# Supplementary material for: Two conserved transcription factors and a histone deubiquitinase regulate the mitochondrial unfolded protein response and longevity interacting with insulin signalling.
Source: Research Square preprint supplement (doi:10.21203/rs.3.rs-3337719/v1), 2023-10-05
Supplement: Supplementary file 1 [file 21e41f7599c29d346f729407.xlsx]

## Sheet: Raw data RNAi screening
phenotype	replica	worms.plate	worms.row	worms.column	worms.Target	worms.absIntensity	worms.background	worms.intensity	worms.length	worms.Internal_GeneID	worms.GeneName	worms.Count	worms.count_large
D2	firstrep	49	7	3	1	131.814	131.704	0.109	377.536	4R79.2	4R79.2	42	26
D2	firstrep	49	7	3	2	268.681	137.642	131.038	1022.69	4R79.2	4R79.2	42	26
D2	firstrep	49	7	3	3	213.826	133.251	80.575	1058.46	4R79.2	4R79.2	42	26
D2	firstrep	49	7	3	4	138.497	136.495	2.002	461.447	4R79.2	4R79.2	42	26
D2	firstrep	49	7	3	5	132.843	132.584	0.259	380.582	4R79.2	4R79.2	42	26
D2	firstrep	49	7	3	6	232.318	138.529	93.788	989.858	4R79.2	4R79.2	42	26
D2	firstrep	49	7	3	7	135.065	133.625	1.44	594.566	4R79.2	4R79.2	42	26
D2	firstrep	49	7	3	8	241.706	140.297	101.409	941.785	4R79.2	4R79.2	42	26
D2	firstrep	49	7	3	9	156.625	136.804	19.821	622.608	4R79.2	4R79.2	42	26
D2	firstrep	49	7	3	10	134.032	133.818	0.214	459.102	4R79.2	4R79.2	42	26
D2	firstrep	49	7	3	11	262.185	146.828	115.357	1025.76	4R79.2	4R79.2	42	26
D2	firstrep	49	7	3	12	234.292	142.933	91.359	985.684	4R79.2	4R79.2	42	26
D2	firstrep	49	7	3	13	133.49	133.515	-0.025	446.711	4R79.2	4R79.2	42	26
D2	firstrep	49	7	3	14	141.528	141.848	-0.32	534.951	4R79.2	4R79.2	42	26
D2	firstrep	49	7	3	15	142.53	142.775	-0.245	374.531	4R79.2	4R79.2	42	26
D2	firstrep	49	7	3	16	267.352	142.787	124.565	998.698	4R79.2	4R79.2	42	26
D2	firstrep	49	7	3	17	143.459	144.201	-0.742	462.976	4R79.2	4R79.2	42	26
D2	firstrep	49	7	3	18	262.088	146.976	115.112	937.999	4R79.2	4R79.2	42	26
D2	firstrep	49	7	3	19	190.847	134.561	56.286	961.386	4R79.2	4R79.2	42	26
D2	firstrep	49	7	3	20	241.471	150.143	91.328	1049.14	4R79.2	4R79.2	42	26
D2	firstrep	49	7	3	21	134.593	134.784	-0.191	350.321	4R79.2	4R79.2	42	26
D2	firstrep	49	7	3	22	266.398	149.767	116.631	931.688	4R79.2	4R79.2	42	26
D2	firstrep	49	7	3	23	147.345	148.227	-0.882	398.96	4R79.2	4R79.2	42	26
D2	firstrep	49	7	3	24	146.753	144.885	1.868	580.633	4R79.2	4R79.2	42	26
D2	firstrep	49	7	3	25	267.098	151.026	116.072	990.731	4R79.2	4R79.2	42	26
D2	firstrep	49	7	3	26	139.266	139.984	-0.718	362.651	4R79.2	4R79.2	42	26
D2	firstrep	49	7	3	27	309.995	152.189	157.806	1018.52	4R79.2	4R79.2	42	26
D2	firstrep	49	7	3	28	294.128	152.919	141.209	1013.7	4R79.2	4R79.2	42	26
D2	firstrep	49	7	3	29	228.411	144.723	83.688	892.69	4R79.2	4R79.2	42	26
D2	firstrep	49	7	3	30	217.385	136.435	80.95	985.011	4R79.2	4R79.2	42	26
D2	firstrep	49	7	3	31	249.273	145.253	104.02	946.492	4R79.2	4R79.2	42	26
D2	firstrep	49	7	3	32	255.421	148.45	106.971	738.132	4R79.2	4R79.2	42	26
D2	firstrep	49	7	3	33	242.886	143.362	99.524	972.389	4R79.2	4R79.2	42	26
D2	firstrep	49	7	3	34	143.27	143.832	-0.562	343.445	4R79.2	4R79.2	42	26
D2	firstrep	49	7	3	35	259.295	147.272	112.023	959.912	4R79.2	4R79.2	42	26
D2	firstrep	49	7	3	36	248.209	142.239	105.97	949.629	4R79.2	4R79.2	42	26
D2	firstrep	49	7	3	37	231.502	140.397	91.105	959.679	4R79.2	4R79.2	42	26
D2	firstrep	49	7	3	38	275.405	144.844	130.561	1011.69	4R79.2	4R79.2	42	26
D2	firstrep	49	7	3	39	140.111	140.436	-0.325	337.845	4R79.2	4R79.2	42	26
D2	firstrep	49	7	3	40	274.872	140.331	134.541	849.279	4R79.2	4R79.2	42	26
D2	firstrep	49	7	3	41	281.673	138.449	143.224	975.491	4R79.2	4R79.2	42	26
D2	firstrep	49	7	3	42	217.447	136.265	81.182	1027.93	4R79.2	4R79.2	42	26
D2	secondrep	49	7	3	1	121.193	119.346	1.847	565.75	4R79.2	4R79.2	30	28
D2	secondrep	49	7	3	2	176.091	120.246	55.845	884.106	4R79.2	4R79.2	30	28
D2	secondrep	49	7	3	3	178.389	122.115	56.273	834.784	4R79.2	4R79.2	30	28
D2	secondrep	49	7	3	4	179.943	123.715	56.228	844.498	4R79.2	4R79.2	30	28
D2	secondrep	49	7	3	5	169.034	123.689	45.345	876.278	4R79.2	4R79.2	30	28
D2	secondrep	49	7	3	6	185.309	123.212	62.097	883.715	4R79.2	4R79.2	30	28
D2	secondrep	49	7	3	7	173.351	123.776	49.575	826.401	4R79.2	4R79.2	30	28
D2	secondrep	49	7	3	8	181.728	129.257	52.47	973.415	4R79.2	4R79.2	30	28
D2	secondrep	49	7	3	9	188.04	121.33	66.71	752.84	4R79.2	4R79.2	30	28
D2	secondrep	49	7	3	10	187.828	122.9	64.928	933.396	4R79.2	4R79.2	30	28
D2	secondrep	49	7	3	11	121.577	121.444	0.133	476.604	4R79.2	4R79.2	30	28
D2	secondrep	49	7	3	12	187.571	122.425	65.146	931.563	4R79.2	4R79.2	30	28
D2	secondrep	49	7	3	13	178.904	123.628	55.276	920.05	4R79.2	4R79.2	30	28
D2	secondrep	49	7	3	14	193.073	125.09	67.984	911.652	4R79.2	4R79.2	30	28
D2	secondrep	49	7	3	15	167.392	125.679	41.713	898.93	4R79.2	4R79.2	30	28
D2	secondrep	49	7	3	16	180.442	122.384	58.058	1038.64	4R79.2	4R79.2	30	28
D2	secondrep	49	7	3	17	180.575	128.239	52.336	830.821	4R79.2	4R79.2	30	28
D2	secondrep	49	7	3	18	225.713	126.931	98.782	919.78	4R79.2	4R79.2	30	28
D2	secondrep	49	7	3	19	231.259	125.506	105.753	955.139	4R79.2	4R79.2	30	28
D2	secondrep	49	7	3	20	177.063	122.637	54.427	899.555	4R79.2	4R79.2	30	28
D2	secondrep	49	7	3	21	172.341	125.432	46.908	798.186	4R79.2	4R79.2	30	28
D2	secondrep	49	7	3	22	181.687	125.985	55.702	926.97	4R79.2	4R79.2	30	28
D2	secondrep	49	7	3	23	216.5	122.722	93.778	908.537	4R79.2	4R79.2	30	28
D2	secondrep	49	7	3	24	202.336	125.372	76.964	924.616	4R79.2	4R79.2	30	28
D2	secondrep	49	7	3	25	201.82	126.302	75.518	801.145	4R79.2	4R79.2	30	28
D2	secondrep	49	7	3	26	195.218	124.044	71.174	899.284	4R79.2	4R79.2	30	28
D2	secondrep	49	7	3	27	181.132	123.18	57.952	932.051	4R79.2	4R79.2	30	28
D2	secondrep	49	7	3	28	178.803	123.958	54.845	870.551	4R79.2	4R79.2	30	28
D2	secondrep	49	7	3	29	190.928	125.668	65.26	923.105	4R79.2	4R79.2	30	28
D2	secondrep	49	7	3	30	186.779	122.474	64.305	853.656	4R79.2	4R79.2	30	28
WT	secondrep	49	7	3	1	201.981	121.07	80.911	970.902	4R79.2	4R79.2	31	31
WT	secondrep	49	7	3	2	260.99	123.472	137.517	908.838	4R79.2	4R79.2	31	31
WT	secondrep	49	7	3	3	242.952	125.242	117.71	939.598	4R79.2	4R79.2	31	31
WT	secondrep	49	7	3	4	218.429	123.85	94.579	888.845	4R79.2	4R79.2	31	31
WT	secondrep	49	7	3	5	249.726	123.686	126.04	910.184	4R79.2	4R79.2	31	31
WT	secondrep	49	7	3	6	143.283	119.811	23.472	889.098	4R79.2	4R79.2	31	31
WT	secondrep	49	7	3	7	269.955	122.883	147.073	929.467	4R79.2	4R79.2	31	31
WT	secondrep	49	7	3	8	272.041	125.224	146.817	949.802	4R79.2	4R79.2	31	31
WT	secondrep	49	7	3	9	257.565	126.468	131.097	973.739	4R79.2	4R79.2	31	31
WT	secondrep	49	7	3	10	248.9	126.761	122.14	972.8	4R79.2	4R79.2	31	31
WT	secondrep	49	7	3	11	200.72	122.328	78.392	967.878	4R79.2	4R79.2	31	31
WT	secondrep	49	7	3	12	270.721	124.816	145.905	950.332	4R79.2	4R79.2	31	31
WT	secondrep	49	7	3	13	201.793	126.364	75.428	830.164	4R79.2	4R79.2	31	31
WT	secondrep	49	7	3	14	257.564	124.001	133.563	876.582	4R79.2	4R79.2	31	31
WT	secondrep	49	7	3	15	242.536	122.748	119.787	999.831	4R79.2	4R79.2	31	31
WT	secondrep	49	7	3	16	169.611	161.944	7.667	940.803	4R79.2	4R79.2	31	31
WT	secondrep	49	7	3	17	243.142	126.977	116.166	933.978	4R79.2	4R79.2	31	31
WT	secondrep	49	7	3	18	402.202	133.614	268.587	915.358	4R79.2	4R79.2	31	31
WT	secondrep	49	7	3	19	185.612	168.556	17.056	956.08	4R79.2	4R79.2	31	31
WT	secondrep	49	7	3	20	240.699	128.79	111.91	1001.21	4R79.2	4R79.2	31	31
WT	secondrep	49	7	3	21	246.243	122.774	123.469	1018.79	4R79.2	4R79.2	31	31
WT	secondrep	49	7	3	22	278.893	129.663	149.23	788.917	4R79.2	4R79.2	31	31
WT	secondrep	49	7	3	23	276.121	124.415	151.706	850.931	4R79.2	4R79.2	31	31
WT	secondrep	49	7	3	24	230.68	135.591	95.089	934.285	4R79.2	4R79.2	31	31
WT	secondrep	49	7	3	25	287.104	129.332	157.772	939.72	4R79.2	4R79.2	31	31
WT	secondrep	49	7	3	26	333.121	129.441	203.68	957.743	4R79.2	4R79.2	31	31
WT	secondrep	49	7	3	27	267.843	128.396	139.447	846.475	4R79.2	4R79.2	31	31
WT	secondrep	49	7	3	28	260.238	124.548	135.69	943.532	4R79.2	4R79.2	31	31
WT	secondrep	49	7	3	29	206.273	123.193	83.08	1110.39	4R79.2	4R79.2	31	31
WT	secondrep	49	7	3	30	224.916	122.53	102.386	660.077	4R79.2	4R79.2	31	31
WT	secondrep	49	7	3	31	256.574	123.646	132.928	846.06	4R79.2	4R79.2	31	31
WT	firstrep	49	7	3	1	282.215	136.008	146.207	989.656	4R79.2	4R79.2	32	32
WT	firstrep	49	7	3	2	258.471	132.435	126.036	859.951	4R79.2	4R79.2	32	32
WT	firstrep	49	7	3	3	266.748	137.244	129.504	921.018	4R79.2	4R79.2	32	32
WT	firstrep	49	7	3	4	298.47	139.343	159.128	972.643	4R79.2	4R79.2	32	32
WT	firstrep	49	7	3	5	251.452	137.611	113.842	975.328	4R79.2	4R79.2	32	32
WT	firstrep	49	7	3	6	259.547	131.997	127.55	981.615	4R79.2	4R79.2	32	32
WT	firstrep	49	7	3	7	331.818	136.959	194.86	916.568	4R79.2	4R79.2	32	32
WT	firstrep	49	7	3	8	351.458	144.248	207.21	972.255	4R79.2	4R79.2	32	32
WT	firstrep	49	7	3	9	267.133	143.836	123.298	1114.79	4R79.2	4R79.2	32	32
WT	firstrep	49	7	3	10	317.584	143.496	174.088	940.796	4R79.2	4R79.2	32	32
WT	firstrep	49	7	3	11	294.374	140.815	153.559	929.73	4R79.2	4R79.2	32	32
WT	firstrep	49	7	3	12	332.267	137.448	194.819	1040.05	4R79.2	4R79.2	32	32
WT	firstrep	49	7	3	13	291.214	144.319	146.895	1034.86	4R79.2	4R79.2	32	32
WT	firstrep	49	7	3	14	297.744	149.82	147.923	940.645	4R79.2	4R79.2	32	32
WT	firstrep	49	7	3	15	318.486	151.308	167.178	1011.42	4R79.2	4R79.2	32	32
WT	firstrep	49	7	3	16	353.411	143.768	209.643	942.38	4R79.2	4R79.2	32	32
WT	firstrep	49	7	3	17	288.787	144.63	144.157	847.353	4R79.2	4R79.2	32	32
WT	firstrep	49	7	3	18	274.709	142.341	132.368	913.761	4R79.2	4R79.2	32	32
WT	firstrep	49	7	3	19	242.547	134.487	108.06	964.835	4R79.2	4R79.2	32	32
WT	firstrep	49	7	3	20	341.158	144.438	196.719	963.937	4R79.2	4R79.2	32	32
WT	firstrep	49	7	3	21	285.638	138.498	147.14	928.761	4R79.2	4R79.2	32	32
WT	firstrep	49	7	3	22	501.081	153.987	347.094	927.488	4R79.2	4R79.2	32	32
WT	firstrep	49	7	3	23	329.512	151.533	177.98	956.385	4R79.2	4R79.2	32	32
WT	firstrep	49	7	3	24	393.619	141.64	251.979	929.513	4R79.2	4R79.2	32	32
WT	firstrep	49	7	3	25	308.106	144.724	163.381	1010.62	4R79.2	4R79.2	32	32
WT	firstrep	49	7	3	26	410.627	150.654	259.972	980.571	4R79.2	4R79.2	32	32
WT	firstrep	49	7	3	27	304.471	148.461	156.011	908.081	4R79.2	4R79.2	32	32
WT	firstrep	49	7	3	28	326.124	150.551	175.573	990.369	4R79.2	4R79.2	32	32
WT	firstrep	49	7	3	29	250.666	139.791	110.875	990.678	4R79.2	4R79.2	32	32
WT	firstrep	49	7	3	30	337.595	146.323	191.272	1000.23	4R79.2	4R79.2	32	32
WT	firstrep	49	7	3	31	336.368	142.107	194.26	943.707	4R79.2	4R79.2	32	32
WT	firstrep	49	7	3	32	253.302	139.606	113.696	926.415	4R79.2	4R79.2	32	32
WT	firstrep	72	8	4	1	183.552	120.346	63.206	1129.66	6R55.1	6R55.1	18	17
WT	firstrep	72	8	4	2	242.14	122.936	119.204	903.767	6R55.1	6R55.1	18	17
WT	firstrep	72	8	4	3	199.362	122.378	76.984	1052.49	6R55.1	6R55.1	18	17
WT	firstrep	72	8	4	4	219.808	122.33	97.478	932.883	6R55.1	6R55.1	18	17
WT	firstrep	72	8	4	5	208.109	127.799	80.31	987.711	6R55.1	6R55.1	18	17
WT	firstrep	72	8	4	6	300.363	134.357	166.006	876.546	6R55.1	6R55.1	18	17
WT	firstrep	72	8	4	7	205.141	128.294	76.847	921.247	6R55.1	6R55.1	18	17
WT	firstrep	72	8	4	8	216.873	126.897	89.976	1024.55	6R55.1	6R55.1	18	17
WT	firstrep	72	8	4	9	224.037	124.927	99.11	958.609	6R55.1	6R55.1	18	17
WT	firstrep	72	8	4	10	244.399	128.547	115.852	1015.33	6R55.1	6R55.1	18	17
WT	firstrep	72	8	4	11	250.099	125.593	124.507	880.457	6R55.1	6R55.1	18	17
WT	firstrep	72	8	4	12	254.473	125.286	129.186	978.739	6R55.1	6R55.1	18	17
WT	firstrep	72	8	4	13	279.497	126.041	153.456	890.255	6R55.1	6R55.1	18	17
WT	firstrep	72	8	4	14	203.023	123.384	79.64	704.948	6R55.1	6R55.1	18	17
WT	firstrep	72	8	4	15	238.37	125.968	112.401	943.346	6R55.1	6R55.1	18	17
WT	firstrep	72	8	4	16	228.58	122.923	105.656	838.189	6R55.1	6R55.1	18	17
WT	firstrep	72	8	4	17	235.376	123.069	112.307	954.559	6R55.1	6R55.1	18	17
WT	firstrep	72	8	4	18	230.918	122.535	108.383	393.941	6R55.1	6R55.1	18	17
D2	secondrep	72	8	4	1	164.917	120.993	43.924	956.878	6R55.1	6R55.1	21	21
D2	secondrep	72	8	4	2	184.83	121.487	63.343	948.753	6R55.1	6R55.1	21	21
D2	secondrep	72	8	4	3	153.586	124.029	29.557	1004.2	6R55.1	6R55.1	21	21
D2	secondrep	72	8	4	4	163.201	124.009	39.192	958.794	6R55.1	6R55.1	21	21
D2	secondrep	72	8	4	5	195.505	126.32	69.185	928.945	6R55.1	6R55.1	21	21
D2	secondrep	72	8	4	6	182.545	132.379	50.166	896.583	6R55.1	6R55.1	21	21
D2	secondrep	72	8	4	7	188.097	123.161	64.935	955.559	6R55.1	6R55.1	21	21
D2	secondrep	72	8	4	8	204.919	128.102	76.817	958.256	6R55.1	6R55.1	21	21
D2	secondrep	72	8	4	9	210.784	126.143	84.642	883.452	6R55.1	6R55.1	21	21
D2	secondrep	72	8	4	10	171.761	124.395	47.367	913.441	6R55.1	6R55.1	21	21
D2	secondrep	72	8	4	11	184.986	122.724	62.262	865.097	6R55.1	6R55.1	21	21
D2	secondrep	72	8	4	12	195.367	124.549	70.818	998.298	6R55.1	6R55.1	21	21
D2	secondrep	72	8	4	13	179.882	128.635	51.247	935.031	6R55.1	6R55.1	21	21
D2	secondrep	72	8	4	14	182.163	126.731	55.431	905.175	6R55.1	6R55.1	21	21
D2	secondrep	72	8	4	15	215.722	128.218	87.504	906.816	6R55.1	6R55.1	21	21
D2	secondrep	72	8	4	16	175.972	132.414	43.558	889.474	6R55.1	6R55.1	21	21
D2	secondrep	72	8	4	17	197.403	126.231	71.172	903.042	6R55.1	6R55.1	21	21
D2	secondrep	72	8	4	18	187.357	134.09	53.267	940.31	6R55.1	6R55.1	21	21
D2	secondrep	72	8	4	19	194.275	123.798	70.477	893.764	6R55.1	6R55.1	21	21
D2	secondrep	72	8	4	20	127.683	127.337	0.346	977.63	6R55.1	6R55.1	21	21
D2	secondrep	72	8	4	21	185.553	142.164	43.389	712.304	6R55.1	6R55.1	21	21
D2	firstrep	72	8	4	1	171.485	120.553	50.931	917.555	6R55.1	6R55.1	28	25
D2	firstrep	72	8	4	2	206.213	120.315	85.899	887.861	6R55.1	6R55.1	28	25
D2	firstrep	72	8	4	3	169.032	120.413	48.619	1024.36	6R55.1	6R55.1	28	25
D2	firstrep	72	8	4	4	157.712	150.715	6.997	1054.92	6R55.1	6R55.1	28	25
D2	firstrep	72	8	4	5	149.845	121.116	28.729	552.783	6R55.1	6R55.1	28	25
D2	firstrep	72	8	4	6	184.276	121.487	62.79	944.78	6R55.1	6R55.1	28	25
D2	firstrep	72	8	4	7	119.322	118.447	0.875	426.506	6R55.1	6R55.1	28	25
D2	firstrep	72	8	4	8	203.393	126.376	77.017	915.218	6R55.1	6R55.1	28	25
D2	firstrep	72	8	4	9	185.105	123.056	62.049	850.083	6R55.1	6R55.1	28	25
D2	firstrep	72	8	4	10	194.805	124.55	70.256	956.766	6R55.1	6R55.1	28	25
D2	firstrep	72	8	4	11	169.783	129.051	40.732	1023.76	6R55.1	6R55.1	28	25
D2	firstrep	72	8	4	12	184.058	124.947	59.111	997.238	6R55.1	6R55.1	28	25
D2	firstrep	72	8	4	13	193.594	126.02	67.574	943.615	6R55.1	6R55.1	28	25
D2	firstrep	72	8	4	14	191.25	127.525	63.726	999.213	6R55.1	6R55.1	28	25
D2	firstrep	72	8	4	15	190.547	122.649	67.898	885.137	6R55.1	6R55.1	28	25
D2	firstrep	72	8	4	16	216.735	129.521	87.214	1049.65	6R55.1	6R55.1	28	25
D2	firstrep	72	8	4	17	200.232	126.973	73.259	979.056	6R55.1	6R55.1	28	25
D2	firstrep	72	8	4	18	178.71	121.382	57.327	894.669	6R55.1	6R55.1	28	25
D2	firstrep	72	8	4	19	203.72	164.27	39.45	1050.26	6R55.1	6R55.1	28	25
D2	firstrep	72	8	4	20	208.001	129.663	78.338	914.687	6R55.1	6R55.1	28	25
D2	firstrep	72	8	4	21	216.556	128.064	88.492	970.859	6R55.1	6R55.1	28	25
D2	firstrep	72	8	4	22	192.833	124.922	67.912	1031.97	6R55.1	6R55.1	28	25
D2	firstrep	72	8	4	23	205.817	126.312	79.504	874.722	6R55.1	6R55.1	28	25
D2	firstrep	72	8	4	24	222.078	129.452	92.626	1037.07	6R55.1	6R55.1	28	25
D2	firstrep	72	8	4	25	159.32	121.38	37.939	517.282	6R55.1	6R55.1	28	25
D2	firstrep	72	8	4	26	196.389	126.31	70.079	874.328	6R55.1	6R55.1	28	25
D2	firstrep	72	8	4	27	201.016	125.654	75.362	992.231	6R55.1	6R55.1	28	25
D2	firstrep	72	8	4	28	193.763	125.752	68.011	969.868	6R55.1	6R55.1	28	25
WT	secondrep	72	8	4	1	200.188	129.502	70.686	395.807	6R55.1	6R55.1	38	36
WT	secondrep	72	8	4	2	242.717	130.879	111.838	347.409	6R55.1	6R55.1	38	36
WT	secondrep	72	8	4	3	397.335	133.967	263.368	784.346	6R55.1	6R55.1	38	36
WT	secondrep	72	8	4	4	323.643	134.937	188.705	893.805	6R55.1	6R55.1	38	36
WT	secondrep	72	8	4	5	280.541	133.873	146.668	961.787	6R55.1	6R55.1	38	36
WT	secondrep	72	8	4	6	350.608	136.658	213.95	864.384	6R55.1	6R55.1	38	36
WT	secondrep	72	8	4	7	364.895	139.875	225.02	904.305	6R55.1	6R55.1	38	36
WT	secondrep	72	8	4	8	300.44	140.238	160.201	931.781	6R55.1	6R55.1	38	36
WT	secondrep	72	8	4	9	287.909	137.557	150.352	875.763	6R55.1	6R55.1	38	36
WT	secondrep	72	8	4	10	320.208	141.059	179.149	936.763	6R55.1	6R55.1	38	36
WT	secondrep	72	8	4	11	330.859	136.014	194.845	916.881	6R55.1	6R55.1	38	36
WT	secondrep	72	8	4	12	287.507	141.561	145.946	965.542	6R55.1	6R55.1	38	36
WT	secondrep	72	8	4	13	274.284	135.101	139.184	926.079	6R55.1	6R55.1	38	36
WT	secondrep	72	8	4	14	345.899	138.569	207.33	913.415	6R55.1	6R55.1	38	36
WT	secondrep	72	8	4	15	277.021	138.894	138.127	877.207	6R55.1	6R55.1	38	36
WT	secondrep	72	8	4	16	365.39	141.755	223.634	879.779	6R55.1	6R55.1	38	36
WT	secondrep	72	8	4	17	356.34	143.178	213.161	919.102	6R55.1	6R55.1	38	36
WT	secondrep	72	8	4	18	327.564	139.994	187.57	888.342	6R55.1	6R55.1	38	36
WT	secondrep	72	8	4	19	341.091	135.647	205.444	939.998	6R55.1	6R55.1	38	36
WT	secondrep	72	8	4	20	401.703	147.261	254.441	943.232	6R55.1	6R55.1	38	36
WT	secondrep	72	8	4	21	344.672	136.921	207.751	833.038	6R55.1	6R55.1	38	36
WT	secondrep	72	8	4	22	362.842	140.786	222.056	880.363	6R55.1	6R55.1	38	36
WT	secondrep	72	8	4	23	292.45	141.19	151.261	859.369	6R55.1	6R55.1	38	36
WT	secondrep	72	8	4	24	344.658	145.591	199.067	941.761	6R55.1	6R55.1	38	36
WT	secondrep	72	8	4	25	464.098	147.134	316.964	870.186	6R55.1	6R55.1	38	36
WT	secondrep	72	8	4	26	352.48	142.275	210.205	920.743	6R55.1	6R55.1	38	36
WT	secondrep	72	8	4	27	300.378	141.337	159.041	955.603	6R55.1	6R55.1	38	36
WT	secondrep	72	8	4	28	354.261	144.962	209.299	938.368	6R55.1	6R55.1	38	36
WT	secondrep	72	8	4	29	344.065	145.493	198.572	885.394	6R55.1	6R55.1	38	36
WT	secondrep	72	8	4	30	298.966	141.294	157.672	965.191	6R55.1	6R55.1	38	36
WT	secondrep	72	8	4	31	267.021	137.269	129.752	1375.79	6R55.1	6R55.1	38	36
WT	secondrep	72	8	4	32	315.097	135.935	179.162	940.487	6R55.1	6R55.1	38	36
WT	secondrep	72	8	4	33	342.433	140.557	201.877	904.455	6R55.1	6R55.1	38	36
WT	secondrep	72	8	4	34	328.464	138.701	189.763	925.586	6R55.1	6R55.1	38	36
WT	secondrep	72	8	4	35	348.819	139.21	209.608	846.413	6R55.1	6R55.1	38	36
WT	secondrep	72	8	4	36	299.236	140.101	159.135	951.684	6R55.1	6R55.1	38	36
WT	secondrep	72	8	4	37	365.622	135.802	229.82	828.016	6R55.1	6R55.1	38	36
WT	secondrep	72	8	4	38	294.755	134.813	159.941	882.028	6R55.1	6R55.1	38	36
D2	secondrep	17	3	8	1	224.721	138.309	86.412	771.851	R05F9.12	aagr-2	11	11
D2	secondrep	17	3	8	2	245.299	139.418	105.882	955.782	R05F9.12	aagr-2	11	11
D2	secondrep	17	3	8	3	172.604	131.353	41.251	806.188	R05F9.12	aagr-2	11	11
D2	secondrep	17	3	8	4	276.371	140.717	135.655	1009.24	R05F9.12	aagr-2	11	11
D2	secondrep	17	3	8	5	181.672	143.122	38.55	750.506	R05F9.12	aagr-2	11	11
D2	secondrep	17	3	8	6	271.675	154.942	116.733	878.085	R05F9.12	aagr-2	11	11
D2	secondrep	17	3	8	7	327.23	141.427	185.803	922.311	R05F9.12	aagr-2	11	11
D2	secondrep	17	3	8	8	280.114	140.707	139.407	877.871	R05F9.12	aagr-2	11	11
D2	secondrep	17	3	8	9	227.468	140.661	86.808	1031.11	R05F9.12	aagr-2	11	11
D2	secondrep	17	3	8	10	278.084	144.852	133.232	800.794	R05F9.12	aagr-2	11	11
D2	secondrep	17	3	8	11	327.113	150.109	177.004	898.326	R05F9.12	aagr-2	11	11
D2	firstrep	17	3	8	1	230.508	134.628	95.88	950.181	R05F9.12	aagr-2	34	32
D2	firstrep	17	3	8	2	275.253	133.623	141.63	918.346	R05F9.12	aagr-2	34	32
D2	firstrep	17	3	8	3	300.004	134.513	165.491	922.393	R05F9.12	aagr-2	34	32
D2	firstrep	17	3	8	4	128.85	128.458	0.392	446.89	R05F9.12	aagr-2	34	32
D2	firstrep	17	3	8	5	225.671	132.825	92.846	800.523	R05F9.12	aagr-2	34	32
D2	firstrep	17	3	8	6	253.949	135.729	118.22	799.746	R05F9.12	aagr-2	34	32
D2	firstrep	17	3	8	7	182.097	133.422	48.675	855.666	R05F9.12	aagr-2	34	32
D2	firstrep	17	3	8	8	269.345	135.474	133.872	1057.47	R05F9.12	aagr-2	34	32
D2	firstrep	17	3	8	9	334.674	143.252	191.422	842.549	R05F9.12	aagr-2	34	32
D2	firstrep	17	3	8	10	209.822	132.158	77.664	949.236	R05F9.12	aagr-2	34	32
D2	firstrep	17	3	8	11	136.949	136.787	0.162	419.129	R05F9.12	aagr-2	34	32
D2	firstrep	17	3	8	12	304.465	146.961	157.504	903.62	R05F9.12	aagr-2	34	32
D2	firstrep	17	3	8	13	275.797	140.392	135.405	1008.77	R05F9.12	aagr-2	34	32
D2	firstrep	17	3	8	14	252.381	144.242	108.139	862.164	R05F9.12	aagr-2	34	32
D2	firstrep	17	3	8	15	234.01	139.558	94.452	858.07	R05F9.12	aagr-2	34	32
D2	firstrep	17	3	8	16	286.564	150.047	136.517	1222.16	R05F9.12	aagr-2	34	32
D2	firstrep	17	3	8	17	223.695	137.9	85.794	786.928	R05F9.12	aagr-2	34	32
D2	firstrep	17	3	8	18	258.626	149.537	109.089	896.579	R05F9.12	aagr-2	34	32
D2	firstrep	17	3	8	19	249.641	143.837	105.804	723.211	R05F9.12	aagr-2	34	32
D2	firstrep	17	3	8	20	303.67	149.731	153.939	812.761	R05F9.12	aagr-2	34	32
D2	firstrep	17	3	8	21	218.603	139.954	78.649	892.427	R05F9.12	aagr-2	34	32
D2	firstrep	17	3	8	22	200.718	138.635	62.083	982.057	R05F9.12	aagr-2	34	32
D2	firstrep	17	3	8	23	254.621	144.425	110.195	843.373	R05F9.12	aagr-2	34	32
D2	firstrep	17	3	8	24	226.579	132.898	93.681	916.358	R05F9.12	aagr-2	34	32
D2	firstrep	17	3	8	25	265.896	134.797	131.099	912.246	R05F9.12	aagr-2	34	32
D2	firstrep	17	3	8	26	264.907	143.459	121.448	802.694	R05F9.12	aagr-2	34	32
D2	firstrep	17	3	8	27	285.994	139.481	146.513	888.849	R05F9.12	aagr-2	34	32
D2	firstrep	17	3	8	28	274.67	141.497	133.173	826.29	R05F9.12	aagr-2	34	32
D2	firstrep	17	3	8	29	237.672	132.137	105.535	803.505	R05F9.12	aagr-2	34	32
D2	firstrep	17	3	8	30	289.481	139.974	149.507	990.066	R05F9.12	aagr-2	34	32
D2	firstrep	17	3	8	31	333.668	141.448	192.22	965.399	R05F9.12	aagr-2	34	32
D2	firstrep	17	3	8	32	264.375	136.728	127.647	818.404	R05F9.12	aagr-2	34	32
D2	firstrep	17	3	8	33	263.626	135.546	128.08	804.905	R05F9.12	aagr-2	34	32
D2	firstrep	17	3	8	34	238.213	137.843	100.37	802.555	R05F9.12	aagr-2	34	32
WT	firstrep	17	3	8	1	226.646	121.596	105.05	942.524	R05F9.12	aagr-2	34	34
WT	firstrep	17	3	8	2	254.061	123.136	130.926	860.768	R05F9.12	aagr-2	34	34
WT	firstrep	17	3	8	3	244.673	124.098	120.574	1029.63	R05F9.12	aagr-2	34	34
WT	firstrep	17	3	8	4	225.773	122.676	103.097	929.766	R05F9.12	aagr-2	34	34
WT	firstrep	17	3	8	5	269.292	126.953	142.34	903.151	R05F9.12	aagr-2	34	34
WT	firstrep	17	3	8	6	241.597	122.584	119.013	865.845	R05F9.12	aagr-2	34	34
WT	firstrep	17	3	8	7	271.567	127.099	144.468	910.682	R05F9.12	aagr-2	34	34
WT	firstrep	17	3	8	8	245.149	127.748	117.401	858.672	R05F9.12	aagr-2	34	34
WT	firstrep	17	3	8	9	284.622	129.798	154.824	958.215	R05F9.12	aagr-2	34	34
WT	firstrep	17	3	8	10	239.486	125.445	114.041	942.58	R05F9.12	aagr-2	34	34
WT	firstrep	17	3	8	11	314.248	130.776	183.472	847.305	R05F9.12	aagr-2	34	34
WT	firstrep	17	3	8	12	258.943	129.089	129.854	738.76	R05F9.12	aagr-2	34	34
WT	firstrep	17	3	8	13	278.789	123.8	154.989	939.23	R05F9.12	aagr-2	34	34
WT	firstrep	17	3	8	14	217.477	127.951	89.526	671.704	R05F9.12	aagr-2	34	34
WT	firstrep	17	3	8	15	276.685	127.935	148.75	860.985	R05F9.12	aagr-2	34	34
WT	firstrep	17	3	8	16	284.128	131.6	152.528	932.393	R05F9.12	aagr-2	34	34
WT	firstrep	17	3	8	17	350.837	133.287	217.55	890.461	R05F9.12	aagr-2	34	34
WT	firstrep	17	3	8	18	281.454	125.099	156.355	967.455	R05F9.12	aagr-2	34	34
WT	firstrep	17	3	8	19	272.08	131.015	141.066	897.626	R05F9.12	aagr-2	34	34
WT	firstrep	17	3	8	20	272.99	128.965	144.025	938.079	R05F9.12	aagr-2	34	34
WT	firstrep	17	3	8	21	274.937	125.142	149.795	861.584	R05F9.12	aagr-2	34	34
WT	firstrep	17	3	8	22	228.356	124.833	103.523	947.573	R05F9.12	aagr-2	34	34
WT	firstrep	17	3	8	23	258.259	131.549	126.71	940.995	R05F9.12	aagr-2	34	34
WT	firstrep	17	3	8	24	275.722	127.98	147.742	893.359	R05F9.12	aagr-2	34	34
WT	firstrep	17	3	8	25	303.037	131.01	172.027	807.659	R05F9.12	aagr-2	34	34
WT	firstrep	17	3	8	26	280.933	127.559	153.374	922.217	R05F9.12	aagr-2	34	34
WT	firstrep	17	3	8	27	290.565	130.79	159.775	864.311	R05F9.12	aagr-2	34	34
WT	firstrep	17	3	8	28	278.162	128.314	149.848	882.217	R05F9.12	aagr-2	34	34
WT	firstrep	17	3	8	29	307.709	131.688	176.021	940.338	R05F9.12	aagr-2	34	34
WT	firstrep	17	3	8	30	258.505	133.171	125.334	848.79	R05F9.12	aagr-2	34	34
WT	firstrep	17	3	8	31	330.576	130.313	200.263	927.977	R05F9.12	aagr-2	34	34
WT	firstrep	17	3	8	32	296.883	127.591	169.291	919.423	R05F9.12	aagr-2	34	34
WT	firstrep	17	3	8	33	281.676	125.324	156.352	880.301	R05F9.12	aagr-2	34	34
WT	firstrep	17	3	8	34	249.473	126.18	123.293	929.771	R05F9.12	aagr-2	34	34
WT	secondrep	17	3	8	1	342.526	140.385	202.141	979.472	R05F9.12	aagr-2	35	34
WT	secondrep	17	3	8	2	318.266	141.667	176.599	933.134	R05F9.12	aagr-2	35	34
WT	secondrep	17	3	8	3	360.228	142.82	217.408	1027.41	R05F9.12	aagr-2	35	34
WT	secondrep	17	3	8	4	414.55	150.213	264.338	732.158	R05F9.12	aagr-2	35	34
WT	secondrep	17	3	8	5	327.801	140.862	186.939	1011.79	R05F9.12	aagr-2	35	34
WT	secondrep	17	3	8	6	475.785	151.631	324.154	883.448	R05F9.12	aagr-2	35	34
WT	secondrep	17	3	8	7	510.797	146.848	363.949	909.509	R05F9.12	aagr-2	35	34
WT	secondrep	17	3	8	8	357.861	141.556	216.305	1002.37	R05F9.12	aagr-2	35	34
WT	secondrep	17	3	8	9	336.324	145.006	191.318	995.048	R05F9.12	aagr-2	35	34
WT	secondrep	17	3	8	10	338.806	142.133	196.673	998.742	R05F9.12	aagr-2	35	34
WT	secondrep	17	3	8	11	438.593	138.505	300.088	839.119	R05F9.12	aagr-2	35	34
WT	secondrep	17	3	8	12	353.407	143.077	210.33	983.684	R05F9.12	aagr-2	35	34
WT	secondrep	17	3	8	13	235.759	257.328	-21.569	952.835	R05F9.12	aagr-2	35	34
WT	secondrep	17	3	8	14	347.694	145.583	202.11	949.798	R05F9.12	aagr-2	35	34
WT	secondrep	17	3	8	15	389.347	141.692	247.655	935.916	R05F9.12	aagr-2	35	34
WT	secondrep	17	3	8	16	407.698	146.681	261.017	886.291	R05F9.12	aagr-2	35	34
WT	secondrep	17	3	8	17	532.52	185.263	347.256	952.49	R05F9.12	aagr-2	35	34
WT	secondrep	17	3	8	18	146.34	146.085	0.255	524.607	R05F9.12	aagr-2	35	34
WT	secondrep	17	3	8	19	281.3	136.785	144.515	884.055	R05F9.12	aagr-2	35	34
WT	secondrep	17	3	8	20	545.444	155.171	390.273	881.167	R05F9.12	aagr-2	35	34
WT	secondrep	17	3	8	21	442.921	147.944	294.976	935.975	R05F9.12	aagr-2	35	34
WT	secondrep	17	3	8	22	411.855	148.561	263.294	902.509	R05F9.12	aagr-2	35	34
WT	secondrep	17	3	8	23	486.741	152.75	333.992	754.499	R05F9.12	aagr-2	35	34
WT	secondrep	17	3	8	24	457.162	141.825	315.338	933.351	R05F9.12	aagr-2	35	34
WT	secondrep	17	3	8	25	377.675	142.924	234.752	953.546	R05F9.12	aagr-2	35	34
WT	secondrep	17	3	8	26	394.658	144.306	250.352	976.599	R05F9.12	aagr-2	35	34
WT	secondrep	17	3	8	27	454.284	148.43	305.854	878.338	R05F9.12	aagr-2	35	34
WT	secondrep	17	3	8	28	330.099	148.396	181.702	878.704	R05F9.12	aagr-2	35	34
WT	secondrep	17	3	8	29	445.493	146.24	299.253	953.735	R05F9.12	aagr-2	35	34
WT	secondrep	17	3	8	30	420.46	144.71	275.75	967.802	R05F9.12	aagr-2	35	34
WT	secondrep	17	3	8	31	451.031	144.553	306.478	916.243	R05F9.12	aagr-2	35	34
WT	secondrep	17	3	8	32	497.245	143.603	353.642	915.23	R05F9.12	aagr-2	35	34
WT	secondrep	17	3	8	33	353.961	138.644	215.316	910.861	R05F9.12	aagr-2	35	34
WT	secondrep	17	3	8	34	390.124	140.937	249.187	926.888	R05F9.12	aagr-2	35	34
WT	secondrep	17	3	8	35	426.806	137.678	289.128	864.001	R05F9.12	aagr-2	35	34
WT	secondrep	63	1	11	1	441.409	136.457	304.951	656.155	F52D1.1	aagr-4	5	2
WT	secondrep	63	1	11	2	330.276	144.945	185.331	466.32	F52D1.1	aagr-4	5	2
WT	secondrep	63	1	11	3	305.148	127.337	177.811	847.989	F52D1.1	aagr-4	5	2
WT	secondrep	63	1	11	4	409.484	128.236	281.248	765.818	F52D1.1	aagr-4	5	2
WT	secondrep	63	1	11	5	125.721	121.314	4.406	457.839	F52D1.1	aagr-4	5	2
WT	firstrep	63	1	11	1	295.857	134.374	161.482	917.108	F52D1.1	aagr-4	24	21
WT	firstrep	63	1	11	2	238.791	134.667	104.123	1013.83	F52D1.1	aagr-4	24	21
WT	firstrep	63	1	11	3	295.433	134.176	161.258	770.404	F52D1.1	aagr-4	24	21
WT	firstrep	63	1	11	4	293.354	134.369	158.984	924.51	F52D1.1	aagr-4	24	21
WT	firstrep	63	1	11	5	308.723	142.293	166.43	888.914	F52D1.1	aagr-4	24	21
WT	firstrep	63	1	11	6	249.075	135.74	113.335	880.567	F52D1.1	aagr-4	24	21
WT	firstrep	63	1	11	7	349.64	141.418	208.222	963.201	F52D1.1	aagr-4	24	21
WT	firstrep	63	1	11	8	285.585	141.284	144.301	832.752	F52D1.1	aagr-4	24	21
WT	firstrep	63	1	11	9	290.159	184.61	105.549	908.089	F52D1.1	aagr-4	24	21
WT	firstrep	63	1	11	10	310.306	136.502	173.804	940.336	F52D1.1	aagr-4	24	21
WT	firstrep	63	1	11	11	350.42	146.316	204.104	1029.1	F52D1.1	aagr-4	24	21
WT	firstrep	63	1	11	12	302.914	142.755	160.159	850.578	F52D1.1	aagr-4	24	21
WT	firstrep	63	1	11	13	139.624	139.784	-0.16	581.902	F52D1.1	aagr-4	24	21
WT	firstrep	63	1	11	14	263.543	137.744	125.799	555.411	F52D1.1	aagr-4	24	21
WT	firstrep	63	1	11	15	276.945	133.674	143.271	897.691	F52D1.1	aagr-4	24	21
WT	firstrep	63	1	11	16	324.992	148.148	176.844	832.654	F52D1.1	aagr-4	24	21
WT	firstrep	63	1	11	17	321.342	148.179	173.163	1002.47	F52D1.1	aagr-4	24	21
WT	firstrep	63	1	11	18	357.188	145.93	211.258	1013.27	F52D1.1	aagr-4	24	21
WT	firstrep	63	1	11	19	133.728	133.909	-0.181	425.014	F52D1.1	aagr-4	24	21
WT	firstrep	63	1	11	20	278.586	135.103	143.483	968.584	F52D1.1	aagr-4	24	21
WT	firstrep	63	1	11	21	348.099	144.096	204.002	867.106	F52D1.1	aagr-4	24	21
WT	firstrep	63	1	11	22	277.545	143.062	134.484	864.46	F52D1.1	aagr-4	24	21
WT	firstrep	63	1	11	23	316.103	137.687	178.416	806.109	F52D1.1	aagr-4	24	21
WT	firstrep	63	1	11	24	295.162	137.203	157.96	830.483	F52D1.1	aagr-4	24	21
D2	secondrep	63	1	11	1	168.051	119.194	48.856	946.05	F52D1.1	aagr-4	25	24
D2	secondrep	63	1	11	2	172.248	121.054	51.194	918.735	F52D1.1	aagr-4	25	24
D2	secondrep	63	1	11	3	153.644	122.161	31.483	849.219	F52D1.1	aagr-4	25	24
D2	secondrep	63	1	11	4	182.908	127.892	55.016	1000.09	F52D1.1	aagr-4	25	24
D2	secondrep	63	1	11	5	185.793	125.204	60.589	958.297	F52D1.1	aagr-4	25	24
D2	secondrep	63	1	11	6	185.504	123.85	61.653	1021.79	F52D1.1	aagr-4	25	24
D2	secondrep	63	1	11	7	148.79	125.965	22.825	759.8	F52D1.1	aagr-4	25	24
D2	secondrep	63	1	11	8	173.242	120.675	52.567	854.287	F52D1.1	aagr-4	25	24
D2	secondrep	63	1	11	9	181.133	123.316	57.816	965.062	F52D1.1	aagr-4	25	24
D2	secondrep	63	1	11	10	197.367	124.725	72.641	874.384	F52D1.1	aagr-4	25	24
D2	secondrep	63	1	11	11	186.22	126.097	60.123	875.241	F52D1.1	aagr-4	25	24
D2	secondrep	63	1	11	12	217.752	126.269	91.483	931.559	F52D1.1	aagr-4	25	24
D2	secondrep	63	1	11	13	210.283	123.948	86.334	937.289	F52D1.1	aagr-4	25	24
D2	secondrep	63	1	11	14	146.596	127.043	19.553	914.504	F52D1.1	aagr-4	25	24
D2	secondrep	63	1	11	15	187.519	129.038	58.481	920.978	F52D1.1	aagr-4	25	24
D2	secondrep	63	1	11	16	170.413	120.512	49.901	710.303	F52D1.1	aagr-4	25	24
D2	secondrep	63	1	11	17	126.732	123.984	2.747	549.879	F52D1.1	aagr-4	25	24
D2	secondrep	63	1	11	18	193.789	123.846	69.943	885.532	F52D1.1	aagr-4	25	24
D2	secondrep	63	1	11	19	170.419	125.741	44.678	885.611	F52D1.1	aagr-4	25	24
D2	secondrep	63	1	11	20	195.748	124.566	71.182	937.763	F52D1.1	aagr-4	25	24
D2	secondrep	63	1	11	21	175.005	125.184	49.821	823.23	F52D1.1	aagr-4	25	24
D2	secondrep	63	1	11	22	194.685	125.249	69.436	831.927	F52D1.1	aagr-4	25	24
D2	secondrep	63	1	11	23	173.116	121.865	51.251	809.695	F52D1.1	aagr-4	25	24
D2	secondrep	63	1	11	24	175.843	122.555	53.287	1009.18	F52D1.1	aagr-4	25	24
D2	secondrep	63	1	11	25	197.227	123.565	73.662	928.858	F52D1.1	aagr-4	25	24
D2	firstrep	63	1	11	1	150.661	131.318	19.342	729.966	F52D1.1	aagr-4	27	26
D2	firstrep	63	1	11	2	178.827	132.347	46.48	783.103	F52D1.1	aagr-4	27	26
D2	firstrep	63	1	11	3	164.469	138.713	25.756	827.162	F52D1.1	aagr-4	27	26
D2	firstrep	63	1	11	4	178.346	130.57	47.775	791.112	F52D1.1	aagr-4	27	26
D2	firstrep	63	1	11	5	207.104	143.117	63.987	719.928	F52D1.1	aagr-4	27	26
D2	firstrep	63	1	11	6	150.886	145.366	5.52	704.105	F52D1.1	aagr-4	27	26
D2	firstrep	63	1	11	7	210.638	141.193	69.445	720.675	F52D1.1	aagr-4	27	26
D2	firstrep	63	1	11	8	210.752	142.687	68.065	782.593	F52D1.1	aagr-4	27	26
D2	firstrep	63	1	11	9	184.688	133.375	51.313	812.979	F52D1.1	aagr-4	27	26
D2	firstrep	63	1	11	10	195.829	143.355	52.474	765.756	F52D1.1	aagr-4	27	26
D2	firstrep	63	1	11	11	150.602	130.843	19.759	761.197	F52D1.1	aagr-4	27	26
D2	firstrep	63	1	11	12	168.747	137.354	31.393	764.31	F52D1.1	aagr-4	27	26
D2	firstrep	63	1	11	13	179.74	151.116	28.624	819.41	F52D1.1	aagr-4	27	26
D2	firstrep	63	1	11	14	180.218	142.239	37.98	771.776	F52D1.1	aagr-4	27	26
D2	firstrep	63	1	11	15	165.916	136.108	29.808	870.612	F52D1.1	aagr-4	27	26
D2	firstrep	63	1	11	16	165.925	140.323	25.602	779.777	F52D1.1	aagr-4	27	26
D2	firstrep	63	1	11	17	171.621	137.001	34.619	787.612	F52D1.1	aagr-4	27	26
D2	firstrep	63	1	11	18	202.595	143.798	58.796	685.474	F52D1.1	aagr-4	27	26
D2	firstrep	63	1	11	19	180.243	140.242	40.001	795.444	F52D1.1	aagr-4	27	26
D2	firstrep	63	1	11	20	190.865	143.931	46.934	1249.49	F52D1.1	aagr-4	27	26
D2	firstrep	63	1	11	21	182.993	142.259	40.734	720.724	F52D1.1	aagr-4	27	26
D2	firstrep	63	1	11	22	182.614	134.298	48.316	1449.89	F52D1.1	aagr-4	27	26
D2	firstrep	63	1	11	23	154.873	141.365	13.508	789.814	F52D1.1	aagr-4	27	26
D2	firstrep	63	1	11	24	152.895	134.881	18.014	847.753	F52D1.1	aagr-4	27	26
D2	firstrep	63	1	11	25	201.586	137.912	63.674	787.078	F52D1.1	aagr-4	27	26
D2	firstrep	63	1	11	26	172.718	135.446	37.271	739.788	F52D1.1	aagr-4	27	26
D2	firstrep	63	1	11	27	133.892	134.516	-0.623	621.395	F52D1.1	aagr-4	27	26
WT	firstrep	34	4	5	1	385.363	143.898	241.465	1012.93	PAR2.3	aak-1	27	27
WT	firstrep	34	4	5	2	345.415	143.715	201.7	691.925	PAR2.3	aak-1	27	27
WT	firstrep	34	4	5	3	279.104	149.579	129.525	881.327	PAR2.3	aak-1	27	27
WT	firstrep	34	4	5	4	437.384	145.368	292.016	898.287	PAR2.3	aak-1	27	27
WT	firstrep	34	4	5	5	412.009	150.009	262	842.669	PAR2.3	aak-1	27	27
WT	firstrep	34	4	5	6	278.495	145.349	133.146	840.382	PAR2.3	aak-1	27	27
WT	firstrep	34	4	5	7	288.057	141.55	146.507	816.904	PAR2.3	aak-1	27	27
WT	firstrep	34	4	5	8	406.697	152.886	253.811	914.585	PAR2.3	aak-1	27	27
WT	firstrep	34	4	5	9	567.571	159.356	408.214	931.788	PAR2.3	aak-1	27	27
WT	firstrep	34	4	5	10	335.411	157.186	178.225	1144.12	PAR2.3	aak-1	27	27
WT	firstrep	34	4	5	11	333.006	141.825	191.182	897.458	PAR2.3	aak-1	27	27
WT	firstrep	34	4	5	12	367.419	146.237	221.182	901.646	PAR2.3	aak-1	27	27
WT	firstrep	34	4	5	13	336.867	141.16	195.707	770.653	PAR2.3	aak-1	27	27
WT	firstrep	34	4	5	14	450.736	139.863	310.873	741.266	PAR2.3	aak-1	27	27
WT	firstrep	34	4	5	15	340.915	147.321	193.594	1029.91	PAR2.3	aak-1	27	27
WT	firstrep	34	4	5	16	366.722	148.642	218.081	808.046	PAR2.3	aak-1	27	27
WT	firstrep	34	4	5	17	511.455	156.774	354.68	819.023	PAR2.3	aak-1	27	27
WT	firstrep	34	4	5	18	368.193	142.113	226.08	878.922	PAR2.3	aak-1	27	27
WT	firstrep	34	4	5	19	284.198	145.79	138.408	817.838	PAR2.3	aak-1	27	27
WT	firstrep	34	4	5	20	292.101	139.84	152.261	819.411	PAR2.3	aak-1	27	27
WT	firstrep	34	4	5	21	347.68	147.802	199.878	864.194	PAR2.3	aak-1	27	27
WT	firstrep	34	4	5	22	307.89	144.536	163.354	790.599	PAR2.3	aak-1	27	27
WT	firstrep	34	4	5	23	360.871	141.979	218.892	685.905	PAR2.3	aak-1	27	27
WT	firstrep	34	4	5	24	275.358	142.482	132.876	1410.3	PAR2.3	aak-1	27	27
WT	firstrep	34	4	5	25	406.661	147.113	259.548	834.513	PAR2.3	aak-1	27	27
WT	firstrep	34	4	5	26	360.072	144.203	215.869	788.984	PAR2.3	aak-1	27	27
WT	firstrep	34	4	5	27	346.191	140.919	205.273	848.945	PAR2.3	aak-1	27	27
D2	secondrep	34	4	5	1	209.624	137.214	72.41	841.031	PAR2.3	aak-1	32	30
D2	secondrep	34	4	5	2	212.442	131.872	80.57	918.116	PAR2.3	aak-1	32	30
D2	secondrep	34	4	5	3	275.412	139.36	136.052	938.739	PAR2.3	aak-1	32	30
D2	secondrep	34	4	5	4	167.363	140.176	27.188	826.095	PAR2.3	aak-1	32	30
D2	secondrep	34	4	5	5	205.078	137.243	67.835	832.379	PAR2.3	aak-1	32	30
D2	secondrep	34	4	5	6	236.235	135.292	100.943	1020.88	PAR2.3	aak-1	32	30
D2	secondrep	34	4	5	7	223.097	139.939	83.158	956.921	PAR2.3	aak-1	32	30
D2	secondrep	34	4	5	8	132.113	132.141	-0.028	393.475	PAR2.3	aak-1	32	30
D2	secondrep	34	4	5	9	227.985	144.211	83.774	852.858	PAR2.3	aak-1	32	30
D2	secondrep	34	4	5	10	276.454	137.505	138.949	935.886	PAR2.3	aak-1	32	30
D2	secondrep	34	4	5	11	321.036	143.107	177.929	930.127	PAR2.3	aak-1	32	30
D2	secondrep	34	4	5	12	194.531	139.077	55.454	766.071	PAR2.3	aak-1	32	30
D2	secondrep	34	4	5	13	283.255	139.627	143.628	894.697	PAR2.3	aak-1	32	30
D2	secondrep	34	4	5	14	231.369	144.509	86.86	931.868	PAR2.3	aak-1	32	30
D2	secondrep	34	4	5	15	240.678	133.778	106.9	813.165	PAR2.3	aak-1	32	30
D2	secondrep	34	4	5	16	263.126	144.188	118.938	933.549	PAR2.3	aak-1	32	30
D2	secondrep	34	4	5	17	129.737	129.84	-0.103	384.219	PAR2.3	aak-1	32	30
D2	secondrep	34	4	5	18	254.729	138.007	116.722	993.093	PAR2.3	aak-1	32	30
D2	secondrep	34	4	5	19	198.252	142.124	56.128	746.104	PAR2.3	aak-1	32	30
D2	secondrep	34	4	5	20	235.521	140.576	94.944	791.19	PAR2.3	aak-1	32	30
D2	secondrep	34	4	5	21	253.556	145.927	107.629	958.632	PAR2.3	aak-1	32	30
D2	secondrep	34	4	5	22	249.838	143.579	106.259	852.645	PAR2.3	aak-1	32	30
D2	secondrep	34	4	5	23	281.998	143.065	138.933	921.27	PAR2.3	aak-1	32	30
D2	secondrep	34	4	5	24	240.842	135.724	105.119	907.088	PAR2.3	aak-1	32	30
D2	secondrep	34	4	5	25	281.552	143.537	138.015	1019.79	PAR2.3	aak-1	32	30
D2	secondrep	34	4	5	26	273.183	140.943	132.24	967.249	PAR2.3	aak-1	32	30
D2	secondrep	34	4	5	27	245.468	136.837	108.631	806.408	PAR2.3	aak-1	32	30
D2	secondrep	34	4	5	28	253.409	135.708	117.702	852.745	PAR2.3	aak-1	32	30
D2	secondrep	34	4	5	29	243.113	136.453	106.66	854.324	PAR2.3	aak-1	32	30
D2	secondrep	34	4	5	30	230.616	138.62	91.996	893.255	PAR2.3	aak-1	32	30
D2	secondrep	34	4	5	31	224.084	137.126	86.958	826.106	PAR2.3	aak-1	32	30
D2	secondrep	34	4	5	32	236.092	135.643	100.448	866.112	PAR2.3	aak-1	32	30
WT	secondrep	34	4	5	1	252.432	134.82	117.611	1160.7	PAR2.3	aak-1	37	35
WT	secondrep	34	4	5	2	307.084	135.596	171.489	1046.48	PAR2.3	aak-1	37	35
WT	secondrep	34	4	5	3	243.922	173.957	69.965	946.472	PAR2.3	aak-1	37	35
WT	secondrep	34	4	5	4	245.148	133.371	111.777	965.189	PAR2.3	aak-1	37	35
WT	secondrep	34	4	5	5	285.451	138.732	146.719	1026.42	PAR2.3	aak-1	37	35
WT	secondrep	34	4	5	6	287.833	140.709	147.124	1022.88	PAR2.3	aak-1	37	35
WT	secondrep	34	4	5	7	264.982	139.814	125.168	1066.95	PAR2.3	aak-1	37	35
WT	secondrep	34	4	5	8	301.372	135.131	166.241	930.918	PAR2.3	aak-1	37	35
WT	secondrep	34	4	5	9	133.474	133.273	0.201	471.804	PAR2.3	aak-1	37	35
WT	secondrep	34	4	5	10	305.334	137.241	168.093	1056.17	PAR2.3	aak-1	37	35
WT	secondrep	34	4	5	11	146.61	142.685	3.925	645.131	PAR2.3	aak-1	37	35
WT	secondrep	34	4	5	12	335.218	138.083	197.134	873.816	PAR2.3	aak-1	37	35
WT	secondrep	34	4	5	13	520.333	150.873	369.459	937.513	PAR2.3	aak-1	37	35
WT	secondrep	34	4	5	14	269.245	140.654	128.59	986.754	PAR2.3	aak-1	37	35
WT	secondrep	34	4	5	15	357.825	136.384	221.44	833.091	PAR2.3	aak-1	37	35
WT	secondrep	34	4	5	16	312.846	142.781	170.065	1221.62	PAR2.3	aak-1	37	35
WT	secondrep	34	4	5	17	400.781	140.394	260.386	1073.37	PAR2.3	aak-1	37	35
WT	secondrep	34	4	5	18	410.347	152.096	258.251	1039.77	PAR2.3	aak-1	37	35
WT	secondrep	34	4	5	19	267.302	147.47	119.832	1061.15	PAR2.3	aak-1	37	35
WT	secondrep	34	4	5	20	353.385	144.649	208.736	965.855	PAR2.3	aak-1	37	35
WT	secondrep	34	4	5	21	456.283	144.992	311.292	976.348	PAR2.3	aak-1	37	35
WT	secondrep	34	4	5	22	426.957	150.415	276.541	994.931	PAR2.3	aak-1	37	35
WT	secondrep	34	4	5	23	435.819	143.622	292.197	1010.4	PAR2.3	aak-1	37	35
WT	secondrep	34	4	5	24	384.694	157.079	227.614	1063.7	PAR2.3	aak-1	37	35
WT	secondrep	34	4	5	25	356.159	147.632	208.527	1069.02	PAR2.3	aak-1	37	35
WT	secondrep	34	4	5	26	320.643	143.074	177.569	1095.34	PAR2.3	aak-1	37	35
WT	secondrep	34	4	5	27	410.891	149.379	261.512	994.485	PAR2.3	aak-1	37	35
WT	secondrep	34	4	5	28	354.076	146.229	207.847	1099.82	PAR2.3	aak-1	37	35
WT	secondrep	34	4	5	29	275.418	145.993	129.425	859.896	PAR2.3	aak-1	37	35
WT	secondrep	34	4	5	30	365.153	143.813	221.341	940.798	PAR2.3	aak-1	37	35
WT	secondrep	34	4	5	31	393.396	142.987	250.409	1000.13	PAR2.3	aak-1	37	35
WT	secondrep	34	4	5	32	414.481	145.487	268.994	987.509	PAR2.3	aak-1	37	35
WT	secondrep	34	4	5	33	292.166	135.56	156.606	940.208	PAR2.3	aak-1	37	35
WT	secondrep	34	4	5	34	510.775	146.461	364.314	912.916	PAR2.3	aak-1	37	35
WT	secondrep	34	4	5	35	371.899	141.336	230.563	925.552	PAR2.3	aak-1	37	35
WT	secondrep	34	4	5	36	295.772	142.505	153.267	984.621	PAR2.3	aak-1	37	35
WT	secondrep	34	4	5	37	430.771	141.969	288.801	1019.28	PAR2.3	aak-1	37	35
D2	firstrep	34	4	5	1	240.942	135.777	105.165	828.841	PAR2.3	aak-1	38	38
D2	firstrep	34	4	5	2	244.459	136.539	107.92	839.273	PAR2.3	aak-1	38	38
D2	firstrep	34	4	5	3	288.525	135.808	152.717	951.547	PAR2.3	aak-1	38	38
D2	firstrep	34	4	5	4	258.118	137.768	120.35	721.165	PAR2.3	aak-1	38	38
D2	firstrep	34	4	5	5	230.612	141.206	89.406	823.044	PAR2.3	aak-1	38	38
D2	firstrep	34	4	5	6	306.941	145.215	161.726	944.272	PAR2.3	aak-1	38	38
D2	firstrep	34	4	5	7	224.68	140.667	84.013	798.107	PAR2.3	aak-1	38	38
D2	firstrep	34	4	5	8	273.1	145.295	127.805	831.506	PAR2.3	aak-1	38	38
D2	firstrep	34	4	5	9	225.416	136.049	89.367	802.309	PAR2.3	aak-1	38	38
D2	firstrep	34	4	5	10	288.713	141.523	147.19	950.643	PAR2.3	aak-1	38	38
D2	firstrep	34	4	5	11	264.937	145.268	119.669	881.958	PAR2.3	aak-1	38	38
D2	firstrep	34	4	5	12	255.593	146.05	109.543	878.377	PAR2.3	aak-1	38	38
D2	firstrep	34	4	5	13	285.761	148.188	137.573	815.412	PAR2.3	aak-1	38	38
D2	firstrep	34	4	5	14	285.401	146.931	138.47	1152.14	PAR2.3	aak-1	38	38
D2	firstrep	34	4	5	15	329.565	146.458	183.107	947.976	PAR2.3	aak-1	38	38
D2	firstrep	34	4	5	16	216.266	137.207	79.058	812.135	PAR2.3	aak-1	38	38
D2	firstrep	34	4	5	17	248.141	136.773	111.368	776.15	PAR2.3	aak-1	38	38
D2	firstrep	34	4	5	18	318.918	145.522	173.396	926.44	PAR2.3	aak-1	38	38
D2	firstrep	34	4	5	19	320.622	137.675	182.947	981.514	PAR2.3	aak-1	38	38
D2	firstrep	34	4	5	20	253.642	139.287	114.355	834.701	PAR2.3	aak-1	38	38
D2	firstrep	34	4	5	21	270.488	152.613	117.875	835.527	PAR2.3	aak-1	38	38
D2	firstrep	34	4	5	22	257.626	143.869	113.757	855.6	PAR2.3	aak-1	38	38
D2	firstrep	34	4	5	23	194.078	136.025	58.054	768.813	PAR2.3	aak-1	38	38
D2	firstrep	34	4	5	24	319.317	151.849	167.467	946.381	PAR2.3	aak-1	38	38
D2	firstrep	34	4	5	25	393.696	150.097	243.6	934.071	PAR2.3	aak-1	38	38
D2	firstrep	34	4	5	26	247.47	140.437	107.033	797.995	PAR2.3	aak-1	38	38
D2	firstrep	34	4	5	27	300.535	149.593	150.942	914.247	PAR2.3	aak-1	38	38
D2	firstrep	34	4	5	28	257.141	137.134	120.007	816.303	PAR2.3	aak-1	38	38
D2	firstrep	34	4	5	29	354.11	146.8	207.31	930.293	PAR2.3	aak-1	38	38
D2	firstrep	34	4	5	30	323.937	140.328	183.609	929.272	PAR2.3	aak-1	38	38
D2	firstrep	34	4	5	31	402.588	150.788	251.8	915.916	PAR2.3	aak-1	38	38
D2	firstrep	34	4	5	32	310.958	152.591	158.367	876.925	PAR2.3	aak-1	38	38
D2	firstrep	34	4	5	33	248.79	139.02	109.77	817.352	PAR2.3	aak-1	38	38
D2	firstrep	34	4	5	34	292.416	156.645	135.771	891.601	PAR2.3	aak-1	38	38
D2	firstrep	34	4	5	35	269.361	137.922	131.439	896.578	PAR2.3	aak-1	38	38
D2	firstrep	34	4	5	36	182.44	133.959	48.481	682.275	PAR2.3	aak-1	38	38
D2	firstrep	34	4	5	37	259.252	142.58	116.671	744.114	PAR2.3	aak-1	38	38
D2	firstrep	34	4	5	38	271.624	138.438	133.186	896.272	PAR2.3	aak-1	38	38
WT	firstrep	72	5	7	1	262.577	121.647	140.929	943.921	T01C8.1	aak-2	21	21
WT	firstrep	72	5	7	2	246.765	123.647	123.119	872.656	T01C8.1	aak-2	21	21
WT	firstrep	72	5	7	3	243.575	126.243	117.332	952.532	T01C8.1	aak-2	21	21
WT	firstrep	72	5	7	4	263.839	123.646	140.193	955.01	T01C8.1	aak-2	21	21
WT	firstrep	72	5	7	5	297.238	125.414	171.823	952.727	T01C8.1	aak-2	21	21
WT	firstrep	72	5	7	6	243.725	123.987	119.738	1038.37	T01C8.1	aak-2	21	21
WT	firstrep	72	5	7	7	345.338	127.83	217.508	967.166	T01C8.1	aak-2	21	21
WT	firstrep	72	5	7	8	278.709	124.338	154.371	953.201	T01C8.1	aak-2	21	21
WT	firstrep	72	5	7	9	133.715	139.154	-5.439	923.294	T01C8.1	aak-2	21	21
WT	firstrep	72	5	7	10	359.905	131.462	228.444	903.699	T01C8.1	aak-2	21	21
WT	firstrep	72	5	7	11	267.739	136.2	131.539	967.343	T01C8.1	aak-2	21	21
WT	firstrep	72	5	7	12	265.705	126.287	139.417	1001.07	T01C8.1	aak-2	21	21
WT	firstrep	72	5	7	13	238.624	123.078	115.546	975.211	T01C8.1	aak-2	21	21
WT	firstrep	72	5	7	14	284.605	124.778	159.827	750.225	T01C8.1	aak-2	21	21
WT	firstrep	72	5	7	15	308.993	124.501	184.492	886.668	T01C8.1	aak-2	21	21
WT	firstrep	72	5	7	16	276.711	128.191	148.52	892.902	T01C8.1	aak-2	21	21
WT	firstrep	72	5	7	17	287.989	129.357	158.632	957.059	T01C8.1	aak-2	21	21
WT	firstrep	72	5	7	18	253.358	146.876	106.481	908.396	T01C8.1	aak-2	21	21
WT	firstrep	72	5	7	19	202.014	167.264	34.75	917.428	T01C8.1	aak-2	21	21
WT	firstrep	72	5	7	20	296.337	126.904	169.433	948.522	T01C8.1	aak-2	21	21
WT	firstrep	72	5	7	21	287.415	124.288	163.127	929.665	T01C8.1	aak-2	21	21
WT	secondrep	72	5	7	1	235.598	130.447	105.151	951.172	T01C8.1	aak-2	30	26
WT	secondrep	72	5	7	2	305.674	134.656	171.017	802.702	T01C8.1	aak-2	30	26
WT	secondrep	72	5	7	3	291.692	132.42	159.273	853.76	T01C8.1	aak-2	30	26
WT	secondrep	72	5	7	4	230.863	137.761	93.103	749.096	T01C8.1	aak-2	30	26
WT	secondrep	72	5	7	5	272.689	137.478	135.211	865.333	T01C8.1	aak-2	30	26
WT	secondrep	72	5	7	6	282.322	131.446	150.876	783.669	T01C8.1	aak-2	30	26
WT	secondrep	72	5	7	7	197.537	182.214	15.322	821.797	T01C8.1	aak-2	30	26
WT	secondrep	72	5	7	8	303.38	140.182	163.197	907.2	T01C8.1	aak-2	30	26
WT	secondrep	72	5	7	9	295.435	142.141	153.294	905.961	T01C8.1	aak-2	30	26
WT	secondrep	72	5	7	10	312.452	140.771	171.681	884.495	T01C8.1	aak-2	30	26
WT	secondrep	72	5	7	11	291.242	136.419	154.824	834.447	T01C8.1	aak-2	30	26
WT	secondrep	72	5	7	12	299.288	160.88	138.407	939.752	T01C8.1	aak-2	30	26
WT	secondrep	72	5	7	13	281.587	146.093	135.494	875.028	T01C8.1	aak-2	30	26
WT	secondrep	72	5	7	14	341.921	141.016	200.905	829.073	T01C8.1	aak-2	30	26
WT	secondrep	72	5	7	15	290.701	136.648	154.053	854.851	T01C8.1	aak-2	30	26
WT	secondrep	72	5	7	16	235.731	138.912	96.819	842.741	T01C8.1	aak-2	30	26
WT	secondrep	72	5	7	17	306.569	131.686	174.883	620.976	T01C8.1	aak-2	30	26
WT	secondrep	72	5	7	18	336.05	146.757	189.292	844.321	T01C8.1	aak-2	30	26
WT	secondrep	72	5	7	19	131.202	131.04	0.162	1002.44	T01C8.1	aak-2	30	26
WT	secondrep	72	5	7	20	321.019	143.643	177.376	883.185	T01C8.1	aak-2	30	26
WT	secondrep	72	5	7	21	359.946	148.616	211.33	944.051	T01C8.1	aak-2	30	26
WT	secondrep	72	5	7	22	142.655	139.819	2.836	411.136	T01C8.1	aak-2	30	26
WT	secondrep	72	5	7	23	224.342	141.022	83.32	680.442	T01C8.1	aak-2	30	26
WT	secondrep	72	5	7	24	314.278	143.313	170.965	885.279	T01C8.1	aak-2	30	26
WT	secondrep	72	5	7	25	330.621	135.636	194.985	913.145	T01C8.1	aak-2	30	26
WT	secondrep	72	5	7	26	353.651	144.918	208.733	873.44	T01C8.1	aak-2	30	26
WT	secondrep	72	5	7	27	289.123	142.983	146.14	895.475	T01C8.1	aak-2	30	26
WT	secondrep	72	5	7	28	141.743	137.979	3.764	380.483	T01C8.1	aak-2	30	26
WT	secondrep	72	5	7	29	132.926	131.701	1.226	634.124	T01C8.1	aak-2	30	26
WT	secondrep	72	5	7	30	351.79	136.003	215.787	799.956	T01C8.1	aak-2	30	26
D2	secondrep	72	5	7	1	164.655	120.434	44.221	910.11	T01C8.1	aak-2	28	27
D2	secondrep	72	5	7	2	151.065	129.635	21.43	877.429	T01C8.1	aak-2	28	27
D2	secondrep	72	5	7	3	140.111	138.257	1.853	883.004	T01C8.1	aak-2	28	27
D2	secondrep	72	5	7	4	192.917	121.856	71.061	982.118	T01C8.1	aak-2	28	27
D2	secondrep	72	5	7	5	183.345	123.985	59.36	877.736	T01C8.1	aak-2	28	27
D2	secondrep	72	5	7	6	187.637	125.996	61.642	984.655	T01C8.1	aak-2	28	27
D2	secondrep	72	5	7	7	191.605	123.641	67.964	975.545	T01C8.1	aak-2	28	27
D2	secondrep	72	5	7	8	151.922	145.841	6.08	917.463	T01C8.1	aak-2	28	27
D2	secondrep	72	5	7	9	225.851	130.579	95.272	854.636	T01C8.1	aak-2	28	27
D2	secondrep	72	5	7	10	127.159	123.963	3.197	554.2	T01C8.1	aak-2	28	27
D2	secondrep	72	5	7	11	192.392	128.606	63.786	956.385	T01C8.1	aak-2	28	27
D2	secondrep	72	5	7	12	200.232	122.243	77.989	969.975	T01C8.1	aak-2	28	27
D2	secondrep	72	5	7	13	189.679	129.597	60.082	1008.77	T01C8.1	aak-2	28	27
D2	secondrep	72	5	7	14	176.819	126.981	49.837	913.92	T01C8.1	aak-2	28	27
D2	secondrep	72	5	7	15	180.659	122.266	58.393	843.504	T01C8.1	aak-2	28	27
D2	secondrep	72	5	7	16	179.826	123.036	56.79	967.11	T01C8.1	aak-2	28	27
D2	secondrep	72	5	7	17	193.147	122.675	70.472	837.582	T01C8.1	aak-2	28	27
D2	secondrep	72	5	7	18	192.357	127.659	64.698	904.792	T01C8.1	aak-2	28	27
D2	secondrep	72	5	7	19	204.118	122.952	81.167	945.098	T01C8.1	aak-2	28	27
D2	secondrep	72	5	7	20	170.793	149.096	21.696	949.767	T01C8.1	aak-2	28	27
D2	secondrep	72	5	7	21	195.388	123.182	72.205	948.815	T01C8.1	aak-2	28	27
D2	secondrep	72	5	7	22	200.069	133.158	66.911	868.36	T01C8.1	aak-2	28	27
D2	secondrep	72	5	7	23	187.176	127.943	59.233	968.237	T01C8.1	aak-2	28	27
D2	secondrep	72	5	7	24	183.579	123.842	59.737	1017.88	T01C8.1	aak-2	28	27
D2	secondrep	72	5	7	25	185.507	124.254	61.253	888.759	T01C8.1	aak-2	28	27
D2	secondrep	72	5	7	26	167.106	137.381	29.725	983.711	T01C8.1	aak-2	28	27
D2	secondrep	72	5	7	27	189.165	123.412	65.753	855.373	T01C8.1	aak-2	28	27
D2	secondrep	72	5	7	28	191.235	122.826	68.409	928.906	T01C8.1	aak-2	28	27
D2	firstrep	72	5	7	1	205.771	126.058	79.713	978.338	T01C8.1	aak-2	30	28
D2	firstrep	72	5	7	2	191.208	120.674	70.534	1005.74	T01C8.1	aak-2	30	28
D2	firstrep	72	5	7	3	153.538	120.675	32.863	801.254	T01C8.1	aak-2	30	28
D2	firstrep	72	5	7	4	210.607	122.476	88.131	1007.41	T01C8.1	aak-2	30	28
D2	firstrep	72	5	7	5	180.736	120.478	60.258	947.914	T01C8.1	aak-2	30	28
D2	firstrep	72	5	7	6	198.584	122.856	75.728	950.738	T01C8.1	aak-2	30	28
D2	firstrep	72	5	7	7	122.25	119.553	2.697	540.826	T01C8.1	aak-2	30	28
D2	firstrep	72	5	7	8	198.206	122.896	75.31	912.125	T01C8.1	aak-2	30	28
D2	firstrep	72	5	7	9	215.444	125.725	89.718	926.097	T01C8.1	aak-2	30	28
D2	firstrep	72	5	7	10	192.65	125.416	67.234	937.529	T01C8.1	aak-2	30	28
D2	firstrep	72	5	7	11	219.917	124.279	95.638	950.463	T01C8.1	aak-2	30	28
D2	firstrep	72	5	7	12	211.53	125.161	86.369	725.606	T01C8.1	aak-2	30	28
D2	firstrep	72	5	7	13	237.911	126.711	111.2	1027.38	T01C8.1	aak-2	30	28
D2	firstrep	72	5	7	14	209.718	125.875	83.844	905.216	T01C8.1	aak-2	30	28
D2	firstrep	72	5	7	15	207.557	124.961	82.596	920.305	T01C8.1	aak-2	30	28
D2	firstrep	72	5	7	16	217.45	128.769	88.681	869.095	T01C8.1	aak-2	30	28
D2	firstrep	72	5	7	17	221.453	126.418	95.035	939.003	T01C8.1	aak-2	30	28
D2	firstrep	72	5	7	18	243.482	130.53	112.952	844.61	T01C8.1	aak-2	30	28
D2	firstrep	72	5	7	19	243.537	127.131	116.406	978.441	T01C8.1	aak-2	30	28
D2	firstrep	72	5	7	20	205.75	127.5	78.25	989.02	T01C8.1	aak-2	30	28
D2	firstrep	72	5	7	21	202.574	126.906	75.668	1093.48	T01C8.1	aak-2	30	28
D2	firstrep	72	5	7	22	198.932	127.021	71.911	889.357	T01C8.1	aak-2	30	28
D2	firstrep	72	5	7	23	218.663	127.474	91.189	919.38	T01C8.1	aak-2	30	28
D2	firstrep	72	5	7	24	143.901	124.875	19.026	1069.95	T01C8.1	aak-2	30	28
D2	firstrep	72	5	7	25	220.927	126.317	94.61	925.462	T01C8.1	aak-2	30	28
D2	firstrep	72	5	7	26	220.285	128.807	91.478	788.576	T01C8.1	aak-2	30	28
D2	firstrep	72	5	7	27	207.722	128.229	79.493	1046.84	T01C8.1	aak-2	30	28
D2	firstrep	72	5	7	28	128.09	125.691	2.399	437.222	T01C8.1	aak-2	30	28
D2	firstrep	72	5	7	29	200.964	122.784	78.18	990.062	T01C8.1	aak-2	30	28
D2	firstrep	72	5	7	30	206.77	124.158	82.612	953.455	T01C8.1	aak-2	30	28
D2	firstrep	71	1	6	1	174.344	120.177	54.167	720.291	F55F3.1	aakb-1	16	15
D2	firstrep	71	1	6	2	172.358	122.451	49.906	911.029	F55F3.1	aakb-1	16	15
D2	firstrep	71	1	6	3	173.329	120.293	53.036	820.722	F55F3.1	aakb-1	16	15
D2	firstrep	71	1	6	4	195.903	127.254	68.65	908.208	F55F3.1	aakb-1	16	15
D2	firstrep	71	1	6	5	198.691	126.18	72.511	904.836	F55F3.1	aakb-1	16	15
D2	firstrep	71	1	6	6	199.496	126.81	72.686	983.195	F55F3.1	aakb-1	16	15
D2	firstrep	71	1	6	7	197.992	127.794	70.198	920.225	F55F3.1	aakb-1	16	15
D2	firstrep	71	1	6	8	198.997	127.872	71.124	951.413	F55F3.1	aakb-1	16	15
D2	firstrep	71	1	6	9	121.036	121.591	-0.555	639.111	F55F3.1	aakb-1	16	15
D2	firstrep	71	1	6	10	176.979	127.945	49.033	951.342	F55F3.1	aakb-1	16	15
D2	firstrep	71	1	6	11	167.404	127.394	40.01	814.907	F55F3.1	aakb-1	16	15
D2	firstrep	71	1	6	12	204.372	126.777	77.595	827.08	F55F3.1	aakb-1	16	15
D2	firstrep	71	1	6	13	186.89	124.13	62.76	842.89	F55F3.1	aakb-1	16	15
D2	firstrep	71	1	6	14	191.469	126.402	65.068	935.82	F55F3.1	aakb-1	16	15
D2	firstrep	71	1	6	15	177.332	122.316	55.016	890.596	F55F3.1	aakb-1	16	15
D2	firstrep	71	1	6	16	208.778	122.781	85.997	867.323	F55F3.1	aakb-1	16	15
WT	firstrep	71	1	6	1	341.973	139.697	202.276	982.834	F55F3.1	aakb-1	25	23
WT	firstrep	71	1	6	2	305.578	138.234	167.344	923.837	F55F3.1	aakb-1	25	23
WT	firstrep	71	1	6	3	271.142	138.155	132.987	1060.27	F55F3.1	aakb-1	25	23
WT	firstrep	71	1	6	4	302.205	140.378	161.827	1006.08	F55F3.1	aakb-1	25	23
WT	firstrep	71	1	6	5	144.381	143.142	1.239	492.97	F55F3.1	aakb-1	25	23
WT	firstrep	71	1	6	6	384.267	143.424	240.843	883.356	F55F3.1	aakb-1	25	23
WT	firstrep	71	1	6	7	160.262	131.702	28.56	713.51	F55F3.1	aakb-1	25	23
WT	firstrep	71	1	6	8	414.118	147.418	266.7	1143.82	F55F3.1	aakb-1	25	23
WT	firstrep	71	1	6	9	201.385	139.286	62.099	677.87	F55F3.1	aakb-1	25	23
WT	firstrep	71	1	6	10	340.536	141.486	199.05	1001.72	F55F3.1	aakb-1	25	23
WT	firstrep	71	1	6	11	190.755	143.568	47.187	778.902	F55F3.1	aakb-1	25	23
WT	firstrep	71	1	6	12	503.989	149.684	354.304	863.514	F55F3.1	aakb-1	25	23
WT	firstrep	71	1	6	13	370.822	147.371	223.45	1068.49	F55F3.1	aakb-1	25	23
WT	firstrep	71	1	6	14	199.644	134.106	65.538	778.013	F55F3.1	aakb-1	25	23
WT	firstrep	71	1	6	15	199.675	142.589	57.086	623.324	F55F3.1	aakb-1	25	23
WT	firstrep	71	1	6	16	423.08	148.116	274.963	970.976	F55F3.1	aakb-1	25	23
WT	firstrep	71	1	6	17	187.635	135.859	51.777	1030.1	F55F3.1	aakb-1	25	23
WT	firstrep	71	1	6	18	413.104	147.846	265.258	1014.12	F55F3.1	aakb-1	25	23
WT	firstrep	71	1	6	19	248.01	140.528	107.483	688.535	F55F3.1	aakb-1	25	23
WT	firstrep	71	1	6	20	271.721	142.444	129.277	734.988	F55F3.1	aakb-1	25	23
WT	firstrep	71	1	6	21	223.524	139.914	83.61	892.756	F55F3.1	aakb-1	25	23
WT	firstrep	71	1	6	22	433.82	143.235	290.585	850.187	F55F3.1	aakb-1	25	23
WT	firstrep	71	1	6	23	301.691	135.443	166.248	860.958	F55F3.1	aakb-1	25	23
WT	firstrep	71	1	6	24	366.777	141.431	225.346	989.935	F55F3.1	aakb-1	25	23
WT	firstrep	71	1	6	25	307.157	135.638	171.52	859.863	F55F3.1	aakb-1	25	23
WT	secondrep	71	1	6	1	322.153	145.489	176.664	818.267	F55F3.1	aakb-1	33	28
WT	secondrep	71	1	6	2	307.146	139.507	167.639	864.979	F55F3.1	aakb-1	33	28
WT	secondrep	71	1	6	3	132.759	129.809	2.95	512.06	F55F3.1	aakb-1	33	28
WT	secondrep	71	1	6	4	288.345	144.018	144.327	865.799	F55F3.1	aakb-1	33	28
WT	secondrep	71	1	6	5	309.508	148.028	161.481	878.683	F55F3.1	aakb-1	33	28
WT	secondrep	71	1	6	6	136.334	130.243	6.091	398.312	F55F3.1	aakb-1	33	28
WT	secondrep	71	1	6	7	436.721	148.262	288.459	829.474	F55F3.1	aakb-1	33	28
WT	secondrep	71	1	6	8	356.033	142.985	213.048	926.116	F55F3.1	aakb-1	33	28
WT	secondrep	71	1	6	9	280.834	142.233	138.601	857.556	F55F3.1	aakb-1	33	28
WT	secondrep	71	1	6	10	319.619	143.587	176.032	939.107	F55F3.1	aakb-1	33	28
WT	secondrep	71	1	6	11	382.865	152.924	229.94	865.994	F55F3.1	aakb-1	33	28
WT	secondrep	71	1	6	12	244.177	152.341	91.835	1037.88	F55F3.1	aakb-1	33	28
WT	secondrep	71	1	6	13	376.862	146.409	230.453	886.006	F55F3.1	aakb-1	33	28
WT	secondrep	71	1	6	14	291.989	138.947	153.042	881.697	F55F3.1	aakb-1	33	28
WT	secondrep	71	1	6	15	354.671	150.104	204.567	866.753	F55F3.1	aakb-1	33	28
WT	secondrep	71	1	6	16	293.465	145.375	148.09	1050.8	F55F3.1	aakb-1	33	28
WT	secondrep	71	1	6	17	462.92	150.716	312.204	861.659	F55F3.1	aakb-1	33	28
WT	secondrep	71	1	6	18	141.695	136.065	5.63	416.264	F55F3.1	aakb-1	33	28
WT	secondrep	71	1	6	19	351.985	161.283	190.702	885.243	F55F3.1	aakb-1	33	28
WT	secondrep	71	1	6	20	419.468	157.4	262.068	900.126	F55F3.1	aakb-1	33	28
WT	secondrep	71	1	6	21	306.281	140.941	165.339	810.405	F55F3.1	aakb-1	33	28
WT	secondrep	71	1	6	22	352.86	166.405	186.456	886.93	F55F3.1	aakb-1	33	28
WT	secondrep	71	1	6	23	261.69	131.817	129.873	939.323	F55F3.1	aakb-1	33	28
WT	secondrep	71	1	6	24	363.773	147.727	216.045	872.567	F55F3.1	aakb-1	33	28
WT	secondrep	71	1	6	25	142.938	145.146	-2.208	618.509	F55F3.1	aakb-1	33	28
WT	secondrep	71	1	6	26	428.087	175.874	252.213	903.078	F55F3.1	aakb-1	33	28
WT	secondrep	71	1	6	27	174.37	174.553	-0.183	506.505	F55F3.1	aakb-1	33	28
WT	secondrep	71	1	6	28	380.898	171.334	209.564	877.731	F55F3.1	aakb-1	33	28
WT	secondrep	71	1	6	29	412.099	160.311	251.788	893.373	F55F3.1	aakb-1	33	28
WT	secondrep	71	1	6	30	408.688	141.697	266.991	868.999	F55F3.1	aakb-1	33	28
WT	secondrep	71	1	6	31	368.835	140.381	228.454	823.04	F55F3.1	aakb-1	33	28
WT	secondrep	71	1	6	32	323.995	149.052	174.943	868.288	F55F3.1	aakb-1	33	28
WT	secondrep	71	1	6	33	317.115	138.226	178.888	880.382	F55F3.1	aakb-1	33	28
D2	secondrep	71	1	6	1	162.825	119.862	42.963	902.343	F55F3.1	aakb-1	29	28
D2	secondrep	71	1	6	2	169.619	122.583	47.037	796.174	F55F3.1	aakb-1	29	28
D2	secondrep	71	1	6	3	162.934	121.375	41.559	931.452	F55F3.1	aakb-1	29	28
D2	secondrep	71	1	6	4	174.873	124.256	50.616	988.202	F55F3.1	aakb-1	29	28
D2	secondrep	71	1	6	5	120.483	121.527	-1.044	1248.49	F55F3.1	aakb-1	29	28
D2	secondrep	71	1	6	6	166.718	122.424	44.294	914.375	F55F3.1	aakb-1	29	28
D2	secondrep	71	1	6	7	169.704	123.901	45.803	914.207	F55F3.1	aakb-1	29	28
D2	secondrep	71	1	6	8	178.297	125.158	53.139	946.82	F55F3.1	aakb-1	29	28
D2	secondrep	71	1	6	9	179.816	125.498	54.318	927.899	F55F3.1	aakb-1	29	28
D2	secondrep	71	1	6	10	157.145	124.444	32.701	944.167	F55F3.1	aakb-1	29	28
D2	secondrep	71	1	6	11	175.865	124.119	51.746	868.07	F55F3.1	aakb-1	29	28
D2	secondrep	71	1	6	12	188.477	126.763	61.714	852.303	F55F3.1	aakb-1	29	28
D2	secondrep	71	1	6	13	140.571	140.04	0.53	1009.18	F55F3.1	aakb-1	29	28
D2	secondrep	71	1	6	14	171.011	127.455	43.556	920.709	F55F3.1	aakb-1	29	28
D2	secondrep	71	1	6	15	184.875	129.098	55.777	938.972	F55F3.1	aakb-1	29	28
D2	secondrep	71	1	6	16	197.089	129.372	67.717	919.365	F55F3.1	aakb-1	29	28
D2	secondrep	71	1	6	17	170.097	123.621	46.477	884.398	F55F3.1	aakb-1	29	28
D2	secondrep	71	1	6	18	184.73	127.826	56.904	938.14	F55F3.1	aakb-1	29	28
D2	secondrep	71	1	6	19	127.538	125.472	2.066	519.17	F55F3.1	aakb-1	29	28
D2	secondrep	71	1	6	20	162.166	130.334	31.832	816.14	F55F3.1	aakb-1	29	28
D2	secondrep	71	1	6	21	162.822	126.263	36.559	1003.84	F55F3.1	aakb-1	29	28
D2	secondrep	71	1	6	22	163.33	128.028	35.301	838.927	F55F3.1	aakb-1	29	28
D2	secondrep	71	1	6	23	171.207	121.063	50.144	772.585	F55F3.1	aakb-1	29	28
D2	secondrep	71	1	6	24	185.744	127.842	57.902	957.249	F55F3.1	aakb-1	29	28
D2	secondrep	71	1	6	25	196.323	124.162	72.16	836.326	F55F3.1	aakb-1	29	28
D2	secondrep	71	1	6	26	166.773	124.773	42	964.805	F55F3.1	aakb-1	29	28
D2	secondrep	71	1	6	27	175.819	125.373	50.447	966.023	F55F3.1	aakb-1	29	28
D2	secondrep	71	1	6	28	171.601	122.645	48.956	864.423	F55F3.1	aakb-1	29	28
D2	secondrep	71	1	6	29	174.679	123.15	51.528	942.138	F55F3.1	aakb-1	29	28
D2	secondrep	36	7	10	1	195.416	131.03	64.385	850.442	Y47D3A.q	aakb-2	36	31
D2	secondrep	36	7	10	2	181.852	133.66	48.192	991.832	Y47D3A.q	aakb-2	36	31
D2	secondrep	36	7	10	3	203.105	132.656	70.449	1087.38	Y47D3A.q	aakb-2	36	31
D2	secondrep	36	7	10	4	195.616	132.391	63.226	862.925	Y47D3A.q	aakb-2	36	31
D2	secondrep	36	7	10	5	240.28	140.422	99.859	997.91	Y47D3A.q	aakb-2	36	31
D2	secondrep	36	7	10	6	136.125	135.529	0.596	510.546	Y47D3A.q	aakb-2	36	31
D2	secondrep	36	7	10	7	270.383	141.636	128.747	905.678	Y47D3A.q	aakb-2	36	31
D2	secondrep	36	7	10	8	139.597	140.201	-0.603	754.274	Y47D3A.q	aakb-2	36	31
D2	secondrep	36	7	10	9	224.713	140.943	83.77	950.78	Y47D3A.q	aakb-2	36	31
D2	secondrep	36	7	10	10	263.978	143.515	120.463	920.604	Y47D3A.q	aakb-2	36	31
D2	secondrep	36	7	10	11	132.786	134.528	-1.742	682.281	Y47D3A.q	aakb-2	36	31
D2	secondrep	36	7	10	12	303.071	145.214	157.857	994.108	Y47D3A.q	aakb-2	36	31
D2	secondrep	36	7	10	13	154.683	152.864	1.818	836.383	Y47D3A.q	aakb-2	36	31
D2	secondrep	36	7	10	14	236.253	139.364	96.889	1002.47	Y47D3A.q	aakb-2	36	31
D2	secondrep	36	7	10	15	209.521	136.344	73.177	772.632	Y47D3A.q	aakb-2	36	31
D2	secondrep	36	7	10	16	274.788	148.577	126.211	991.119	Y47D3A.q	aakb-2	36	31
D2	secondrep	36	7	10	17	146.821	146.023	0.798	502.137	Y47D3A.q	aakb-2	36	31
D2	secondrep	36	7	10	18	223.015	138.614	84.402	895.413	Y47D3A.q	aakb-2	36	31
D2	secondrep	36	7	10	19	150.136	149.452	0.684	542.447	Y47D3A.q	aakb-2	36	31
D2	secondrep	36	7	10	20	261.293	134.878	126.415	804.04	Y47D3A.q	aakb-2	36	31
D2	secondrep	36	7	10	21	141.687	142.428	-0.74	652.545	Y47D3A.q	aakb-2	36	31
D2	secondrep	36	7	10	22	281.326	147.453	133.873	960.131	Y47D3A.q	aakb-2	36	31
D2	secondrep	36	7	10	23	231.629	138.355	93.273	816.099	Y47D3A.q	aakb-2	36	31
D2	secondrep	36	7	10	24	243.916	145.358	98.558	910.265	Y47D3A.q	aakb-2	36	31
D2	secondrep	36	7	10	25	281.666	145.306	136.359	876.254	Y47D3A.q	aakb-2	36	31
D2	secondrep	36	7	10	26	236.241	140.09	96.152	1498.08	Y47D3A.q	aakb-2	36	31
D2	secondrep	36	7	10	27	233.582	135.349	98.233	1025.74	Y47D3A.q	aakb-2	36	31
D2	secondrep	36	7	10	28	261.884	142.052	119.831	919.634	Y47D3A.q	aakb-2	36	31
D2	secondrep	36	7	10	29	201.602	136.967	64.635	1099.82	Y47D3A.q	aakb-2	36	31
D2	secondrep	36	7	10	30	215.673	133.388	82.285	702.312	Y47D3A.q	aakb-2	36	31
D2	secondrep	36	7	10	31	232.529	138.592	93.937	1046.65	Y47D3A.q	aakb-2	36	31
D2	secondrep	36	7	10	32	207.022	141.458	65.564	925.556	Y47D3A.q	aakb-2	36	31
D2	secondrep	36	7	10	33	181.095	135.565	45.53	1145.45	Y47D3A.q	aakb-2	36	31
D2	secondrep	36	7	10	34	186.935	135.919	51.016	837.977	Y47D3A.q	aakb-2	36	31
D2	secondrep	36	7	10	35	221.445	136.61	84.835	888.192	Y47D3A.q	aakb-2	36	31
D2	secondrep	36	7	10	36	238.529	139.941	98.588	627.598	Y47D3A.q	aakb-2	36	31
WT	secondrep	36	7	10	1	131.614	130.853	0.76	523.471	Y47D3A.q	aakb-2	36	33
WT	secondrep	36	7	10	2	275.343	132.83	142.513	895.294	Y47D3A.q	aakb-2	36	33
WT	secondrep	36	7	10	3	244.645	134.431	110.215	990.9	Y47D3A.q	aakb-2	36	33
WT	secondrep	36	7	10	4	316.524	138.581	177.944	1478.85	Y47D3A.q	aakb-2	36	33
WT	secondrep	36	7	10	5	267.487	134.704	132.783	1027.97	Y47D3A.q	aakb-2	36	33
WT	secondrep	36	7	10	6	251.377	140.659	110.718	947.307	Y47D3A.q	aakb-2	36	33
WT	secondrep	36	7	10	7	285.065	139.555	145.51	1002.55	Y47D3A.q	aakb-2	36	33
WT	secondrep	36	7	10	8	135.886	131.25	4.635	591.486	Y47D3A.q	aakb-2	36	33
WT	secondrep	36	7	10	9	324.401	158.73	165.671	1013.58	Y47D3A.q	aakb-2	36	33
WT	secondrep	36	7	10	10	537.962	146.693	391.269	955.056	Y47D3A.q	aakb-2	36	33
WT	secondrep	36	7	10	11	309.63	138.787	170.843	1002.22	Y47D3A.q	aakb-2	36	33
WT	secondrep	36	7	10	12	343.8	144.35	199.45	1029.88	Y47D3A.q	aakb-2	36	33
WT	secondrep	36	7	10	13	311.732	139.55	172.182	955.328	Y47D3A.q	aakb-2	36	33
WT	secondrep	36	7	10	14	412.49	150.265	262.225	881.403	Y47D3A.q	aakb-2	36	33
WT	secondrep	36	7	10	15	389.028	143.197	245.832	961.117	Y47D3A.q	aakb-2	36	33
WT	secondrep	36	7	10	16	406.764	144.211	262.553	977.754	Y47D3A.q	aakb-2	36	33
WT	secondrep	36	7	10	17	355.609	151.715	203.894	936.467	Y47D3A.q	aakb-2	36	33
WT	secondrep	36	7	10	18	284.426	144.037	140.389	1068.93	Y47D3A.q	aakb-2	36	33
WT	secondrep	36	7	10	19	576.339	151.8	424.539	941.339	Y47D3A.q	aakb-2	36	33
WT	secondrep	36	7	10	20	305.653	135.947	169.706	939.091	Y47D3A.q	aakb-2	36	33
WT	secondrep	36	7	10	21	340.339	143.828	196.511	1028.94	Y47D3A.q	aakb-2	36	33
WT	secondrep	36	7	10	22	319.318	147.94	171.378	917.574	Y47D3A.q	aakb-2	36	33
WT	secondrep	36	7	10	23	410.013	150.674	259.339	909.913	Y47D3A.q	aakb-2	36	33
WT	secondrep	36	7	10	24	239.251	139.069	100.182	993.887	Y47D3A.q	aakb-2	36	33
WT	secondrep	36	7	10	25	226.652	144.962	81.69	639.044	Y47D3A.q	aakb-2	36	33
WT	secondrep	36	7	10	26	434.93	147.912	287.019	1002.48	Y47D3A.q	aakb-2	36	33
WT	secondrep	36	7	10	27	477.388	146.388	331	935.129	Y47D3A.q	aakb-2	36	33
WT	secondrep	36	7	10	28	326.382	139.447	186.935	846.63	Y47D3A.q	aakb-2	36	33
WT	secondrep	36	7	10	29	442.466	146.283	296.182	928.718	Y47D3A.q	aakb-2	36	33
WT	secondrep	36	7	10	30	435.568	146.112	289.456	842.063	Y47D3A.q	aakb-2	36	33
WT	secondrep	36	7	10	31	345.793	144.661	201.132	811.998	Y47D3A.q	aakb-2	36	33
WT	secondrep	36	7	10	32	389.498	149.061	240.437	894.672	Y47D3A.q	aakb-2	36	33
WT	secondrep	36	7	10	33	430.158	157.639	272.52	756.761	Y47D3A.q	aakb-2	36	33
WT	secondrep	36	7	10	34	301.395	138.635	162.76	878.148	Y47D3A.q	aakb-2	36	33
WT	secondrep	36	7	10	35	398.183	139.336	258.847	950.604	Y47D3A.q	aakb-2	36	33
WT	secondrep	36	7	10	36	352.83	139.802	213.028	903.839	Y47D3A.q	aakb-2	36	33
WT	firstrep	36	7	10	1	379.415	139.365	240.05	817.071	Y47D3A.q	aakb-2	46	45
WT	firstrep	36	7	10	2	332.404	138.305	194.099	822.753	Y47D3A.q	aakb-2	46	45
WT	firstrep	36	7	10	3	226.735	135.762	90.973	703.519	Y47D3A.q	aakb-2	46	45
WT	firstrep	36	7	10	4	334.441	142.436	192.004	872.715	Y47D3A.q	aakb-2	46	45
WT	firstrep	36	7	10	5	340.618	142.323	198.295	856.498	Y47D3A.q	aakb-2	46	45
WT	firstrep	36	7	10	6	449.338	148.536	300.802	832.134	Y47D3A.q	aakb-2	46	45
WT	firstrep	36	7	10	7	347.422	144.713	202.709	1326.5	Y47D3A.q	aakb-2	46	45
WT	firstrep	36	7	10	8	352.993	143.291	209.702	973.759	Y47D3A.q	aakb-2	46	45
WT	firstrep	36	7	10	9	464.712	152.124	312.588	853.468	Y47D3A.q	aakb-2	46	45
WT	firstrep	36	7	10	10	347.302	141.957	205.344	798.137	Y47D3A.q	aakb-2	46	45
WT	firstrep	36	7	10	11	365.328	146.445	218.882	889.374	Y47D3A.q	aakb-2	46	45
WT	firstrep	36	7	10	12	372.694	142.863	229.831	771.779	Y47D3A.q	aakb-2	46	45
WT	firstrep	36	7	10	13	507.191	155.516	351.675	921.382	Y47D3A.q	aakb-2	46	45
WT	firstrep	36	7	10	14	394.254	143.056	251.198	922.045	Y47D3A.q	aakb-2	46	45
WT	firstrep	36	7	10	15	387.315	141.096	246.22	814.738	Y47D3A.q	aakb-2	46	45
WT	firstrep	36	7	10	16	445.363	169.931	275.432	815.893	Y47D3A.q	aakb-2	46	45
WT	firstrep	36	7	10	17	398.483	151.889	246.594	821.428	Y47D3A.q	aakb-2	46	45
WT	firstrep	36	7	10	18	358.1	139.088	219.012	766.856	Y47D3A.q	aakb-2	46	45
WT	firstrep	36	7	10	19	384.936	151.16	233.777	898.296	Y47D3A.q	aakb-2	46	45
WT	firstrep	36	7	10	20	377.442	144.151	233.29	932.241	Y47D3A.q	aakb-2	46	45
WT	firstrep	36	7	10	21	402.832	141.74	261.092	856.265	Y47D3A.q	aakb-2	46	45
WT	firstrep	36	7	10	22	438.334	153.322	285.012	836.271	Y47D3A.q	aakb-2	46	45
WT	firstrep	36	7	10	23	152.825	148.731	4.093	612.948	Y47D3A.q	aakb-2	46	45
WT	firstrep	36	7	10	24	453.019	158.465	294.554	882.296	Y47D3A.q	aakb-2	46	45
WT	firstrep	36	7	10	25	568.433	157.689	410.744	758.889	Y47D3A.q	aakb-2	46	45
WT	firstrep	36	7	10	26	291.516	137.328	154.189	921.062	Y47D3A.q	aakb-2	46	45
WT	firstrep	36	7	10	27	424.026	156.579	267.447	789.671	Y47D3A.q	aakb-2	46	45
WT	firstrep	36	7	10	28	365.719	145.513	220.206	955.489	Y47D3A.q	aakb-2	46	45
WT	firstrep	36	7	10	29	425.952	152.666	273.286	874.105	Y47D3A.q	aakb-2	46	45
WT	firstrep	36	7	10	30	154.963	151.335	3.628	952.168	Y47D3A.q	aakb-2	46	45
WT	firstrep	36	7	10	31	350.431	152.43	198.001	847.268	Y47D3A.q	aakb-2	46	45
WT	firstrep	36	7	10	32	364.847	144.653	220.194	855.45	Y47D3A.q	aakb-2	46	45
WT	firstrep	36	7	10	33	328.384	148.369	180.016	708.713	Y47D3A.q	aakb-2	46	45
WT	firstrep	36	7	10	34	454.117	147.658	306.459	831.372	Y47D3A.q	aakb-2	46	45
WT	firstrep	36	7	10	35	332.86	141.078	191.781	719.896	Y47D3A.q	aakb-2	46	45
WT	firstrep	36	7	10	36	417.544	149.604	267.94	867.603	Y47D3A.q	aakb-2	46	45
WT	firstrep	36	7	10	37	461.423	140.532	320.891	692.581	Y47D3A.q	aakb-2	46	45
WT	firstrep	36	7	10	38	373.844	145.612	228.232	870.778	Y47D3A.q	aakb-2	46	45
WT	firstrep	36	7	10	39	280.462	145.563	134.9	772.835	Y47D3A.q	aakb-2	46	45
WT	firstrep	36	7	10	40	338.921	149.327	189.594	887.67	Y47D3A.q	aakb-2	46	45
WT	firstrep	36	7	10	41	377.754	141.559	236.195	911.785	Y47D3A.q	aakb-2	46	45
WT	firstrep	36	7	10	42	264.664	139.839	124.825	704.272	Y47D3A.q	aakb-2	46	45
WT	firstrep	36	7	10	43	360.378	138.994	221.383	814.185	Y47D3A.q	aakb-2	46	45
WT	firstrep	36	7	10	44	353.341	141.853	211.487	720.971	Y47D3A.q	aakb-2	46	45
WT	firstrep	36	7	10	45	390.39	140.966	249.424	883.69	Y47D3A.q	aakb-2	46	45
WT	firstrep	36	7	10	46	295.346	136.124	159.222	725.907	Y47D3A.q	aakb-2	46	45
D2	firstrep	36	7	10	1	212.078	137.362	74.715	816.161	Y47D3A.q	aakb-2	52	50
D2	firstrep	36	7	10	2	238.715	137.824	100.891	863.279	Y47D3A.q	aakb-2	52	50
D2	firstrep	36	7	10	3	212.159	136.512	75.646	833.505	Y47D3A.q	aakb-2	52	50
D2	firstrep	36	7	10	4	262.845	139.42	123.425	945.081	Y47D3A.q	aakb-2	52	50
D2	firstrep	36	7	10	5	210.495	135.754	74.74	829.261	Y47D3A.q	aakb-2	52	50
D2	firstrep	36	7	10	6	235.714	138.744	96.97	780.179	Y47D3A.q	aakb-2	52	50
D2	firstrep	36	7	10	7	196.839	138.534	58.305	717.185	Y47D3A.q	aakb-2	52	50
D2	firstrep	36	7	10	8	214.966	141.316	73.65	681.574	Y47D3A.q	aakb-2	52	50
D2	firstrep	36	7	10	9	242.171	143.23	98.941	778.52	Y47D3A.q	aakb-2	52	50
D2	firstrep	36	7	10	10	216.816	141.642	75.173	938.584	Y47D3A.q	aakb-2	52	50
D2	firstrep	36	7	10	11	201.897	138.023	63.874	750.317	Y47D3A.q	aakb-2	52	50
D2	firstrep	36	7	10	12	262.047	145.508	116.539	938.368	Y47D3A.q	aakb-2	52	50
D2	firstrep	36	7	10	13	284.125	140.325	143.8	1019.31	Y47D3A.q	aakb-2	52	50
D2	firstrep	36	7	10	14	344.667	148.679	195.987	943.324	Y47D3A.q	aakb-2	52	50
D2	firstrep	36	7	10	15	254.822	145.194	109.628	839.888	Y47D3A.q	aakb-2	52	50
D2	firstrep	36	7	10	16	218.082	138.577	79.506	642.328	Y47D3A.q	aakb-2	52	50
D2	firstrep	36	7	10	17	243.365	147.6	95.764	785.274	Y47D3A.q	aakb-2	52	50
D2	firstrep	36	7	10	18	288.223	147.3	140.922	945.328	Y47D3A.q	aakb-2	52	50
D2	firstrep	36	7	10	19	328.052	140.595	187.457	918.43	Y47D3A.q	aakb-2	52	50
D2	firstrep	36	7	10	20	261.685	147.67	114.015	844.192	Y47D3A.q	aakb-2	52	50
D2	firstrep	36	7	10	21	402.22	152.503	249.718	800.866	Y47D3A.q	aakb-2	52	50
D2	firstrep	36	7	10	22	318.204	151.355	166.848	852	Y47D3A.q	aakb-2	52	50
D2	firstrep	36	7	10	23	294.087	139.883	154.204	965.737	Y47D3A.q	aakb-2	52	50
D2	firstrep	36	7	10	24	386.861	157.815	229.046	851.96	Y47D3A.q	aakb-2	52	50
D2	firstrep	36	7	10	25	242.25	140.272	101.979	932.38	Y47D3A.q	aakb-2	52	50
D2	firstrep	36	7	10	26	232.116	133.092	99.024	747.345	Y47D3A.q	aakb-2	52	50
D2	firstrep	36	7	10	27	356.322	151.311	205.011	954.875	Y47D3A.q	aakb-2	52	50
D2	firstrep	36	7	10	28	374.413	155.907	218.505	845.184	Y47D3A.q	aakb-2	52	50
D2	firstrep	36	7	10	29	403.034	154.937	248.097	912.916	Y47D3A.q	aakb-2	52	50
D2	firstrep	36	7	10	30	311.219	154.552	156.667	835.116	Y47D3A.q	aakb-2	52	50
D2	firstrep	36	7	10	31	313.972	139.756	174.216	895.749	Y47D3A.q	aakb-2	52	50
D2	firstrep	36	7	10	32	273.475	142.721	130.755	800.459	Y47D3A.q	aakb-2	52	50
D2	firstrep	36	7	10	33	283.935	149.952	133.983	828.875	Y47D3A.q	aakb-2	52	50
D2	firstrep	36	7	10	34	320.158	147.757	172.401	832.656	Y47D3A.q	aakb-2	52	50
D2	firstrep	36	7	10	35	273.672	141.42	132.252	870.658	Y47D3A.q	aakb-2	52	50
D2	firstrep	36	7	10	36	313.924	143.454	170.47	841.236	Y47D3A.q	aakb-2	52	50
D2	firstrep	36	7	10	37	239.358	146.103	93.255	808.56	Y47D3A.q	aakb-2	52	50
D2	firstrep	36	7	10	38	299.521	151.405	148.115	817.794	Y47D3A.q	aakb-2	52	50
D2	firstrep	36	7	10	39	239.626	145.878	93.748	860.314	Y47D3A.q	aakb-2	52	50
D2	firstrep	36	7	10	40	352.931	150.019	202.912	925.845	Y47D3A.q	aakb-2	52	50
D2	firstrep	36	7	10	41	342.527	146.554	195.973	893.137	Y47D3A.q	aakb-2	52	50
D2	firstrep	36	7	10	42	309.479	138.957	170.522	806.94	Y47D3A.q	aakb-2	52	50
D2	firstrep	36	7	10	43	327.656	147.335	180.321	879.648	Y47D3A.q	aakb-2	52	50
D2	firstrep	36	7	10	44	278.713	145.949	132.763	988.697	Y47D3A.q	aakb-2	52	50
D2	firstrep	36	7	10	45	283.664	141.81	141.854	860.892	Y47D3A.q	aakb-2	52	50
D2	firstrep	36	7	10	46	243.981	142.655	101.326	857.273	Y47D3A.q	aakb-2	52	50
D2	firstrep	36	7	10	47	243.618	139.02	104.598	870.111	Y47D3A.q	aakb-2	52	50
D2	firstrep	36	7	10	48	141.43	136.891	4.539	388.664	Y47D3A.q	aakb-2	52	50
D2	firstrep	36	7	10	49	233.023	144.114	88.909	736.635	Y47D3A.q	aakb-2	52	50
D2	firstrep	36	7	10	50	227.717	139.196	88.521	740.872	Y47D3A.q	aakb-2	52	50
D2	firstrep	36	7	10	51	251.262	136.659	114.603	763.17	Y47D3A.q	aakb-2	52	50
D2	firstrep	36	7	10	52	185.806	135.316	50.49	697.947	Y47D3A.q	aakb-2	52	50
WT	firstrep	37	4	9	1	129.936	128.541	1.395	381.98	Y111B2C.h	aakg-1	25	3
WT	firstrep	37	4	9	2	131.523	130.097	1.426	306.55	Y111B2C.h	aakg-1	25	3
WT	firstrep	37	4	9	3	132.761	131.383	1.378	374.108	Y111B2C.h	aakg-1	25	3
WT	firstrep	37	4	9	4	135.286	133.945	1.341	357.033	Y111B2C.h	aakg-1	25	3
WT	firstrep	37	4	9	5	136.514	132.922	3.592	445.865	Y111B2C.h	aakg-1	25	3
WT	firstrep	37	4	9	6	135.31	134.135	1.175	430.556	Y111B2C.h	aakg-1	25	3
WT	firstrep	37	4	9	7	136.079	134.517	1.561	407.385	Y111B2C.h	aakg-1	25	3
WT	firstrep	37	4	9	8	211.405	159.446	51.958	739.202	Y111B2C.h	aakg-1	25	3
WT	firstrep	37	4	9	9	383.409	142.243	241.166	979.441	Y111B2C.h	aakg-1	25	3
WT	firstrep	37	4	9	10	132.657	131.96	0.698	420.988	Y111B2C.h	aakg-1	25	3
WT	firstrep	37	4	9	11	134.719	133.395	1.324	370.178	Y111B2C.h	aakg-1	25	3
WT	firstrep	37	4	9	12	131.155	129.929	1.227	418.823	Y111B2C.h	aakg-1	25	3
WT	firstrep	37	4	9	13	132.165	130.997	1.168	407.603	Y111B2C.h	aakg-1	25	3
WT	firstrep	37	4	9	14	136.852	136.364	0.488	358.005	Y111B2C.h	aakg-1	25	3
WT	firstrep	37	4	9	15	137.737	136.332	1.405	396.945	Y111B2C.h	aakg-1	25	3
WT	firstrep	37	4	9	16	135.297	135.142	0.154	342.482	Y111B2C.h	aakg-1	25	3
WT	firstrep	37	4	9	17	139.944	136.431	3.513	519.438	Y111B2C.h	aakg-1	25	3
WT	firstrep	37	4	9	18	139.391	137.248	2.144	318.516	Y111B2C.h	aakg-1	25	3
WT	firstrep	37	4	9	19	139.926	138.544	1.382	325.197	Y111B2C.h	aakg-1	25	3
WT	firstrep	37	4	9	20	128.763	126.688	2.075	382.238	Y111B2C.h	aakg-1	25	3
WT	firstrep	37	4	9	21	128.341	127.353	0.987	414.941	Y111B2C.h	aakg-1	25	3
WT	firstrep	37	4	9	22	139.651	138.952	0.699	385.891	Y111B2C.h	aakg-1	25	3
WT	firstrep	37	4	9	23	139.465	137.471	1.994	398.283	Y111B2C.h	aakg-1	25	3
WT	firstrep	37	4	9	24	132.187	130.909	1.279	372.248	Y111B2C.h	aakg-1	25	3
WT	firstrep	37	4	9	25	367.336	141.809	225.527	879.112	Y111B2C.h	aakg-1	25	3
D2	firstrep	37	4	9	1	135.488	129.582	5.906	381.862	Y111B2C.h	aakg-1	19	3
D2	firstrep	37	4	9	2	146.117	132.249	13.868	495.781	Y111B2C.h	aakg-1	19	3
D2	firstrep	37	4	9	3	133.052	130.481	2.571	329.218	Y111B2C.h	aakg-1	19	3
D2	firstrep	37	4	9	4	134.69	129.209	5.481	591.927	Y111B2C.h	aakg-1	19	3
D2	firstrep	37	4	9	5	146.96	133.96	12.999	502.343	Y111B2C.h	aakg-1	19	3
D2	firstrep	37	4	9	6	138.251	132.704	5.547	704.356	Y111B2C.h	aakg-1	19	3
D2	firstrep	37	4	9	7	140.379	132.841	7.537	673.494	Y111B2C.h	aakg-1	19	3
D2	firstrep	37	4	9	8	143.697	135.835	7.862	412.278	Y111B2C.h	aakg-1	19	3
D2	firstrep	37	4	9	9	134.625	131.661	2.964	332.741	Y111B2C.h	aakg-1	19	3
D2	firstrep	37	4	9	10	153.063	136.798	16.265	636.529	Y111B2C.h	aakg-1	19	3
D2	firstrep	37	4	9	11	141.387	134.964	6.424	679.077	Y111B2C.h	aakg-1	19	3
D2	firstrep	37	4	9	12	141.246	137.236	4.009	528.849	Y111B2C.h	aakg-1	19	3
D2	firstrep	37	4	9	13	152.003	132.239	19.765	471.377	Y111B2C.h	aakg-1	19	3
D2	firstrep	37	4	9	14	135.912	133.681	2.231	318.744	Y111B2C.h	aakg-1	19	3
D2	firstrep	37	4	9	15	145.945	135.42	10.525	406.221	Y111B2C.h	aakg-1	19	3
D2	firstrep	37	4	9	16	161.698	142.482	19.216	567.136	Y111B2C.h	aakg-1	19	3
D2	firstrep	37	4	9	17	137.232	131.351	5.881	463.523	Y111B2C.h	aakg-1	19	3
D2	firstrep	37	4	9	18	146.327	134.827	11.5	417.697	Y111B2C.h	aakg-1	19	3
D2	firstrep	37	4	9	19	134.818	132.603	2.215	395.291	Y111B2C.h	aakg-1	19	3
WT	secondrep	37	4	9	1	442.005	138.516	303.489	898.062	Y111B2C.h	aakg-1	16	16
WT	secondrep	37	4	9	2	542.826	159.467	383.359	859.258	Y111B2C.h	aakg-1	16	16
WT	secondrep	37	4	9	3	478.263	143.115	335.148	818.622	Y111B2C.h	aakg-1	16	16
WT	secondrep	37	4	9	4	373.326	154.008	219.319	991.561	Y111B2C.h	aakg-1	16	16
WT	secondrep	37	4	9	5	140.445	134.153	6.292	687.381	Y111B2C.h	aakg-1	16	16
WT	secondrep	37	4	9	6	408.818	182.474	226.344	987.679	Y111B2C.h	aakg-1	16	16
WT	secondrep	37	4	9	7	520.399	145.378	375.021	790.308	Y111B2C.h	aakg-1	16	16
WT	secondrep	37	4	9	8	430.221	145.574	284.647	860.452	Y111B2C.h	aakg-1	16	16
WT	secondrep	37	4	9	9	491.291	142.289	349.002	890.431	Y111B2C.h	aakg-1	16	16
WT	secondrep	37	4	9	10	461.304	145.712	315.591	1005.41	Y111B2C.h	aakg-1	16	16
WT	secondrep	37	4	9	11	604.178	150.802	453.377	918.034	Y111B2C.h	aakg-1	16	16
WT	secondrep	37	4	9	12	456.064	142.063	314.001	968.084	Y111B2C.h	aakg-1	16	16
WT	secondrep	37	4	9	13	319.681	139.516	180.164	977.02	Y111B2C.h	aakg-1	16	16
WT	secondrep	37	4	9	14	650.248	147.068	503.18	938.821	Y111B2C.h	aakg-1	16	16
WT	secondrep	37	4	9	15	440.363	143.79	296.573	920.189	Y111B2C.h	aakg-1	16	16
WT	secondrep	37	4	9	16	398.471	139.413	259.058	898.873	Y111B2C.h	aakg-1	16	16
D2	secondrep	37	4	9	1	170.334	129.659	40.675	1469.42	Y111B2C.h	aakg-1	25	23
D2	secondrep	37	4	9	2	174.644	130.507	44.137	847.686	Y111B2C.h	aakg-1	25	23
D2	secondrep	37	4	9	3	204.862	131.975	72.887	724.215	Y111B2C.h	aakg-1	25	23
D2	secondrep	37	4	9	4	155.245	128.728	26.517	694.879	Y111B2C.h	aakg-1	25	23
D2	secondrep	37	4	9	5	159.003	129.851	29.152	750.952	Y111B2C.h	aakg-1	25	23
D2	secondrep	37	4	9	6	168.094	132.474	35.62	803.91	Y111B2C.h	aakg-1	25	23
D2	secondrep	37	4	9	7	169.516	131.944	37.572	737.026	Y111B2C.h	aakg-1	25	23
D2	secondrep	37	4	9	8	271.883	136.497	135.386	843.071	Y111B2C.h	aakg-1	25	23
D2	secondrep	37	4	9	9	200.515	132.233	68.282	723.154	Y111B2C.h	aakg-1	25	23
D2	secondrep	37	4	9	10	214.73	131.513	83.217	896.794	Y111B2C.h	aakg-1	25	23
D2	secondrep	37	4	9	11	165.02	128.43	36.59	750.1	Y111B2C.h	aakg-1	25	23
D2	secondrep	37	4	9	12	200.418	141.303	59.115	884.68	Y111B2C.h	aakg-1	25	23
D2	secondrep	37	4	9	13	180.027	133.153	46.874	719.03	Y111B2C.h	aakg-1	25	23
D2	secondrep	37	4	9	14	143.993	136.772	7.222	513.315	Y111B2C.h	aakg-1	25	23
D2	secondrep	37	4	9	15	223.659	135.045	88.614	896.054	Y111B2C.h	aakg-1	25	23
D2	secondrep	37	4	9	16	196.27	134.816	61.454	843.126	Y111B2C.h	aakg-1	25	23
D2	secondrep	37	4	9	17	177.54	133.064	44.476	398.898	Y111B2C.h	aakg-1	25	23
D2	secondrep	37	4	9	18	242.996	133.609	109.387	892.273	Y111B2C.h	aakg-1	25	23
D2	secondrep	37	4	9	19	231.395	135.975	95.42	805.714	Y111B2C.h	aakg-1	25	23
D2	secondrep	37	4	9	20	218.556	142.292	76.264	836.35	Y111B2C.h	aakg-1	25	23
D2	secondrep	37	4	9	21	186.388	132.674	53.714	738.816	Y111B2C.h	aakg-1	25	23
D2	secondrep	37	4	9	22	209.739	131.34	78.399	868.737	Y111B2C.h	aakg-1	25	23
D2	secondrep	37	4	9	23	264.691	140.489	124.203	888.284	Y111B2C.h	aakg-1	25	23
D2	secondrep	37	4	9	24	288.95	139.601	149.349	800.984	Y111B2C.h	aakg-1	25	23
D2	secondrep	37	4	9	25	202.241	133.853	68.388	826.632	Y111B2C.h	aakg-1	25	23
D2	firstrep	24	3	4	1	193.395	133.24	60.156	796.868	W02B12.6	aars-1	27	17
D2	firstrep	24	3	4	2	161.237	139.785	21.451	677.305	W02B12.6	aars-1	27	17
D2	firstrep	24	3	4	3	175.676	145.359	30.317	804.168	W02B12.6	aars-1	27	17
D2	firstrep	24	3	4	4	180.01	133.827	46.183	888.244	W02B12.6	aars-1	27	17
D2	firstrep	24	3	4	5	194.97	159.788	35.182	501.383	W02B12.6	aars-1	27	17
D2	firstrep	24	3	4	6	253.199	143.355	109.844	706.687	W02B12.6	aars-1	27	17
D2	firstrep	24	3	4	7	196.488	153.988	42.5	877.853	W02B12.6	aars-1	27	17
D2	firstrep	24	3	4	8	193.014	137.957	55.057	583.812	W02B12.6	aars-1	27	17
D2	firstrep	24	3	4	9	189.917	149.113	40.804	728.269	W02B12.6	aars-1	27	17
D2	firstrep	24	3	4	10	148.455	148.718	-0.263	374.014	W02B12.6	aars-1	27	17
D2	firstrep	24	3	4	11	251.088	158.235	92.853	711.966	W02B12.6	aars-1	27	17
D2	firstrep	24	3	4	12	186.599	139.229	47.37	753.227	W02B12.6	aars-1	27	17
D2	firstrep	24	3	4	13	148.777	150.249	-1.472	331.135	W02B12.6	aars-1	27	17
D2	firstrep	24	3	4	14	225.716	137.177	88.539	623.741	W02B12.6	aars-1	27	17
D2	firstrep	24	3	4	15	185.688	146.857	38.83	648.303	W02B12.6	aars-1	27	17
D2	firstrep	24	3	4	16	196.571	137.574	58.996	699.669	W02B12.6	aars-1	27	17
D2	firstrep	24	3	4	17	174.033	135.632	38.402	693.831	W02B12.6	aars-1	27	17
D2	firstrep	24	3	4	18	148.514	134.005	14.509	472.286	W02B12.6	aars-1	27	17
D2	firstrep	24	3	4	19	151.803	139.523	12.28	666.299	W02B12.6	aars-1	27	17
D2	firstrep	24	3	4	20	198.685	135.703	62.982	834.636	W02B12.6	aars-1	27	17
D2	firstrep	24	3	4	21	183.797	134.386	49.412	705.547	W02B12.6	aars-1	27	17
D2	firstrep	24	3	4	22	191.96	133.166	58.794	523.902	W02B12.6	aars-1	27	17
D2	firstrep	24	3	4	23	146.226	145.808	0.418	439.574	W02B12.6	aars-1	27	17
D2	firstrep	24	3	4	24	156.524	135.218	21.306	545.09	W02B12.6	aars-1	27	17
D2	firstrep	24	3	4	25	210.341	134.056	76.285	750.47	W02B12.6	aars-1	27	17
D2	firstrep	24	3	4	26	190.562	132.764	57.797	1215.83	W02B12.6	aars-1	27	17
D2	firstrep	24	3	4	27	170	131.332	38.668	691.288	W02B12.6	aars-1	27	17
WT	firstrep	24	3	4	1	247.317	121.1	126.217	631.035	W02B12.6	aars-1	26	22
WT	firstrep	24	3	4	2	233.202	123.191	110.011	801.392	W02B12.6	aars-1	26	22
WT	firstrep	24	3	4	3	214.946	122.836	92.11	943.568	W02B12.6	aars-1	26	22
WT	firstrep	24	3	4	4	224.715	125.419	99.296	899.938	W02B12.6	aars-1	26	22
WT	firstrep	24	3	4	5	245.99	126.695	119.295	888.091	W02B12.6	aars-1	26	22
WT	firstrep	24	3	4	6	266.102	127.425	138.676	882.222	W02B12.6	aars-1	26	22
WT	firstrep	24	3	4	7	167.148	126.212	40.936	558.922	W02B12.6	aars-1	26	22
WT	firstrep	24	3	4	8	251.492	126.671	124.821	910.424	W02B12.6	aars-1	26	22
WT	firstrep	24	3	4	9	225.547	123.694	101.853	779.301	W02B12.6	aars-1	26	22
WT	firstrep	24	3	4	10	273.463	128.931	144.532	785.466	W02B12.6	aars-1	26	22
WT	firstrep	24	3	4	11	167.03	126.092	40.938	601.726	W02B12.6	aars-1	26	22
WT	firstrep	24	3	4	12	274.349	127.329	147.02	857.213	W02B12.6	aars-1	26	22
WT	firstrep	24	3	4	13	267.412	128.605	138.807	842.611	W02B12.6	aars-1	26	22
WT	firstrep	24	3	4	14	205.579	130.308	75.272	728.159	W02B12.6	aars-1	26	22
WT	firstrep	24	3	4	15	214.736	123.838	90.898	824.474	W02B12.6	aars-1	26	22
WT	firstrep	24	3	4	16	268.715	131.572	137.142	773.004	W02B12.6	aars-1	26	22
WT	firstrep	24	3	4	17	300.643	129.695	170.948	833.838	W02B12.6	aars-1	26	22
WT	firstrep	24	3	4	18	277.869	124.743	153.126	857.544	W02B12.6	aars-1	26	22
WT	firstrep	24	3	4	19	256.139	126.847	129.291	784.695	W02B12.6	aars-1	26	22
WT	firstrep	24	3	4	20	263.997	125.317	138.68	803.638	W02B12.6	aars-1	26	22
WT	firstrep	24	3	4	21	278.631	126.806	151.825	763.19	W02B12.6	aars-1	26	22
WT	firstrep	24	3	4	22	297.789	126.514	171.275	886.384	W02B12.6	aars-1	26	22
WT	firstrep	24	3	4	23	222.879	121.977	100.902	707.064	W02B12.6	aars-1	26	22
WT	firstrep	24	3	4	24	255.254	126.989	128.265	1178.58	W02B12.6	aars-1	26	22
WT	firstrep	24	3	4	25	187.362	122.807	64.555	734.847	W02B12.6	aars-1	26	22
WT	firstrep	24	3	4	26	325.171	127.615	197.556	514.479	W02B12.6	aars-1	26	22
D2	secondrep	24	3	4	1	215.923	133.461	82.462	1008.27	W02B12.6	aars-1	25	22
D2	secondrep	24	3	4	2	282.928	148.06	134.869	967.052	W02B12.6	aars-1	25	22
D2	secondrep	24	3	4	3	285.328	139.131	146.196	938.374	W02B12.6	aars-1	25	22
D2	secondrep	24	3	4	4	256.252	135.077	121.175	963.433	W02B12.6	aars-1	25	22
D2	secondrep	24	3	4	5	139.497	134.039	5.457	566.216	W02B12.6	aars-1	25	22
D2	secondrep	24	3	4	6	291.399	142.767	148.632	919.837	W02B12.6	aars-1	25	22
D2	secondrep	24	3	4	7	251.281	142.074	109.208	830.615	W02B12.6	aars-1	25	22
D2	secondrep	24	3	4	8	252.447	141.947	110.501	1029.51	W02B12.6	aars-1	25	22
D2	secondrep	24	3	4	9	327.858	141.503	186.355	905.957	W02B12.6	aars-1	25	22
D2	secondrep	24	3	4	10	296.648	143.26	153.389	921.925	W02B12.6	aars-1	25	22
D2	secondrep	24	3	4	11	261.913	132.164	129.749	935.211	W02B12.6	aars-1	25	22
D2	secondrep	24	3	4	12	250.725	136.6	114.125	826.155	W02B12.6	aars-1	25	22
D2	secondrep	24	3	4	13	146.708	138.607	8.1	658.014	W02B12.6	aars-1	25	22
D2	secondrep	24	3	4	14	244.721	142.356	102.365	888.805	W02B12.6	aars-1	25	22
D2	secondrep	24	3	4	15	270.854	141.096	129.758	1000.57	W02B12.6	aars-1	25	22
D2	secondrep	24	3	4	16	256.312	131.992	124.32	922.643	W02B12.6	aars-1	25	22
D2	secondrep	24	3	4	17	257.094	131.985	125.109	626.7	W02B12.6	aars-1	25	22
D2	secondrep	24	3	4	18	282.826	139.535	143.291	984.952	W02B12.6	aars-1	25	22
D2	secondrep	24	3	4	19	274.059	136.386	137.673	848.238	W02B12.6	aars-1	25	22
D2	secondrep	24	3	4	20	266.641	139.466	127.175	937.662	W02B12.6	aars-1	25	22
D2	secondrep	24	3	4	21	225.105	133.342	91.762	984.137	W02B12.6	aars-1	25	22
D2	secondrep	24	3	4	22	264.362	137.922	126.439	892.661	W02B12.6	aars-1	25	22
D2	secondrep	24	3	4	23	249.716	132.175	117.541	903.745	W02B12.6	aars-1	25	22
D2	secondrep	24	3	4	24	286.034	134.73	151.305	805.811	W02B12.6	aars-1	25	22
D2	secondrep	24	3	4	25	263.038	132.847	130.191	938.437	W02B12.6	aars-1	25	22
WT	secondrep	24	3	4	1	357.601	141.54	216.061	937.996	W02B12.6	aars-1	28	24
WT	secondrep	24	3	4	2	377.469	147.012	230.458	662.44	W02B12.6	aars-1	28	24
WT	secondrep	24	3	4	3	349.168	141.438	207.731	942.659	W02B12.6	aars-1	28	24
WT	secondrep	24	3	4	4	133.338	131.598	1.74	544.935	W02B12.6	aars-1	28	24
WT	secondrep	24	3	4	5	371.943	137.198	234.745	923.869	W02B12.6	aars-1	28	24
WT	secondrep	24	3	4	6	416.626	145.418	271.209	940.265	W02B12.6	aars-1	28	24
WT	secondrep	24	3	4	7	372.278	137.964	234.313	1012.43	W02B12.6	aars-1	28	24
WT	secondrep	24	3	4	8	384.864	146.141	238.723	927.098	W02B12.6	aars-1	28	24
WT	secondrep	24	3	4	9	409.014	146.375	262.639	921.957	W02B12.6	aars-1	28	24
WT	secondrep	24	3	4	10	139.509	138.567	0.942	555.309	W02B12.6	aars-1	28	24
WT	secondrep	24	3	4	11	329.389	136.41	192.979	1018.55	W02B12.6	aars-1	28	24
WT	secondrep	24	3	4	12	139.37	139.537	-0.167	342.692	W02B12.6	aars-1	28	24
WT	secondrep	24	3	4	13	386.168	141.452	244.716	871.541	W02B12.6	aars-1	28	24
WT	secondrep	24	3	4	14	464.119	147.78	316.339	968.916	W02B12.6	aars-1	28	24
WT	secondrep	24	3	4	15	470.806	160.984	309.822	947.307	W02B12.6	aars-1	28	24
WT	secondrep	24	3	4	16	469.405	157.11	312.295	893.861	W02B12.6	aars-1	28	24
WT	secondrep	24	3	4	17	399.25	148.625	250.625	890.692	W02B12.6	aars-1	28	24
WT	secondrep	24	3	4	18	423.751	149.239	274.512	923.974	W02B12.6	aars-1	28	24
WT	secondrep	24	3	4	19	401.581	149.007	252.574	897.629	W02B12.6	aars-1	28	24
WT	secondrep	24	3	4	20	372.193	146.438	225.756	980.243	W02B12.6	aars-1	28	24
WT	secondrep	24	3	4	21	415.158	147.102	268.057	932.413	W02B12.6	aars-1	28	24
WT	secondrep	24	3	4	22	366.648	140.77	225.878	914.893	W02B12.6	aars-1	28	24
WT	secondrep	24	3	4	23	349.432	145.251	204.181	960.174	W02B12.6	aars-1	28	24
WT	secondrep	24	3	4	24	374.483	140.99	233.494	957.422	W02B12.6	aars-1	28	24
WT	secondrep	24	3	4	25	131.064	129.85	1.213	410.986	W02B12.6	aars-1	28	24
WT	secondrep	24	3	4	26	358.627	136.422	222.205	922.687	W02B12.6	aars-1	28	24
WT	secondrep	24	3	4	27	397.256	135.598	261.659	859.631	W02B12.6	aars-1	28	24
WT	secondrep	24	3	4	28	420.521	165.342	255.178	955.685	W02B12.6	aars-1	28	24
D2	secondrep	2	3	8	1	120.408	119.307	1.1	453.249	F28H1.3	aars-2	25	1
D2	secondrep	2	3	8	2	120.679	119.421	1.258	564.453	F28H1.3	aars-2	25	1
D2	secondrep	2	3	8	3	122.876	121.482	1.394	563.573	F28H1.3	aars-2	25	1
D2	secondrep	2	3	8	4	120.299	119.714	0.585	627.371	F28H1.3	aars-2	25	1
D2	secondrep	2	3	8	5	124.271	124.432	-0.162	555.799	F28H1.3	aars-2	25	1
D2	secondrep	2	3	8	6	124.577	122.661	1.915	396.744	F28H1.3	aars-2	25	1
D2	secondrep	2	3	8	7	121.573	120.494	1.079	489.427	F28H1.3	aars-2	25	1
D2	secondrep	2	3	8	8	128.159	128.241	-0.083	582.552	F28H1.3	aars-2	25	1
D2	secondrep	2	3	8	9	122.766	121.805	0.961	606.878	F28H1.3	aars-2	25	1
D2	secondrep	2	3	8	10	129.311	129.236	0.074	525.452	F28H1.3	aars-2	25	1
D2	secondrep	2	3	8	11	123.964	124.447	-0.483	562.36	F28H1.3	aars-2	25	1
D2	secondrep	2	3	8	12	129.627	128.902	0.725	600.939	F28H1.3	aars-2	25	1
D2	secondrep	2	3	8	13	126.878	125.176	1.702	559.22	F28H1.3	aars-2	25	1
D2	secondrep	2	3	8	14	127.652	127.662	-0.01	516.352	F28H1.3	aars-2	25	1
D2	secondrep	2	3	8	15	130.168	130.351	-0.183	545.489	F28H1.3	aars-2	25	1
D2	secondrep	2	3	8	16	123.567	123.125	0.442	536.112	F28H1.3	aars-2	25	1
D2	secondrep	2	3	8	17	127.097	126.167	0.93	507.86	F28H1.3	aars-2	25	1
D2	secondrep	2	3	8	18	122.783	121.523	1.26	586.634	F28H1.3	aars-2	25	1
D2	secondrep	2	3	8	19	130.038	128.649	1.39	496.096	F28H1.3	aars-2	25	1
D2	secondrep	2	3	8	20	125.531	124.481	1.05	600.009	F28H1.3	aars-2	25	1
D2	secondrep	2	3	8	21	128.693	126.962	1.731	562.654	F28H1.3	aars-2	25	1
D2	secondrep	2	3	8	22	123.132	121.819	1.313	698.4	F28H1.3	aars-2	25	1
D2	secondrep	2	3	8	23	123.666	122.852	0.814	525.41	F28H1.3	aars-2	25	1
D2	secondrep	2	3	8	24	126.974	124.999	1.974	541.809	F28H1.3	aars-2	25	1
D2	secondrep	2	3	8	25	123.598	120.819	2.779	638.461	F28H1.3	aars-2	25	1
D2	firstrep	2	3	8	1	128.749	128.378	0.371	409.444	F28H1.3	aars-2	47	4
D2	firstrep	2	3	8	2	129.345	129.034	0.311	342.443	F28H1.3	aars-2	47	4
D2	firstrep	2	3	8	3	137.771	129.558	8.213	556.029	F28H1.3	aars-2	47	4
D2	firstrep	2	3	8	4	135.723	128.571	7.152	608.724	F28H1.3	aars-2	47	4
D2	firstrep	2	3	8	5	131.648	131.477	0.171	463.964	F28H1.3	aars-2	47	4
D2	firstrep	2	3	8	6	134.958	129.715	5.244	534.582	F28H1.3	aars-2	47	4
D2	firstrep	2	3	8	7	129.331	128.772	0.559	511.557	F28H1.3	aars-2	47	4
D2	firstrep	2	3	8	8	136.835	134.162	2.673	600.122	F28H1.3	aars-2	47	4
D2	firstrep	2	3	8	9	132.761	132.808	-0.047	448.961	F28H1.3	aars-2	47	4
D2	firstrep	2	3	8	10	134.493	134.371	0.121	606.559	F28H1.3	aars-2	47	4
D2	firstrep	2	3	8	11	133.715	129.941	3.774	624.392	F28H1.3	aars-2	47	4
D2	firstrep	2	3	8	12	141.163	132.454	8.708	665.531	F28H1.3	aars-2	47	4
D2	firstrep	2	3	8	13	138.269	132.009	6.26	401.836	F28H1.3	aars-2	47	4
D2	firstrep	2	3	8	14	133.238	133.213	0.025	371.844	F28H1.3	aars-2	47	4
D2	firstrep	2	3	8	15	140.554	137.226	3.328	664.708	F28H1.3	aars-2	47	4
D2	firstrep	2	3	8	16	144.894	137.126	7.767	512.711	F28H1.3	aars-2	47	4
D2	firstrep	2	3	8	17	134.272	131.07	3.202	517.106	F28H1.3	aars-2	47	4
D2	firstrep	2	3	8	18	144.547	137.901	6.646	419.292	F28H1.3	aars-2	47	4
D2	firstrep	2	3	8	19	129.667	129.606	0.06	350.12	F28H1.3	aars-2	47	4
D2	firstrep	2	3	8	20	143.897	138.779	5.118	467.282	F28H1.3	aars-2	47	4
D2	firstrep	2	3	8	21	139.2	133.43	5.769	507.624	F28H1.3	aars-2	47	4
D2	firstrep	2	3	8	22	139.298	139.896	-0.598	474.692	F28H1.3	aars-2	47	4
D2	firstrep	2	3	8	23	135.253	135.458	-0.205	366.527	F28H1.3	aars-2	47	4
D2	firstrep	2	3	8	24	147.512	141.791	5.722	527.65	F28H1.3	aars-2	47	4
D2	firstrep	2	3	8	25	139.388	139.905	-0.517	454.582	F28H1.3	aars-2	47	4
D2	firstrep	2	3	8	26	148.572	143.651	4.921	547.293	F28H1.3	aars-2	47	4
D2	firstrep	2	3	8	27	139.655	130.926	8.729	496.186	F28H1.3	aars-2	47	4
D2	firstrep	2	3	8	28	133.45	131.703	1.747	516.297	F28H1.3	aars-2	47	4
D2	firstrep	2	3	8	29	140.178	133.624	6.555	631.903	F28H1.3	aars-2	47	4
D2	firstrep	2	3	8	30	132.011	130.721	1.29	549.485	F28H1.3	aars-2	47	4
D2	firstrep	2	3	8	31	144.871	142.323	2.548	607.661	F28H1.3	aars-2	47	4
D2	firstrep	2	3	8	32	137.017	130.819	6.199	506.333	F28H1.3	aars-2	47	4
D2	firstrep	2	3	8	33	146.478	137.003	9.476	510.426	F28H1.3	aars-2	47	4
D2	firstrep	2	3	8	34	138.021	138.025	-0.004	565.543	F28H1.3	aars-2	47	4
D2	firstrep	2	3	8	35	137.27	137.249	0.02	534.57	F28H1.3	aars-2	47	4
D2	firstrep	2	3	8	36	138.923	133.238	5.685	455.382	F28H1.3	aars-2	47	4
D2	firstrep	2	3	8	37	139.872	135.084	4.788	543.865	F28H1.3	aars-2	47	4
D2	firstrep	2	3	8	38	139.437	139.526	-0.088	406.333	F28H1.3	aars-2	47	4
D2	firstrep	2	3	8	39	140.901	137.96	2.941	693.581	F28H1.3	aars-2	47	4
D2	firstrep	2	3	8	40	136.074	132.755	3.32	567.452	F28H1.3	aars-2	47	4
D2	firstrep	2	3	8	41	145.276	137.809	7.467	560.003	F28H1.3	aars-2	47	4
D2	firstrep	2	3	8	42	145.419	137.021	8.398	554.209	F28H1.3	aars-2	47	4
D2	firstrep	2	3	8	43	134.516	133.961	0.555	357.278	F28H1.3	aars-2	47	4
D2	firstrep	2	3	8	44	140.864	134.593	6.27	549.195	F28H1.3	aars-2	47	4
D2	firstrep	2	3	8	45	132.76	131.72	1.04	379.874	F28H1.3	aars-2	47	4
D2	firstrep	2	3	8	46	138.888	133.018	5.87	678.851	F28H1.3	aars-2	47	4
D2	firstrep	2	3	8	47	137.133	131.099	6.034	467.745	F28H1.3	aars-2	47	4
WT	firstrep	2	3	8	1	131.382	130.927	0.455	414.325	F28H1.3	aars-2	52	6
WT	firstrep	2	3	8	2	139.042	133.389	5.653	565.875	F28H1.3	aars-2	52	6
WT	firstrep	2	3	8	3	141.072	134.55	6.522	493.691	F28H1.3	aars-2	52	6
WT	firstrep	2	3	8	4	141.009	136.191	4.819	711.7	F28H1.3	aars-2	52	6
WT	firstrep	2	3	8	5	131.091	130.374	0.716	342.66	F28H1.3	aars-2	52	6
WT	firstrep	2	3	8	6	136.101	129.671	6.429	598.485	F28H1.3	aars-2	52	6
WT	firstrep	2	3	8	7	135.052	135.036	0.016	393.958	F28H1.3	aars-2	52	6
WT	firstrep	2	3	8	8	141.899	129.525	12.374	533.423	F28H1.3	aars-2	52	6
WT	firstrep	2	3	8	9	141.255	137.342	3.913	988.237	F28H1.3	aars-2	52	6
WT	firstrep	2	3	8	10	144.142	132.028	12.114	523.51	F28H1.3	aars-2	52	6
WT	firstrep	2	3	8	11	137.913	131.07	6.842	527.055	F28H1.3	aars-2	52	6
WT	firstrep	2	3	8	12	149.357	139.239	10.118	1008.95	F28H1.3	aars-2	52	6
WT	firstrep	2	3	8	13	145.786	140.927	4.858	609.688	F28H1.3	aars-2	52	6
WT	firstrep	2	3	8	14	152.529	138.388	14.141	505.239	F28H1.3	aars-2	52	6
WT	firstrep	2	3	8	15	145.597	134.506	11.091	586.765	F28H1.3	aars-2	52	6
WT	firstrep	2	3	8	16	141.879	131.519	10.36	520.337	F28H1.3	aars-2	52	6
WT	firstrep	2	3	8	17	152.871	151.68	1.191	538	F28H1.3	aars-2	52	6
WT	firstrep	2	3	8	18	141.074	136.27	4.804	530.535	F28H1.3	aars-2	52	6
WT	firstrep	2	3	8	19	144.797	140.403	4.395	554.743	F28H1.3	aars-2	52	6
WT	firstrep	2	3	8	20	152.606	137.313	15.293	449.091	F28H1.3	aars-2	52	6
WT	firstrep	2	3	8	21	139.207	133.115	6.092	463.508	F28H1.3	aars-2	52	6
WT	firstrep	2	3	8	22	147.568	143.682	3.887	438.717	F28H1.3	aars-2	52	6
WT	firstrep	2	3	8	23	150.23	142.386	7.844	547.165	F28H1.3	aars-2	52	6
WT	firstrep	2	3	8	24	150.938	130.247	20.692	438.507	F28H1.3	aars-2	52	6
WT	firstrep	2	3	8	25	165.46	140.529	24.931	520.102	F28H1.3	aars-2	52	6
WT	firstrep	2	3	8	26	142.726	137.058	5.668	1092.73	F28H1.3	aars-2	52	6
WT	firstrep	2	3	8	27	175.54	143.915	31.624	509.664	F28H1.3	aars-2	52	6
WT	firstrep	2	3	8	28	148.076	145.645	2.431	503.752	F28H1.3	aars-2	52	6
WT	firstrep	2	3	8	29	152.386	140.127	12.259	519.958	F28H1.3	aars-2	52	6
WT	firstrep	2	3	8	30	139.571	136.659	2.913	521.574	F28H1.3	aars-2	52	6
WT	firstrep	2	3	8	31	164.177	142.723	21.453	571.593	F28H1.3	aars-2	52	6
WT	firstrep	2	3	8	32	133.471	132.7	0.772	489.162	F28H1.3	aars-2	52	6
WT	firstrep	2	3	8	33	149.08	142.077	7.003	500.28	F28H1.3	aars-2	52	6
WT	firstrep	2	3	8	34	144.209	140.583	3.626	552.12	F28H1.3	aars-2	52	6
WT	firstrep	2	3	8	35	138.859	134.221	4.637	523.842	F28H1.3	aars-2	52	6
WT	firstrep	2	3	8	36	147.103	137.712	9.391	415.915	F28H1.3	aars-2	52	6
WT	firstrep	2	3	8	37	134.154	134.365	-0.211	310.706	F28H1.3	aars-2	52	6
WT	firstrep	2	3	8	38	146.904	139.251	7.653	579.217	F28H1.3	aars-2	52	6
WT	firstrep	2	3	8	39	136.573	135.12	1.453	535.104	F28H1.3	aars-2	52	6
WT	firstrep	2	3	8	40	140.045	131.858	8.187	546.416	F28H1.3	aars-2	52	6
WT	firstrep	2	3	8	41	136.793	133.344	3.448	685.415	F28H1.3	aars-2	52	6
WT	firstrep	2	3	8	42	148.732	138.675	10.057	519.075	F28H1.3	aars-2	52	6
WT	firstrep	2	3	8	43	149.807	141.545	8.262	551.406	F28H1.3	aars-2	52	6
WT	firstrep	2	3	8	44	153.503	136.728	16.775	491.922	F28H1.3	aars-2	52	6
WT	firstrep	2	3	8	45	142.261	138.259	4.002	662.203	F28H1.3	aars-2	52	6
WT	firstrep	2	3	8	46	144.202	143.596	0.606	591.059	F28H1.3	aars-2	52	6
WT	firstrep	2	3	8	47	138.408	138.651	-0.243	406.949	F28H1.3	aars-2	52	6
WT	firstrep	2	3	8	48	150.404	132.568	17.836	494.457	F28H1.3	aars-2	52	6
WT	firstrep	2	3	8	49	154.56	133.954	20.606	571.584	F28H1.3	aars-2	52	6
WT	firstrep	2	3	8	50	140.177	133.749	6.428	550.444	F28H1.3	aars-2	52	6
WT	firstrep	2	3	8	51	144.52	134.742	9.778	606.612	F28H1.3	aars-2	52	6
WT	firstrep	2	3	8	52	135.233	133.096	2.138	436.758	F28H1.3	aars-2	52	6
WT	secondrep	2	3	8	1	148.776	132.359	16.417	833.834	F28H1.3	aars-2	42	35
WT	secondrep	2	3	8	2	160.656	128.569	32.086	700.895	F28H1.3	aars-2	42	35
WT	secondrep	2	3	8	3	150.428	131.967	18.461	817.237	F28H1.3	aars-2	42	35
WT	secondrep	2	3	8	4	159.279	136.679	22.599	751.636	F28H1.3	aars-2	42	35
WT	secondrep	2	3	8	5	181.992	135.578	46.414	686.355	F28H1.3	aars-2	42	35
WT	secondrep	2	3	8	6	159.947	130.313	29.634	466.815	F28H1.3	aars-2	42	35
WT	secondrep	2	3	8	7	147.51	142.526	4.984	788.493	F28H1.3	aars-2	42	35
WT	secondrep	2	3	8	8	164.079	136.412	27.667	705.013	F28H1.3	aars-2	42	35
WT	secondrep	2	3	8	9	160.807	135.384	25.423	717.572	F28H1.3	aars-2	42	35
WT	secondrep	2	3	8	10	171.717	136.463	35.255	821.955	F28H1.3	aars-2	42	35
WT	secondrep	2	3	8	11	170.949	130.533	40.415	803.773	F28H1.3	aars-2	42	35
WT	secondrep	2	3	8	12	142.849	141.632	1.217	726.949	F28H1.3	aars-2	42	35
WT	secondrep	2	3	8	13	134.316	132.115	2.201	484.036	F28H1.3	aars-2	42	35
WT	secondrep	2	3	8	14	201.874	141.009	60.865	702.585	F28H1.3	aars-2	42	35
WT	secondrep	2	3	8	15	166.937	129.628	37.309	777.616	F28H1.3	aars-2	42	35
WT	secondrep	2	3	8	16	150.677	148.247	2.429	790.305	F28H1.3	aars-2	42	35
WT	secondrep	2	3	8	17	145.031	144.7	0.331	716.344	F28H1.3	aars-2	42	35
WT	secondrep	2	3	8	18	152.942	130.369	22.573	723.622	F28H1.3	aars-2	42	35
WT	secondrep	2	3	8	19	159.338	140.702	18.636	680.615	F28H1.3	aars-2	42	35
WT	secondrep	2	3	8	20	140.234	141.959	-1.725	352.409	F28H1.3	aars-2	42	35
WT	secondrep	2	3	8	21	157.002	145.083	11.919	856.251	F28H1.3	aars-2	42	35
WT	secondrep	2	3	8	22	166.7	140.433	26.267	793.122	F28H1.3	aars-2	42	35
WT	secondrep	2	3	8	23	130.617	131.137	-0.52	459.911	F28H1.3	aars-2	42	35
WT	secondrep	2	3	8	24	157.723	140.024	17.699	804.733	F28H1.3	aars-2	42	35
WT	secondrep	2	3	8	25	165.609	134.762	30.847	749.625	F28H1.3	aars-2	42	35
WT	secondrep	2	3	8	26	190.243	140.401	49.842	719.373	F28H1.3	aars-2	42	35
WT	secondrep	2	3	8	27	162.543	130.491	32.052	682.55	F28H1.3	aars-2	42	35
WT	secondrep	2	3	8	28	147.685	140.234	7.451	746.77	F28H1.3	aars-2	42	35
WT	secondrep	2	3	8	29	177.239	137.178	40.06	633.974	F28H1.3	aars-2	42	35
WT	secondrep	2	3	8	30	137.983	135.504	2.479	560.301	F28H1.3	aars-2	42	35
WT	secondrep	2	3	8	31	193.9	139.329	54.57	666.27	F28H1.3	aars-2	42	35
WT	secondrep	2	3	8	32	154.669	147.887	6.782	676.034	F28H1.3	aars-2	42	35
WT	secondrep	2	3	8	33	183.124	142.039	41.086	1463.98	F28H1.3	aars-2	42	35
WT	secondrep	2	3	8	34	144.299	132.821	11.478	722.615	F28H1.3	aars-2	42	35
WT	secondrep	2	3	8	35	134.059	133.66	0.398	485.047	F28H1.3	aars-2	42	35
WT	secondrep	2	3	8	36	162.494	130.885	31.608	737.015	F28H1.3	aars-2	42	35
WT	secondrep	2	3	8	37	162.018	134.954	27.065	821.101	F28H1.3	aars-2	42	35
WT	secondrep	2	3	8	38	211.181	157.682	53.498	855.005	F28H1.3	aars-2	42	35
WT	secondrep	2	3	8	39	173.79	136.146	37.644	708.493	F28H1.3	aars-2	42	35
WT	secondrep	2	3	8	40	150.491	133.058	17.433	871.908	F28H1.3	aars-2	42	35
WT	secondrep	2	3	8	41	148.349	133.107	15.242	736.264	F28H1.3	aars-2	42	35
WT	secondrep	2	3	8	42	175.409	131.244	44.165	1121.61	F28H1.3	aars-2	42	35
D2	secondrep	44	5	9	1	220.773	133.615	87.159	794.98	F27C8.1	aat-1	16	14
D2	secondrep	44	5	9	2	173.002	130.281	42.721	772.948	F27C8.1	aat-1	16	14
D2	secondrep	44	5	9	3	204.688	136.412	68.276	729.506	F27C8.1	aat-1	16	14
D2	secondrep	44	5	9	4	187.925	136.732	51.193	758.775	F27C8.1	aat-1	16	14
D2	secondrep	44	5	9	5	230.328	131.847	98.481	887.211	F27C8.1	aat-1	16	14
D2	secondrep	44	5	9	6	158.063	141.054	17.009	587.588	F27C8.1	aat-1	16	14
D2	secondrep	44	5	9	7	305.552	148.015	157.537	852.279	F27C8.1	aat-1	16	14
D2	secondrep	44	5	9	8	232.474	139.518	92.956	793.248	F27C8.1	aat-1	16	14
D2	secondrep	44	5	9	9	256.359	142.509	113.85	757.658	F27C8.1	aat-1	16	14
D2	secondrep	44	5	9	10	197.816	133.825	63.99	714.705	F27C8.1	aat-1	16	14
D2	secondrep	44	5	9	11	289.079	145.353	143.726	868.948	F27C8.1	aat-1	16	14
D2	secondrep	44	5	9	12	260.454	141.119	119.335	824.335	F27C8.1	aat-1	16	14
D2	secondrep	44	5	9	13	191.532	133.139	58.393	802.197	F27C8.1	aat-1	16	14
D2	secondrep	44	5	9	14	241.266	135.386	105.88	765.294	F27C8.1	aat-1	16	14
D2	secondrep	44	5	9	15	161.176	134.768	26.408	530.065	F27C8.1	aat-1	16	14
D2	secondrep	44	5	9	16	236.481	134.113	102.368	839.856	F27C8.1	aat-1	16	14
WT	secondrep	44	5	9	1	343.326	138.154	205.171	914.35	F27C8.1	aat-1	19	19
WT	secondrep	44	5	9	2	371.406	141.105	230.302	937.784	F27C8.1	aat-1	19	19
WT	secondrep	44	5	9	3	329.486	138.155	191.33	934.966	F27C8.1	aat-1	19	19
WT	secondrep	44	5	9	4	396.381	142.863	253.518	991.494	F27C8.1	aat-1	19	19
WT	secondrep	44	5	9	5	316.205	133.114	183.091	858.392	F27C8.1	aat-1	19	19
WT	secondrep	44	5	9	6	356.362	133.445	222.917	830.027	F27C8.1	aat-1	19	19
WT	secondrep	44	5	9	7	368.608	140.484	228.123	917.826	F27C8.1	aat-1	19	19
WT	secondrep	44	5	9	8	358.516	135.477	223.039	900.215	F27C8.1	aat-1	19	19
WT	secondrep	44	5	9	9	489.228	139.349	349.879	892.764	F27C8.1	aat-1	19	19
WT	secondrep	44	5	9	10	399.85	137.685	262.165	750.161	F27C8.1	aat-1	19	19
WT	secondrep	44	5	9	11	376.856	146.862	229.994	718.512	F27C8.1	aat-1	19	19
WT	secondrep	44	5	9	12	340.831	135.471	205.36	918.221	F27C8.1	aat-1	19	19
WT	secondrep	44	5	9	13	479.406	148.441	330.965	879.113	F27C8.1	aat-1	19	19
WT	secondrep	44	5	9	14	288.759	134.911	153.848	691.973	F27C8.1	aat-1	19	19
WT	secondrep	44	5	9	15	384.291	143.053	241.238	958.664	F27C8.1	aat-1	19	19
WT	secondrep	44	5	9	16	343.176	136.383	206.793	940.535	F27C8.1	aat-1	19	19
WT	secondrep	44	5	9	17	423.564	141.874	281.69	879.704	F27C8.1	aat-1	19	19
WT	secondrep	44	5	9	18	323.935	135.341	188.594	769.472	F27C8.1	aat-1	19	19
WT	secondrep	44	5	9	19	348.019	137.808	210.212	978.584	F27C8.1	aat-1	19	19
D2	firstrep	44	5	9	1	134.831	129.696	5.134	528.679	F27C8.1	aat-1	35	22
D2	firstrep	44	5	9	2	157.844	131.478	26.366	726.205	F27C8.1	aat-1	35	22
D2	firstrep	44	5	9	3	168.309	133.87	34.439	836.159	F27C8.1	aat-1	35	22
D2	firstrep	44	5	9	4	214.235	132.812	81.424	982.37	F27C8.1	aat-1	35	22
D2	firstrep	44	5	9	5	147.793	131.618	16.175	560.901	F27C8.1	aat-1	35	22
D2	firstrep	44	5	9	6	182.42	131.15	51.269	864.013	F27C8.1	aat-1	35	22
D2	firstrep	44	5	9	7	182.91	133.341	49.568	831.494	F27C8.1	aat-1	35	22
D2	firstrep	44	5	9	8	184.719	133.056	51.663	978.551	F27C8.1	aat-1	35	22
D2	firstrep	44	5	9	9	174.969	140.177	34.792	636.636	F27C8.1	aat-1	35	22
D2	firstrep	44	5	9	10	143.312	140.722	2.59	592.445	F27C8.1	aat-1	35	22
D2	firstrep	44	5	9	11	133.597	131.086	2.511	615.023	F27C8.1	aat-1	35	22
D2	firstrep	44	5	9	12	185.772	137.699	48.073	829.588	F27C8.1	aat-1	35	22
D2	firstrep	44	5	9	13	177.344	138.258	39.085	707.776	F27C8.1	aat-1	35	22
D2	firstrep	44	5	9	14	276.13	143.92	132.21	864.755	F27C8.1	aat-1	35	22
D2	firstrep	44	5	9	15	142.346	138.974	3.372	692.668	F27C8.1	aat-1	35	22
D2	firstrep	44	5	9	16	133.552	131.618	1.933	624.453	F27C8.1	aat-1	35	22
D2	firstrep	44	5	9	17	229.239	141.77	87.469	833.166	F27C8.1	aat-1	35	22
D2	firstrep	44	5	9	18	301.01	149.673	151.337	866.705	F27C8.1	aat-1	35	22
D2	firstrep	44	5	9	19	132.204	129.87	2.334	511.686	F27C8.1	aat-1	35	22
D2	firstrep	44	5	9	20	265.125	143.367	121.758	844.265	F27C8.1	aat-1	35	22
D2	firstrep	44	5	9	21	196.254	137.923	58.332	1425.91	F27C8.1	aat-1	35	22
D2	firstrep	44	5	9	22	186.514	134.167	52.347	811.194	F27C8.1	aat-1	35	22
D2	firstrep	44	5	9	23	322.896	148.933	173.963	896.872	F27C8.1	aat-1	35	22
D2	firstrep	44	5	9	24	150.346	145.312	5.035	523.561	F27C8.1	aat-1	35	22
D2	firstrep	44	5	9	25	136.288	130.183	6.105	511.3	F27C8.1	aat-1	35	22
D2	firstrep	44	5	9	26	208.297	143.182	65.115	800.644	F27C8.1	aat-1	35	22
D2	firstrep	44	5	9	27	146.484	140.853	5.631	615.625	F27C8.1	aat-1	35	22
D2	firstrep	44	5	9	28	197.668	142.925	54.744	1179.72	F27C8.1	aat-1	35	22
D2	firstrep	44	5	9	29	141.377	138.008	3.369	502.541	F27C8.1	aat-1	35	22
D2	firstrep	44	5	9	30	243.756	144.085	99.671	980.17	F27C8.1	aat-1	35	22
D2	firstrep	44	5	9	31	205.168	134.916	70.251	725.247	F27C8.1	aat-1	35	22
D2	firstrep	44	5	9	32	187.897	138.571	49.326	804.185	F27C8.1	aat-1	35	22
D2	firstrep	44	5	9	33	138.904	135.457	3.447	590.575	F27C8.1	aat-1	35	22
D2	firstrep	44	5	9	34	190.996	136.031	54.964	915.405	F27C8.1	aat-1	35	22
D2	firstrep	44	5	9	35	135.876	132.605	3.271	625.711	F27C8.1	aat-1	35	22
WT	firstrep	44	5	9	1	320.919	139.749	181.17	927.875	F27C8.1	aat-1	29	28
WT	firstrep	44	5	9	2	274.107	139.262	134.845	812.091	F27C8.1	aat-1	29	28
WT	firstrep	44	5	9	3	390.895	142.717	248.178	776.39	F27C8.1	aat-1	29	28
WT	firstrep	44	5	9	4	272.571	134.024	138.547	713.117	F27C8.1	aat-1	29	28
WT	firstrep	44	5	9	5	449.867	146.269	303.599	915.331	F27C8.1	aat-1	29	28
WT	firstrep	44	5	9	6	360.73	148.744	211.986	618.299	F27C8.1	aat-1	29	28
WT	firstrep	44	5	9	7	415.972	148.504	267.469	959.756	F27C8.1	aat-1	29	28
WT	firstrep	44	5	9	8	353.232	140.352	212.88	863.969	F27C8.1	aat-1	29	28
WT	firstrep	44	5	9	9	316.253	145.401	170.852	812.007	F27C8.1	aat-1	29	28
WT	firstrep	44	5	9	10	396.593	150.264	246.33	851.944	F27C8.1	aat-1	29	28
WT	firstrep	44	5	9	11	425.687	150.288	275.399	938.139	F27C8.1	aat-1	29	28
WT	firstrep	44	5	9	12	302.341	150.789	151.552	767.697	F27C8.1	aat-1	29	28
WT	firstrep	44	5	9	13	326.602	138.522	188.08	884.763	F27C8.1	aat-1	29	28
WT	firstrep	44	5	9	14	364.966	147.381	217.585	923.468	F27C8.1	aat-1	29	28
WT	firstrep	44	5	9	15	326.279	138.787	187.492	793.495	F27C8.1	aat-1	29	28
WT	firstrep	44	5	9	16	395.31	147.571	247.739	819.449	F27C8.1	aat-1	29	28
WT	firstrep	44	5	9	17	322.185	141.222	180.963	857.739	F27C8.1	aat-1	29	28
WT	firstrep	44	5	9	18	323.775	139.099	184.677	866.671	F27C8.1	aat-1	29	28
WT	firstrep	44	5	9	19	323.135	142.3	180.835	795.56	F27C8.1	aat-1	29	28
WT	firstrep	44	5	9	20	434.43	141.211	293.219	732.137	F27C8.1	aat-1	29	28
WT	firstrep	44	5	9	21	320.858	136.512	184.346	908.425	F27C8.1	aat-1	29	28
WT	firstrep	44	5	9	22	480.34	146.797	333.544	840.966	F27C8.1	aat-1	29	28
WT	firstrep	44	5	9	23	385.295	139.887	245.408	920.758	F27C8.1	aat-1	29	28
WT	firstrep	44	5	9	24	401.129	145.738	255.391	679.473	F27C8.1	aat-1	29	28
WT	firstrep	44	5	9	25	413.229	144.964	268.265	879.145	F27C8.1	aat-1	29	28
WT	firstrep	44	5	9	26	297.722	140.368	157.353	840.448	F27C8.1	aat-1	29	28
WT	firstrep	44	5	9	27	341.623	140.556	201.066	894.442	F27C8.1	aat-1	29	28
WT	firstrep	44	5	9	28	439.737	142.913	296.824	863.025	F27C8.1	aat-1	29	28
WT	firstrep	44	5	9	29	330.77	169.221	161.549	925.815	F27C8.1	aat-1	29	28
WT	secondrep	55	6	9	1	118.795	118.649	0.146	414.331	F07C3.7	aat-2	2	0
WT	secondrep	55	6	9	2	174.312	120.119	54.193	631.102	F07C3.7	aat-2	2	0
D2	secondrep	55	6	9	1	181.252	120.078	61.174	832.235	F07C3.7	aat-2	4	4
D2	secondrep	55	6	9	2	245.321	123.12	122.201	1025.26	F07C3.7	aat-2	4	4
D2	secondrep	55	6	9	3	236.203	128.855	107.348	944.508	F07C3.7	aat-2	4	4
D2	secondrep	55	6	9	4	195.061	122.584	72.477	883.871	F07C3.7	aat-2	4	4
D2	firstrep	55	6	9	1	245.738	153.94	91.799	1049.51	F07C3.7	aat-2	27	25
D2	firstrep	55	6	9	2	143.808	136.785	7.024	572.179	F07C3.7	aat-2	27	25
D2	firstrep	55	6	9	3	253.242	146.297	106.945	895.04	F07C3.7	aat-2	27	25
D2	firstrep	55	6	9	4	264.816	169.545	95.271	974.287	F07C3.7	aat-2	27	25
D2	firstrep	55	6	9	5	218.385	138.543	79.842	1107.6	F07C3.7	aat-2	27	25
D2	firstrep	55	6	9	6	266.75	165.767	100.983	1054.78	F07C3.7	aat-2	27	25
D2	firstrep	55	6	9	7	229.673	135.543	94.13	1028.47	F07C3.7	aat-2	27	25
D2	firstrep	55	6	9	8	247.784	145.328	102.456	1006.26	F07C3.7	aat-2	27	25
D2	firstrep	55	6	9	9	231.826	153.796	78.03	923.985	F07C3.7	aat-2	27	25
D2	firstrep	55	6	9	10	174.117	167.738	6.379	1065.89	F07C3.7	aat-2	27	25
D2	firstrep	55	6	9	11	218.448	141.588	76.86	1047.78	F07C3.7	aat-2	27	25
D2	firstrep	55	6	9	12	253.776	151.055	102.721	929.155	F07C3.7	aat-2	27	25
D2	firstrep	55	6	9	13	153.047	152.086	0.961	1017.69	F07C3.7	aat-2	27	25
D2	firstrep	55	6	9	14	273.358	170.285	103.073	1066.48	F07C3.7	aat-2	27	25
D2	firstrep	55	6	9	15	271.26	147.736	123.523	1045.09	F07C3.7	aat-2	27	25
D2	firstrep	55	6	9	16	229.792	134.298	95.494	1034.9	F07C3.7	aat-2	27	25
D2	firstrep	55	6	9	17	257.701	151.119	106.582	957.853	F07C3.7	aat-2	27	25
D2	firstrep	55	6	9	18	264.933	165.211	99.722	1088.43	F07C3.7	aat-2	27	25
D2	firstrep	55	6	9	19	219.094	142.874	76.221	1159.13	F07C3.7	aat-2	27	25
D2	firstrep	55	6	9	20	224.92	139.783	85.137	845.687	F07C3.7	aat-2	27	25
D2	firstrep	55	6	9	21	249.116	171.098	78.018	939.518	F07C3.7	aat-2	27	25
D2	firstrep	55	6	9	22	270.384	149.7	120.684	975.078	F07C3.7	aat-2	27	25
D2	firstrep	55	6	9	23	280.3	154.794	125.506	1038.09	F07C3.7	aat-2	27	25
D2	firstrep	55	6	9	24	196.17	180.987	15.183	891.639	F07C3.7	aat-2	27	25
D2	firstrep	55	6	9	25	143.088	139.802	3.286	607.465	F07C3.7	aat-2	27	25
D2	firstrep	55	6	9	26	220.732	151.288	69.444	1047.01	F07C3.7	aat-2	27	25
D2	firstrep	55	6	9	27	182.627	175.446	7.181	1049.63	F07C3.7	aat-2	27	25
WT	firstrep	55	6	9	1	269.498	139.676	129.822	1090.08	F07C3.7	aat-2	35	35
WT	firstrep	55	6	9	2	250.345	134.631	115.714	1044.98	F07C3.7	aat-2	35	35
WT	firstrep	55	6	9	3	340.887	141.722	199.165	995.958	F07C3.7	aat-2	35	35
WT	firstrep	55	6	9	4	326.502	137.575	188.927	953.653	F07C3.7	aat-2	35	35
WT	firstrep	55	6	9	5	303.964	143.657	160.306	1036.73	F07C3.7	aat-2	35	35
WT	firstrep	55	6	9	6	262.86	139.624	123.236	966.188	F07C3.7	aat-2	35	35
WT	firstrep	55	6	9	7	300.593	142.516	158.077	971.441	F07C3.7	aat-2	35	35
WT	firstrep	55	6	9	8	304.56	141.471	163.089	974.712	F07C3.7	aat-2	35	35
WT	firstrep	55	6	9	9	290.353	142.692	147.661	957.199	F07C3.7	aat-2	35	35
WT	firstrep	55	6	9	10	269.803	137.25	132.553	906.736	F07C3.7	aat-2	35	35
WT	firstrep	55	6	9	11	257.123	147.459	109.663	965.506	F07C3.7	aat-2	35	35
WT	firstrep	55	6	9	12	181.232	139.325	41.908	742.469	F07C3.7	aat-2	35	35
WT	firstrep	55	6	9	13	315.545	139.208	176.337	969.756	F07C3.7	aat-2	35	35
WT	firstrep	55	6	9	14	257.974	144.175	113.799	984.767	F07C3.7	aat-2	35	35
WT	firstrep	55	6	9	15	238.737	136.659	102.077	1018.52	F07C3.7	aat-2	35	35
WT	firstrep	55	6	9	16	319.212	151.311	167.901	1112.02	F07C3.7	aat-2	35	35
WT	firstrep	55	6	9	17	248.212	158.41	89.802	1016.58	F07C3.7	aat-2	35	35
WT	firstrep	55	6	9	18	225.422	134.421	91.002	1027.58	F07C3.7	aat-2	35	35
WT	firstrep	55	6	9	19	292.361	139.938	152.423	1044.77	F07C3.7	aat-2	35	35
WT	firstrep	55	6	9	20	307.399	146.488	160.911	958.704	F07C3.7	aat-2	35	35
WT	firstrep	55	6	9	21	282.923	144.334	138.59	949.185	F07C3.7	aat-2	35	35
WT	firstrep	55	6	9	22	295.9	148.033	147.867	1000.61	F07C3.7	aat-2	35	35
WT	firstrep	55	6	9	23	250.46	139.641	110.819	932.164	F07C3.7	aat-2	35	35
WT	firstrep	55	6	9	24	280.732	138.768	141.964	931.318	F07C3.7	aat-2	35	35
WT	firstrep	55	6	9	25	272.621	146.669	125.951	939.871	F07C3.7	aat-2	35	35
WT	firstrep	55	6	9	26	330.182	150.459	179.723	1031.93	F07C3.7	aat-2	35	35
WT	firstrep	55	6	9	27	284.653	146.922	137.732	951.148	F07C3.7	aat-2	35	35
WT	firstrep	55	6	9	28	271.329	146.808	124.521	991.67	F07C3.7	aat-2	35	35
WT	firstrep	55	6	9	29	279.048	144.3	134.749	1034.52	F07C3.7	aat-2	35	35
WT	firstrep	55	6	9	30	226.555	140.146	86.41	1087.23	F07C3.7	aat-2	35	35
WT	firstrep	55	6	9	31	171.316	143.659	27.657	943.525	F07C3.7	aat-2	35	35
WT	firstrep	55	6	9	32	280.832	140.441	140.391	951.82	F07C3.7	aat-2	35	35
WT	firstrep	55	6	9	33	275.731	141.13	134.601	986.688	F07C3.7	aat-2	35	35
WT	firstrep	55	6	9	34	265.634	135.897	129.737	995.828	F07C3.7	aat-2	35	35
WT	firstrep	55	6	9	35	280.797	139.611	141.186	987.362	F07C3.7	aat-2	35	35
WT	secondrep	64	2	5	1	334.137	125.956	208.181	994.696	F52H2.2	aat-3	15	15
WT	secondrep	64	2	5	2	258.938	124.895	134.043	784.698	F52H2.2	aat-3	15	15
WT	secondrep	64	2	5	3	271.072	125.523	145.549	933.636	F52H2.2	aat-3	15	15
WT	secondrep	64	2	5	4	319.381	130.398	188.984	879.474	F52H2.2	aat-3	15	15
WT	secondrep	64	2	5	5	310.52	130.252	180.268	894.767	F52H2.2	aat-3	15	15
WT	secondrep	64	2	5	6	304.724	123.864	180.86	948.068	F52H2.2	aat-3	15	15
WT	secondrep	64	2	5	7	305.069	132.727	172.341	935.867	F52H2.2	aat-3	15	15
WT	secondrep	64	2	5	8	327.931	130.008	197.923	972.289	F52H2.2	aat-3	15	15
WT	secondrep	64	2	5	9	163.592	126.159	37.433	907.385	F52H2.2	aat-3	15	15
WT	secondrep	64	2	5	10	359.712	128.481	231.231	882.552	F52H2.2	aat-3	15	15
WT	secondrep	64	2	5	11	279.637	122.942	156.694	833.925	F52H2.2	aat-3	15	15
WT	secondrep	64	2	5	12	275.039	127.043	147.996	865.805	F52H2.2	aat-3	15	15
WT	secondrep	64	2	5	13	268.348	125.519	142.83	959.503	F52H2.2	aat-3	15	15
WT	secondrep	64	2	5	14	300.256	125.113	175.143	859.844	F52H2.2	aat-3	15	15
WT	secondrep	64	2	5	15	412.305	128.8	283.505	874.199	F52H2.2	aat-3	15	15
D2	firstrep	64	2	5	1	162.831	130.867	31.963	880.46	F52H2.2	aat-3	21	17
D2	firstrep	64	2	5	2	180.27	132.021	48.249	1273.8	F52H2.2	aat-3	21	17
D2	firstrep	64	2	5	3	250.726	133.184	117.542	818.327	F52H2.2	aat-3	21	17
D2	firstrep	64	2	5	4	134.905	130.548	4.357	555.628	F52H2.2	aat-3	21	17
D2	firstrep	64	2	5	5	162.368	133.888	28.48	847.152	F52H2.2	aat-3	21	17
D2	firstrep	64	2	5	6	182.85	133.485	49.364	726.282	F52H2.2	aat-3	21	17
D2	firstrep	64	2	5	7	201.194	137.103	64.091	802.439	F52H2.2	aat-3	21	17
D2	firstrep	64	2	5	8	131.987	130.328	1.659	506.925	F52H2.2	aat-3	21	17
D2	firstrep	64	2	5	9	213.6	139.358	74.242	1096.57	F52H2.2	aat-3	21	17
D2	firstrep	64	2	5	10	137.387	135.121	2.266	596.707	F52H2.2	aat-3	21	17
D2	firstrep	64	2	5	11	196.727	131.338	65.388	725.216	F52H2.2	aat-3	21	17
D2	firstrep	64	2	5	12	140.646	139.567	1.079	546.395	F52H2.2	aat-3	21	17
D2	firstrep	64	2	5	13	192.972	131.489	61.483	770.246	F52H2.2	aat-3	21	17
D2	firstrep	64	2	5	14	161.087	136.662	24.425	858.937	F52H2.2	aat-3	21	17
D2	firstrep	64	2	5	15	190.1	139.02	51.079	851.429	F52H2.2	aat-3	21	17
D2	firstrep	64	2	5	16	205.766	141.936	63.83	783.453	F52H2.2	aat-3	21	17
D2	firstrep	64	2	5	17	198.715	131.704	67.011	750.068	F52H2.2	aat-3	21	17
D2	firstrep	64	2	5	18	198.685	139.54	59.145	805.697	F52H2.2	aat-3	21	17
D2	firstrep	64	2	5	19	180.254	135.72	44.534	828.168	F52H2.2	aat-3	21	17
D2	firstrep	64	2	5	20	196.983	136.403	60.579	826.552	F52H2.2	aat-3	21	17
D2	firstrep	64	2	5	21	171.238	132.598	38.64	832.858	F52H2.2	aat-3	21	17
D2	secondrep	64	2	5	1	120.898	119.12	1.778	555.733	F52H2.2	aat-3	21	20
D2	secondrep	64	2	5	2	171.538	119.851	51.688	880.937	F52H2.2	aat-3	21	20
D2	secondrep	64	2	5	3	175.856	122.286	53.57	1034.93	F52H2.2	aat-3	21	20
D2	secondrep	64	2	5	4	198.996	122.328	76.669	951.738	F52H2.2	aat-3	21	20
D2	secondrep	64	2	5	5	182.383	122.047	60.336	975.761	F52H2.2	aat-3	21	20
D2	secondrep	64	2	5	6	153.16	122.375	30.784	749.915	F52H2.2	aat-3	21	20
D2	secondrep	64	2	5	7	181.695	122.921	58.774	1016.03	F52H2.2	aat-3	21	20
D2	secondrep	64	2	5	8	184.625	124.103	60.522	1370.68	F52H2.2	aat-3	21	20
D2	secondrep	64	2	5	9	197.783	123.895	73.888	1009.08	F52H2.2	aat-3	21	20
D2	secondrep	64	2	5	10	194.478	120.863	73.615	907.121	F52H2.2	aat-3	21	20
D2	secondrep	64	2	5	11	190.521	121.318	69.203	931.501	F52H2.2	aat-3	21	20
D2	secondrep	64	2	5	12	206.864	125.326	81.537	985.184	F52H2.2	aat-3	21	20
D2	secondrep	64	2	5	13	188.135	124.043	64.092	892.536	F52H2.2	aat-3	21	20
D2	secondrep	64	2	5	14	175.352	121.429	53.923	1471.37	F52H2.2	aat-3	21	20
D2	secondrep	64	2	5	15	195.551	122.928	72.624	907.513	F52H2.2	aat-3	21	20
D2	secondrep	64	2	5	16	213.876	124.795	89.082	982.04	F52H2.2	aat-3	21	20
D2	secondrep	64	2	5	17	182.636	121.588	61.048	936.807	F52H2.2	aat-3	21	20
D2	secondrep	64	2	5	18	208.238	126.555	81.683	962.65	F52H2.2	aat-3	21	20
D2	secondrep	64	2	5	19	210.407	125.951	84.455	932.263	F52H2.2	aat-3	21	20
D2	secondrep	64	2	5	20	188.328	120.891	67.437	823.577	F52H2.2	aat-3	21	20
D2	secondrep	64	2	5	21	217.836	123.594	94.242	970.436	F52H2.2	aat-3	21	20
WT	firstrep	64	2	5	1	296.486	134.952	161.534	960.01	F52H2.2	aat-3	37	37
WT	firstrep	64	2	5	2	252.068	132.33	119.737	886.681	F52H2.2	aat-3	37	37
WT	firstrep	64	2	5	3	327.377	141.629	185.748	986.955	F52H2.2	aat-3	37	37
WT	firstrep	64	2	5	4	263.609	139.144	124.466	971.406	F52H2.2	aat-3	37	37
WT	firstrep	64	2	5	5	291.116	136.657	154.459	1058.42	F52H2.2	aat-3	37	37
WT	firstrep	64	2	5	6	302.045	143.033	159.012	979.28	F52H2.2	aat-3	37	37
WT	firstrep	64	2	5	7	384.709	144.138	240.572	1039.37	F52H2.2	aat-3	37	37
WT	firstrep	64	2	5	8	378.06	140.9	237.16	912.018	F52H2.2	aat-3	37	37
WT	firstrep	64	2	5	9	308.333	138.594	169.739	922.247	F52H2.2	aat-3	37	37
WT	firstrep	64	2	5	10	285.637	135.794	149.844	954.052	F52H2.2	aat-3	37	37
WT	firstrep	64	2	5	11	297.694	141.867	155.827	1007.76	F52H2.2	aat-3	37	37
WT	firstrep	64	2	5	12	367.993	148.834	219.159	905.558	F52H2.2	aat-3	37	37
WT	firstrep	64	2	5	13	312.108	147.865	164.243	962.397	F52H2.2	aat-3	37	37
WT	firstrep	64	2	5	14	342.111	137.619	204.492	976.004	F52H2.2	aat-3	37	37
WT	firstrep	64	2	5	15	347.326	137.656	209.671	890.775	F52H2.2	aat-3	37	37
WT	firstrep	64	2	5	16	437.972	146.135	291.837	963.907	F52H2.2	aat-3	37	37
WT	firstrep	64	2	5	17	271.891	133.793	138.098	949.549	F52H2.2	aat-3	37	37
WT	firstrep	64	2	5	18	248.156	135.65	112.505	904.007	F52H2.2	aat-3	37	37
WT	firstrep	64	2	5	19	287.872	139.021	148.851	1049.65	F52H2.2	aat-3	37	37
WT	firstrep	64	2	5	20	239.189	140.743	98.446	959.386	F52H2.2	aat-3	37	37
WT	firstrep	64	2	5	21	315.997	146.084	169.913	1011.86	F52H2.2	aat-3	37	37
WT	firstrep	64	2	5	22	333.723	139.31	194.414	959.38	F52H2.2	aat-3	37	37
WT	firstrep	64	2	5	23	332.642	136.893	195.749	971.236	F52H2.2	aat-3	37	37
WT	firstrep	64	2	5	24	312.259	140.506	171.754	905.094	F52H2.2	aat-3	37	37
WT	firstrep	64	2	5	25	291.809	133.41	158.399	957.556	F52H2.2	aat-3	37	37
WT	firstrep	64	2	5	26	332.414	143.991	188.423	966.413	F52H2.2	aat-3	37	37
WT	firstrep	64	2	5	27	306.626	141.007	165.618	923.924	F52H2.2	aat-3	37	37
WT	firstrep	64	2	5	28	271.5	137.261	134.24	993.102	F52H2.2	aat-3	37	37
WT	firstrep	64	2	5	29	337.581	142.756	194.825	821.661	F52H2.2	aat-3	37	37
WT	firstrep	64	2	5	30	315.149	141.605	173.545	980.538	F52H2.2	aat-3	37	37
WT	firstrep	64	2	5	31	261.276	135.671	125.605	885.427	F52H2.2	aat-3	37	37
WT	firstrep	64	2	5	32	378.725	139.42	239.306	896.841	F52H2.2	aat-3	37	37
WT	firstrep	64	2	5	33	285.081	135.899	149.182	940.653	F52H2.2	aat-3	37	37
WT	firstrep	64	2	5	34	334.26	136.372	197.888	678.484	F52H2.2	aat-3	37	37
WT	firstrep	64	2	5	35	234.85	134.036	100.815	1030.04	F52H2.2	aat-3	37	37
WT	firstrep	64	2	5	36	263.072	139.056	124.016	729.166	F52H2.2	aat-3	37	37
WT	firstrep	64	2	5	37	287.711	134.484	153.227	883.289	F52H2.2	aat-3	37	37
WT	firstrep	37	7	2	1	137.238	134.325	2.913	450.724	Y39E4B.1	abce-1	19	3
WT	firstrep	37	7	2	2	144.385	138.994	5.391	482.725	Y39E4B.1	abce-1	19	3
WT	firstrep	37	7	2	3	140.803	137.766	3.037	347.705	Y39E4B.1	abce-1	19	3
WT	firstrep	37	7	2	4	136.006	132.965	3.041	376.207	Y39E4B.1	abce-1	19	3
WT	firstrep	37	7	2	5	141.944	139.173	2.771	383.771	Y39E4B.1	abce-1	19	3
WT	firstrep	37	7	2	6	144.13	140.064	4.065	416.612	Y39E4B.1	abce-1	19	3
WT	firstrep	37	7	2	7	141.498	139.522	1.976	363.959	Y39E4B.1	abce-1	19	3
WT	firstrep	37	7	2	8	140.972	138.94	2.032	439.83	Y39E4B.1	abce-1	19	3
WT	firstrep	37	7	2	9	142.375	140.771	1.604	439.409	Y39E4B.1	abce-1	19	3
WT	firstrep	37	7	2	10	138.216	136.329	1.887	419.841	Y39E4B.1	abce-1	19	3
WT	firstrep	37	7	2	11	142.698	139.829	2.869	401.01	Y39E4B.1	abce-1	19	3
WT	firstrep	37	7	2	12	140.437	139.033	1.404	419.383	Y39E4B.1	abce-1	19	3
WT	firstrep	37	7	2	13	449.689	147.589	302.099	1035.27	Y39E4B.1	abce-1	19	3
WT	firstrep	37	7	2	14	136.463	133.275	3.188	621.223	Y39E4B.1	abce-1	19	3
WT	firstrep	37	7	2	15	137.416	133.953	3.464	332.427	Y39E4B.1	abce-1	19	3
WT	firstrep	37	7	2	16	316.351	138.426	177.925	1127.33	Y39E4B.1	abce-1	19	3
WT	firstrep	37	7	2	17	140.187	135.911	4.276	447.449	Y39E4B.1	abce-1	19	3
WT	firstrep	37	7	2	18	474.448	149.792	324.656	1030.62	Y39E4B.1	abce-1	19	3
WT	firstrep	37	7	2	19	141.422	137.509	3.913	370.743	Y39E4B.1	abce-1	19	3
D2	firstrep	37	7	2	1	132.767	131.984	0.783	361.759	Y39E4B.1	abce-1	16	4
D2	firstrep	37	7	2	2	132.877	131.618	1.26	460.189	Y39E4B.1	abce-1	16	4
D2	firstrep	37	7	2	3	141.529	129.359	12.17	558.644	Y39E4B.1	abce-1	16	4
D2	firstrep	37	7	2	4	129.886	128.81	1.076	405.566	Y39E4B.1	abce-1	16	4
D2	firstrep	37	7	2	5	143.858	137.107	6.751	379.458	Y39E4B.1	abce-1	16	4
D2	firstrep	37	7	2	6	149.679	138.209	11.47	523.068	Y39E4B.1	abce-1	16	4
D2	firstrep	37	7	2	7	141.525	131.532	9.993	632.599	Y39E4B.1	abce-1	16	4
D2	firstrep	37	7	2	8	154.009	138.342	15.666	754.553	Y39E4B.1	abce-1	16	4
D2	firstrep	37	7	2	9	141.294	131.628	9.667	1044.13	Y39E4B.1	abce-1	16	4
D2	firstrep	37	7	2	10	133.466	129.497	3.969	548.102	Y39E4B.1	abce-1	16	4
D2	firstrep	37	7	2	11	146.668	139.592	7.075	528.612	Y39E4B.1	abce-1	16	4
D2	firstrep	37	7	2	12	139.104	138.215	0.889	397.032	Y39E4B.1	abce-1	16	4
D2	firstrep	37	7	2	13	142.738	137.006	5.732	916.402	Y39E4B.1	abce-1	16	4
D2	firstrep	37	7	2	14	140.91	131.834	9.076	685.289	Y39E4B.1	abce-1	16	4
D2	firstrep	37	7	2	15	144.058	140.208	3.85	367.845	Y39E4B.1	abce-1	16	4
D2	firstrep	37	7	2	16	143.581	134.407	9.174	388.258	Y39E4B.1	abce-1	16	4
WT	secondrep	37	7	2	1	304.388	135.322	169.067	737.314	Y39E4B.1	abce-1	25	24
WT	secondrep	37	7	2	2	333.034	134.455	198.579	959.341	Y39E4B.1	abce-1	25	24
WT	secondrep	37	7	2	3	263.774	132.848	130.926	775.907	Y39E4B.1	abce-1	25	24
WT	secondrep	37	7	2	4	328.495	135.21	193.285	942.069	Y39E4B.1	abce-1	25	24
WT	secondrep	37	7	2	5	301.873	135.602	166.271	832.527	Y39E4B.1	abce-1	25	24
WT	secondrep	37	7	2	6	353.765	135.527	218.238	895.574	Y39E4B.1	abce-1	25	24
WT	secondrep	37	7	2	7	257.821	132.599	125.222	828.022	Y39E4B.1	abce-1	25	24
WT	secondrep	37	7	2	8	418.566	143.609	274.956	671.39	Y39E4B.1	abce-1	25	24
WT	secondrep	37	7	2	9	352.406	140.419	211.987	935.35	Y39E4B.1	abce-1	25	24
WT	secondrep	37	7	2	10	258.663	143.77	114.894	756.354	Y39E4B.1	abce-1	25	24
WT	secondrep	37	7	2	11	340.315	139.321	200.994	1013.4	Y39E4B.1	abce-1	25	24
WT	secondrep	37	7	2	12	356.425	136.76	219.665	905.007	Y39E4B.1	abce-1	25	24
WT	secondrep	37	7	2	13	472.126	146.374	325.753	873.922	Y39E4B.1	abce-1	25	24
WT	secondrep	37	7	2	14	313.3	134.355	178.945	904.987	Y39E4B.1	abce-1	25	24
WT	secondrep	37	7	2	15	144.002	142.846	1.156	478.865	Y39E4B.1	abce-1	25	24
WT	secondrep	37	7	2	16	308.049	147.83	160.218	890.184	Y39E4B.1	abce-1	25	24
WT	secondrep	37	7	2	17	299.056	137.353	161.702	924.951	Y39E4B.1	abce-1	25	24
WT	secondrep	37	7	2	18	372.278	137.385	234.893	892.346	Y39E4B.1	abce-1	25	24
WT	secondrep	37	7	2	19	580.67	153.748	426.921	863.225	Y39E4B.1	abce-1	25	24
WT	secondrep	37	7	2	20	269.529	141.171	128.358	875.28	Y39E4B.1	abce-1	25	24
WT	secondrep	37	7	2	21	319.987	137.169	182.818	880.688	Y39E4B.1	abce-1	25	24
WT	secondrep	37	7	2	22	369.386	141.769	227.617	934.1	Y39E4B.1	abce-1	25	24
WT	secondrep	37	7	2	23	358.334	136.302	222.031	902.106	Y39E4B.1	abce-1	25	24
WT	secondrep	37	7	2	24	316.569	137.824	178.745	921.46	Y39E4B.1	abce-1	25	24
WT	secondrep	37	7	2	25	348.548	138.518	210.03	917.912	Y39E4B.1	abce-1	25	24
D2	secondrep	37	7	2	1	169.657	129.642	40.015	689.726	Y39E4B.1	abce-1	33	24
D2	secondrep	37	7	2	2	194.694	132.336	62.358	720.772	Y39E4B.1	abce-1	33	24
D2	secondrep	37	7	2	3	166.622	127.867	38.756	729.68	Y39E4B.1	abce-1	33	24
D2	secondrep	37	7	2	4	166.372	131.191	35.181	720.251	Y39E4B.1	abce-1	33	24
D2	secondrep	37	7	2	5	143.103	129.201	13.902	470.732	Y39E4B.1	abce-1	33	24
D2	secondrep	37	7	2	6	132.301	130.6	1.701	535.216	Y39E4B.1	abce-1	33	24
D2	secondrep	37	7	2	7	230.691	135.59	95.101	1377.56	Y39E4B.1	abce-1	33	24
D2	secondrep	37	7	2	8	171.967	134.368	37.599	643.688	Y39E4B.1	abce-1	33	24
D2	secondrep	37	7	2	9	211.18	132.747	78.432	763.196	Y39E4B.1	abce-1	33	24
D2	secondrep	37	7	2	10	189.476	136.916	52.56	782.838	Y39E4B.1	abce-1	33	24
D2	secondrep	37	7	2	11	178.163	129.795	48.369	681.869	Y39E4B.1	abce-1	33	24
D2	secondrep	37	7	2	12	223.206	141.419	81.788	782.733	Y39E4B.1	abce-1	33	24
D2	secondrep	37	7	2	13	133.752	130.512	3.24	399.455	Y39E4B.1	abce-1	33	24
D2	secondrep	37	7	2	14	141.06	137.159	3.9	687.777	Y39E4B.1	abce-1	33	24
D2	secondrep	37	7	2	15	216.251	140.348	75.903	705.849	Y39E4B.1	abce-1	33	24
D2	secondrep	37	7	2	16	142.779	134.748	8.031	676.681	Y39E4B.1	abce-1	33	24
D2	secondrep	37	7	2	17	171.234	132.971	38.263	777.587	Y39E4B.1	abce-1	33	24
D2	secondrep	37	7	2	18	196.38	131.128	65.252	1424.01	Y39E4B.1	abce-1	33	24
D2	secondrep	37	7	2	19	243.888	138.547	105.341	787.851	Y39E4B.1	abce-1	33	24
D2	secondrep	37	7	2	20	197.796	142.803	54.992	678.156	Y39E4B.1	abce-1	33	24
D2	secondrep	37	7	2	21	205.478	132.204	73.274	814.939	Y39E4B.1	abce-1	33	24
D2	secondrep	37	7	2	22	154.603	138.36	16.243	601.144	Y39E4B.1	abce-1	33	24
D2	secondrep	37	7	2	23	233.375	140.713	92.661	713.068	Y39E4B.1	abce-1	33	24
D2	secondrep	37	7	2	24	188.63	140.066	48.564	798.633	Y39E4B.1	abce-1	33	24
D2	secondrep	37	7	2	25	182.937	139.227	43.71	842.582	Y39E4B.1	abce-1	33	24
D2	secondrep	37	7	2	26	190.826	133.626	57.2	537.521	Y39E4B.1	abce-1	33	24
D2	secondrep	37	7	2	27	159.373	132.314	27.058	727.747	Y39E4B.1	abce-1	33	24
D2	secondrep	37	7	2	28	146.712	136.186	10.526	636.556	Y39E4B.1	abce-1	33	24
D2	secondrep	37	7	2	29	189.732	136.114	53.618	797.059	Y39E4B.1	abce-1	33	24
D2	secondrep	37	7	2	30	158.327	133.021	25.306	599.664	Y39E4B.1	abce-1	33	24
D2	secondrep	37	7	2	31	215.625	133.402	82.222	837.82	Y39E4B.1	abce-1	33	24
D2	secondrep	37	7	2	32	176.135	131.444	44.691	581.776	Y39E4B.1	abce-1	33	24
D2	secondrep	37	7	2	33	182.128	132.055	50.074	1285.67	Y39E4B.1	abce-1	33	24
WT	firstrep	59	1	2	1	250.536	123.969	126.567	932.43	F18E2.2	abcf-1	21	20
WT	firstrep	59	1	2	2	280.105	122.027	158.078	909.503	F18E2.2	abcf-1	21	20
WT	firstrep	59	1	2	3	245.599	121.16	124.439	949.365	F18E2.2	abcf-1	21	20
WT	firstrep	59	1	2	4	281.199	124.701	156.498	900.656	F18E2.2	abcf-1	21	20
WT	firstrep	59	1	2	5	271.369	125.938	145.432	1021.55	F18E2.2	abcf-1	21	20
WT	firstrep	59	1	2	6	181.999	121.329	60.671	893.808	F18E2.2	abcf-1	21	20
WT	firstrep	59	1	2	7	335.25	127.76	207.49	851.335	F18E2.2	abcf-1	21	20
WT	firstrep	59	1	2	8	300.213	126.293	173.919	927.159	F18E2.2	abcf-1	21	20
WT	firstrep	59	1	2	9	298.89	126.653	172.237	839.666	F18E2.2	abcf-1	21	20
WT	firstrep	59	1	2	10	313.234	124.729	188.505	942.066	F18E2.2	abcf-1	21	20
WT	firstrep	59	1	2	11	298.68	128.678	170.002	893.653	F18E2.2	abcf-1	21	20
WT	firstrep	59	1	2	12	334.236	130.091	204.145	865.25	F18E2.2	abcf-1	21	20
WT	firstrep	59	1	2	13	288.13	127.962	160.168	886.868	F18E2.2	abcf-1	21	20
WT	firstrep	59	1	2	14	275.389	123.755	151.634	881.443	F18E2.2	abcf-1	21	20
WT	firstrep	59	1	2	15	121.373	121.264	0.109	523.269	F18E2.2	abcf-1	21	20
WT	firstrep	59	1	2	16	322.88	127.037	195.843	935.336	F18E2.2	abcf-1	21	20
WT	firstrep	59	1	2	17	309.221	126.4	182.821	977.243	F18E2.2	abcf-1	21	20
WT	firstrep	59	1	2	18	287.576	125.944	161.632	907.467	F18E2.2	abcf-1	21	20
WT	firstrep	59	1	2	19	286.7	127.05	159.65	958.338	F18E2.2	abcf-1	21	20
WT	firstrep	59	1	2	20	267.07	126.366	140.704	956.004	F18E2.2	abcf-1	21	20
WT	firstrep	59	1	2	21	261.257	123.274	137.983	885.52	F18E2.2	abcf-1	21	20
WT	secondrep	59	1	2	1	229.105	123.424	105.681	961.157	F18E2.2	abcf-1	24	22
WT	secondrep	59	1	2	2	250.951	122.024	128.927	775.869	F18E2.2	abcf-1	24	22
WT	secondrep	59	1	2	3	308.02	127.952	180.067	927.391	F18E2.2	abcf-1	24	22
WT	secondrep	59	1	2	4	309.057	125.048	184.009	816.608	F18E2.2	abcf-1	24	22
WT	secondrep	59	1	2	5	257.603	123.031	134.572	946.19	F18E2.2	abcf-1	24	22
WT	secondrep	59	1	2	6	273.487	127.265	146.222	828.962	F18E2.2	abcf-1	24	22
WT	secondrep	59	1	2	7	269.504	128.338	141.166	861.24	F18E2.2	abcf-1	24	22
WT	secondrep	59	1	2	8	291.698	128.613	163.084	926.748	F18E2.2	abcf-1	24	22
WT	secondrep	59	1	2	9	259.69	122.651	137.039	979.292	F18E2.2	abcf-1	24	22
WT	secondrep	59	1	2	10	287.785	124.095	163.69	973.442	F18E2.2	abcf-1	24	22
WT	secondrep	59	1	2	11	301.582	129.657	171.925	993.742	F18E2.2	abcf-1	24	22
WT	secondrep	59	1	2	12	284.498	124.167	160.331	935.228	F18E2.2	abcf-1	24	22
WT	secondrep	59	1	2	13	250.475	132.137	118.338	1047.01	F18E2.2	abcf-1	24	22
WT	secondrep	59	1	2	14	127.814	126.938	0.876	867.449	F18E2.2	abcf-1	24	22
WT	secondrep	59	1	2	15	230.757	121.407	109.351	622.944	F18E2.2	abcf-1	24	22
WT	secondrep	59	1	2	16	264.313	128.581	135.732	847.23	F18E2.2	abcf-1	24	22
WT	secondrep	59	1	2	17	137.282	126.511	10.771	813.463	F18E2.2	abcf-1	24	22
WT	secondrep	59	1	2	18	272.047	126.844	145.203	900.413	F18E2.2	abcf-1	24	22
WT	secondrep	59	1	2	19	273.272	126.692	146.58	950.264	F18E2.2	abcf-1	24	22
WT	secondrep	59	1	2	20	127.162	122.844	4.318	852.77	F18E2.2	abcf-1	24	22
WT	secondrep	59	1	2	21	270.167	124.207	145.96	950.032	F18E2.2	abcf-1	24	22
WT	secondrep	59	1	2	22	267.689	124.57	143.118	1012.09	F18E2.2	abcf-1	24	22
WT	secondrep	59	1	2	23	357.231	126.1	231.131	827.899	F18E2.2	abcf-1	24	22
WT	secondrep	59	1	2	24	350.272	125.712	224.56	576.914	F18E2.2	abcf-1	24	22
D2	secondrep	59	1	2	1	170.584	120.278	50.307	903.508	F18E2.2	abcf-1	25	23
D2	secondrep	59	1	2	2	121.894	119.791	2.103	612.111	F18E2.2	abcf-1	25	23
D2	secondrep	59	1	2	3	167.464	120.576	46.888	696.026	F18E2.2	abcf-1	25	23
D2	secondrep	59	1	2	4	181.126	123.613	57.513	906.75	F18E2.2	abcf-1	25	23
D2	secondrep	59	1	2	5	209.829	122.428	87.4	728.5	F18E2.2	abcf-1	25	23
D2	secondrep	59	1	2	6	165.268	120.773	44.495	872.085	F18E2.2	abcf-1	25	23
D2	secondrep	59	1	2	7	171.586	124.585	47.001	958.791	F18E2.2	abcf-1	25	23
D2	secondrep	59	1	2	8	197.438	128.861	68.577	983.265	F18E2.2	abcf-1	25	23
D2	secondrep	59	1	2	9	158.781	128.852	29.929	960.338	F18E2.2	abcf-1	25	23
D2	secondrep	59	1	2	10	187.635	124.728	62.907	1010.48	F18E2.2	abcf-1	25	23
D2	secondrep	59	1	2	11	189.393	132.735	56.658	997.464	F18E2.2	abcf-1	25	23
D2	secondrep	59	1	2	12	199.562	122.908	76.654	1030.15	F18E2.2	abcf-1	25	23
D2	secondrep	59	1	2	13	194.473	129.664	64.809	1132.97	F18E2.2	abcf-1	25	23
D2	secondrep	59	1	2	14	176.203	124.188	52.015	1040.05	F18E2.2	abcf-1	25	23
D2	secondrep	59	1	2	15	135.476	128.753	6.723	580.721	F18E2.2	abcf-1	25	23
D2	secondrep	59	1	2	16	126.831	124.148	2.683	676.932	F18E2.2	abcf-1	25	23
D2	secondrep	59	1	2	17	191.166	142.041	49.125	970.551	F18E2.2	abcf-1	25	23
D2	secondrep	59	1	2	18	170.467	122.059	48.409	949.018	F18E2.2	abcf-1	25	23
D2	secondrep	59	1	2	19	177.777	123.414	54.363	1071.31	F18E2.2	abcf-1	25	23
D2	secondrep	59	1	2	20	203.241	126.31	76.931	965.297	F18E2.2	abcf-1	25	23
D2	secondrep	59	1	2	21	174.084	131.738	42.345	1003.45	F18E2.2	abcf-1	25	23
D2	secondrep	59	1	2	22	131.488	124.494	6.994	745.017	F18E2.2	abcf-1	25	23
D2	secondrep	59	1	2	23	165.064	126.236	38.828	812.225	F18E2.2	abcf-1	25	23
D2	secondrep	59	1	2	24	169.374	124.202	45.172	900.979	F18E2.2	abcf-1	25	23
D2	secondrep	59	1	2	25	166.47	121.622	44.848	1035.95	F18E2.2	abcf-1	25	23
D2	firstrep	59	1	2	1	194.973	134.417	60.556	1011.87	F18E2.2	abcf-1	35	33
D2	firstrep	59	1	2	2	225.223	135.273	89.95	1015.72	F18E2.2	abcf-1	35	33
D2	firstrep	59	1	2	3	190.956	133.039	57.918	1012.07	F18E2.2	abcf-1	35	33
D2	firstrep	59	1	2	4	212.465	132.92	79.545	1065.52	F18E2.2	abcf-1	35	33
D2	firstrep	59	1	2	5	186.088	138.181	47.907	1030.44	F18E2.2	abcf-1	35	33
D2	firstrep	59	1	2	6	190.714	137.357	53.358	881.991	F18E2.2	abcf-1	35	33
D2	firstrep	59	1	2	7	251.994	147.018	104.976	1441.99	F18E2.2	abcf-1	35	33
D2	firstrep	59	1	2	8	251.746	134.15	117.596	1030.52	F18E2.2	abcf-1	35	33
D2	firstrep	59	1	2	9	215.816	147.488	68.329	1113.4	F18E2.2	abcf-1	35	33
D2	firstrep	59	1	2	10	213.788	145.344	68.443	958.535	F18E2.2	abcf-1	35	33
D2	firstrep	59	1	2	11	226.192	144.267	81.924	1010.87	F18E2.2	abcf-1	35	33
D2	firstrep	59	1	2	12	210.294	145.114	65.179	1104.4	F18E2.2	abcf-1	35	33
D2	firstrep	59	1	2	13	255.972	153.265	102.707	1056.2	F18E2.2	abcf-1	35	33
D2	firstrep	59	1	2	14	281.96	158.802	123.159	926.156	F18E2.2	abcf-1	35	33
D2	firstrep	59	1	2	15	232.74	136.338	96.401	967.94	F18E2.2	abcf-1	35	33
D2	firstrep	59	1	2	16	217.6	137.341	80.259	1029.81	F18E2.2	abcf-1	35	33
D2	firstrep	59	1	2	17	246.338	161.752	84.586	1017.48	F18E2.2	abcf-1	35	33
D2	firstrep	59	1	2	18	205.889	141.376	64.513	1034.73	F18E2.2	abcf-1	35	33
D2	firstrep	59	1	2	19	304.389	145.903	158.486	920.907	F18E2.2	abcf-1	35	33
D2	firstrep	59	1	2	20	187.85	149.821	38.028	599.325	F18E2.2	abcf-1	35	33
D2	firstrep	59	1	2	21	197.026	142.747	54.279	962.383	F18E2.2	abcf-1	35	33
D2	firstrep	59	1	2	22	258.256	144.851	113.405	895.068	F18E2.2	abcf-1	35	33
D2	firstrep	59	1	2	23	213.767	137.607	76.16	958.105	F18E2.2	abcf-1	35	33
D2	firstrep	59	1	2	24	201.693	138.631	63.061	1138.31	F18E2.2	abcf-1	35	33
D2	firstrep	59	1	2	25	281.767	152.722	129.045	896.425	F18E2.2	abcf-1	35	33
D2	firstrep	59	1	2	26	242.266	154.371	87.895	1023.43	F18E2.2	abcf-1	35	33
D2	firstrep	59	1	2	27	230.585	142.706	87.878	997.661	F18E2.2	abcf-1	35	33
D2	firstrep	59	1	2	28	214.186	139.125	75.061	1037.26	F18E2.2	abcf-1	35	33
D2	firstrep	59	1	2	29	209.672	135.269	74.402	952.567	F18E2.2	abcf-1	35	33
D2	firstrep	59	1	2	30	217.434	136.203	81.231	981.895	F18E2.2	abcf-1	35	33
D2	firstrep	59	1	2	31	248.169	136.263	111.906	971.353	F18E2.2	abcf-1	35	33
D2	firstrep	59	1	2	32	207.205	137.321	69.884	931.782	F18E2.2	abcf-1	35	33
D2	firstrep	59	1	2	33	211.043	136.458	74.585	1013.49	F18E2.2	abcf-1	35	33
D2	firstrep	59	1	2	34	206.084	134.769	71.315	953.442	F18E2.2	abcf-1	35	33
D2	firstrep	59	1	2	35	152.094	132.438	19.656	477.921	F18E2.2	abcf-1	35	33
WT	firstrep	38	1	6	1	296.679	136.402	160.276	810.176	T27E9.7	abcf-2	24	23
WT	firstrep	38	1	6	2	312.184	137.894	174.29	920.208	T27E9.7	abcf-2	24	23
WT	firstrep	38	1	6	3	305.98	140.215	165.766	979.588	T27E9.7	abcf-2	24	23
WT	firstrep	38	1	6	4	334.427	138.7	195.727	984.158	T27E9.7	abcf-2	24	23
WT	firstrep	38	1	6	5	342.85	141.547	201.303	889.177	T27E9.7	abcf-2	24	23
WT	firstrep	38	1	6	6	248.171	137.61	110.561	921.929	T27E9.7	abcf-2	24	23
WT	firstrep	38	1	6	7	333.907	144.308	189.599	900.323	T27E9.7	abcf-2	24	23
WT	firstrep	38	1	6	8	380.184	136.127	244.057	554.381	T27E9.7	abcf-2	24	23
WT	firstrep	38	1	6	9	395.916	148.643	247.273	921.614	T27E9.7	abcf-2	24	23
WT	firstrep	38	1	6	10	278.211	145.758	132.453	668.608	T27E9.7	abcf-2	24	23
WT	firstrep	38	1	6	11	392.389	144.23	248.16	799.561	T27E9.7	abcf-2	24	23
WT	firstrep	38	1	6	12	357.316	144.486	212.83	947.045	T27E9.7	abcf-2	24	23
WT	firstrep	38	1	6	13	350.646	137.74	212.907	763.061	T27E9.7	abcf-2	24	23
WT	firstrep	38	1	6	14	390.836	145.997	244.84	958.97	T27E9.7	abcf-2	24	23
WT	firstrep	38	1	6	15	320.582	138.071	182.512	867.252	T27E9.7	abcf-2	24	23
WT	firstrep	38	1	6	16	242.698	149.743	92.955	898.156	T27E9.7	abcf-2	24	23
WT	firstrep	38	1	6	17	332.582	135.599	196.984	923.492	T27E9.7	abcf-2	24	23
WT	firstrep	38	1	6	18	442.176	151.339	290.837	845.246	T27E9.7	abcf-2	24	23
WT	firstrep	38	1	6	19	437.602	140.886	296.716	856.142	T27E9.7	abcf-2	24	23
WT	firstrep	38	1	6	20	314.689	141.522	173.167	852.31	T27E9.7	abcf-2	24	23
WT	firstrep	38	1	6	21	332.637	137.62	195.017	945.412	T27E9.7	abcf-2	24	23
WT	firstrep	38	1	6	22	348.588	136.694	211.894	899.382	T27E9.7	abcf-2	24	23
WT	firstrep	38	1	6	23	314.114	136.037	178.077	956.001	T27E9.7	abcf-2	24	23
WT	firstrep	38	1	6	24	377.474	137.504	239.97	946.64	T27E9.7	abcf-2	24	23
D2	firstrep	38	1	6	1	218.476	132.466	86.01	964.735	T27E9.7	abcf-2	24	24
D2	firstrep	38	1	6	2	210.529	136.786	73.743	1057.89	T27E9.7	abcf-2	24	24
D2	firstrep	38	1	6	3	188.541	139.252	49.289	959.031	T27E9.7	abcf-2	24	24
D2	firstrep	38	1	6	4	177.41	137.187	40.223	1027.05	T27E9.7	abcf-2	24	24
D2	firstrep	38	1	6	5	231.786	142.249	89.537	943.158	T27E9.7	abcf-2	24	24
D2	firstrep	38	1	6	6	187.122	129.143	57.979	856.783	T27E9.7	abcf-2	24	24
D2	firstrep	38	1	6	7	197.629	141.36	56.269	922.526	T27E9.7	abcf-2	24	24
D2	firstrep	38	1	6	8	247.831	145.51	102.321	914.019	T27E9.7	abcf-2	24	24
D2	firstrep	38	1	6	9	201.22	140.128	61.092	933.511	T27E9.7	abcf-2	24	24
D2	firstrep	38	1	6	10	236.418	144.522	91.896	947.205	T27E9.7	abcf-2	24	24
D2	firstrep	38	1	6	11	188.808	142.852	45.956	974.434	T27E9.7	abcf-2	24	24
D2	firstrep	38	1	6	12	191.568	132.883	58.685	1078.19	T27E9.7	abcf-2	24	24
D2	firstrep	38	1	6	13	237.672	143.658	94.014	846.226	T27E9.7	abcf-2	24	24
D2	firstrep	38	1	6	14	237.373	148.821	88.551	1039.65	T27E9.7	abcf-2	24	24
D2	firstrep	38	1	6	15	195.609	134.446	61.163	960.688	T27E9.7	abcf-2	24	24
D2	firstrep	38	1	6	16	202.714	140.508	62.206	912.668	T27E9.7	abcf-2	24	24
D2	firstrep	38	1	6	17	173.608	128.451	45.157	934.022	T27E9.7	abcf-2	24	24
D2	firstrep	38	1	6	18	249.008	141.28	107.728	966.505	T27E9.7	abcf-2	24	24
D2	firstrep	38	1	6	19	254.96	146.299	108.661	994.918	T27E9.7	abcf-2	24	24
D2	firstrep	38	1	6	20	210.381	136.613	73.768	1012.76	T27E9.7	abcf-2	24	24
D2	firstrep	38	1	6	21	219.062	144.205	74.857	915.672	T27E9.7	abcf-2	24	24
D2	firstrep	38	1	6	22	222.425	134.737	87.688	947.316	T27E9.7	abcf-2	24	24
D2	firstrep	38	1	6	23	224.8	136.463	88.337	934.024	T27E9.7	abcf-2	24	24
D2	firstrep	38	1	6	24	215.874	134.875	81	900.864	T27E9.7	abcf-2	24	24
WT	secondrep	38	1	6	1	233.46	121.064	112.395	951.104	T27E9.7	abcf-2	27	26
WT	secondrep	38	1	6	2	228.435	120.338	108.097	785.789	T27E9.7	abcf-2	27	26
WT	secondrep	38	1	6	3	276.701	122.562	154.139	770.527	T27E9.7	abcf-2	27	26
WT	secondrep	38	1	6	4	275.117	122.375	152.742	893.547	T27E9.7	abcf-2	27	26
WT	secondrep	38	1	6	5	283.023	123.241	159.783	880.471	T27E9.7	abcf-2	27	26
WT	secondrep	38	1	6	6	220.539	123.717	96.822	1021.39	T27E9.7	abcf-2	27	26
WT	secondrep	38	1	6	7	262.237	124.13	138.106	914.595	T27E9.7	abcf-2	27	26
WT	secondrep	38	1	6	8	353.098	122.661	230.437	801.479	T27E9.7	abcf-2	27	26
WT	secondrep	38	1	6	9	364.776	126.018	238.758	897.357	T27E9.7	abcf-2	27	26
WT	secondrep	38	1	6	10	274.633	124.42	150.212	963.086	T27E9.7	abcf-2	27	26
WT	secondrep	38	1	6	11	209.482	121.644	87.838	965.394	T27E9.7	abcf-2	27	26
WT	secondrep	38	1	6	12	231.393	124.768	106.625	1034.27	T27E9.7	abcf-2	27	26
WT	secondrep	38	1	6	13	302.626	126.411	176.215	845.479	T27E9.7	abcf-2	27	26
WT	secondrep	38	1	6	14	235.493	122.221	113.271	750.34	T27E9.7	abcf-2	27	26
WT	secondrep	38	1	6	15	267.683	128.003	139.68	966.476	T27E9.7	abcf-2	27	26
WT	secondrep	38	1	6	16	196.719	120.681	76.038	713.172	T27E9.7	abcf-2	27	26
WT	secondrep	38	1	6	17	300.172	128.642	171.531	797.249	T27E9.7	abcf-2	27	26
WT	secondrep	38	1	6	18	238.824	121.088	117.736	812.121	T27E9.7	abcf-2	27	26
WT	secondrep	38	1	6	19	251.9	123.575	128.325	952.763	T27E9.7	abcf-2	27	26
WT	secondrep	38	1	6	20	298.427	127.156	171.271	932.796	T27E9.7	abcf-2	27	26
WT	secondrep	38	1	6	21	180.369	122.357	58.012	940.657	T27E9.7	abcf-2	27	26
WT	secondrep	38	1	6	22	269.459	125.004	144.455	875.669	T27E9.7	abcf-2	27	26
WT	secondrep	38	1	6	23	311.417	129.009	182.408	823.21	T27E9.7	abcf-2	27	26
WT	secondrep	38	1	6	24	251.474	125.062	126.412	890.02	T27E9.7	abcf-2	27	26
WT	secondrep	38	1	6	25	301.739	128.111	173.628	798.027	T27E9.7	abcf-2	27	26
WT	secondrep	38	1	6	26	322.206	124.547	197.659	713.478	T27E9.7	abcf-2	27	26
WT	secondrep	38	1	6	27	119.554	119.648	-0.094	365.805	T27E9.7	abcf-2	27	26
D2	secondrep	38	1	6	1	191.798	132.979	58.819	865.534	T27E9.7	abcf-2	35	34
D2	secondrep	38	1	6	2	226.648	138.369	88.279	969.708	T27E9.7	abcf-2	35	34
D2	secondrep	38	1	6	3	203.225	134.223	69.002	947.5	T27E9.7	abcf-2	35	34
D2	secondrep	38	1	6	4	200.35	133.617	66.733	871.095	T27E9.7	abcf-2	35	34
D2	secondrep	38	1	6	5	173.457	129.174	44.283	849.859	T27E9.7	abcf-2	35	34
D2	secondrep	38	1	6	6	203.806	133.41	70.397	1427.48	T27E9.7	abcf-2	35	34
D2	secondrep	38	1	6	7	204.979	136.704	68.275	857.051	T27E9.7	abcf-2	35	34
D2	secondrep	38	1	6	8	148.29	172.484	-24.194	1008.02	T27E9.7	abcf-2	35	34
D2	secondrep	38	1	6	9	239.05	139.549	99.501	843.817	T27E9.7	abcf-2	35	34
D2	secondrep	38	1	6	10	174.248	160.995	13.253	934.542	T27E9.7	abcf-2	35	34
D2	secondrep	38	1	6	11	246.996	140.606	106.389	873.515	T27E9.7	abcf-2	35	34
D2	secondrep	38	1	6	12	192.395	129.69	62.705	887.858	T27E9.7	abcf-2	35	34
D2	secondrep	38	1	6	13	240.871	137.305	103.566	909.936	T27E9.7	abcf-2	35	34
D2	secondrep	38	1	6	14	205.749	142.023	63.727	762.643	T27E9.7	abcf-2	35	34
D2	secondrep	38	1	6	15	181.925	138.419	43.506	789.588	T27E9.7	abcf-2	35	34
D2	secondrep	38	1	6	16	223.413	143.125	80.288	870.641	T27E9.7	abcf-2	35	34
D2	secondrep	38	1	6	17	217.807	137.349	80.457	934.081	T27E9.7	abcf-2	35	34
D2	secondrep	38	1	6	18	174.668	141.21	33.458	698.584	T27E9.7	abcf-2	35	34
D2	secondrep	38	1	6	19	247.276	141.677	105.598	863.879	T27E9.7	abcf-2	35	34
D2	secondrep	38	1	6	20	160.253	148.781	11.472	916.695	T27E9.7	abcf-2	35	34
D2	secondrep	38	1	6	21	220.901	137.372	83.528	823.964	T27E9.7	abcf-2	35	34
D2	secondrep	38	1	6	22	247.365	145.668	101.697	976.937	T27E9.7	abcf-2	35	34
D2	secondrep	38	1	6	23	230.346	138.579	91.767	896.772	T27E9.7	abcf-2	35	34
D2	secondrep	38	1	6	24	234.555	134.407	100.147	1370.09	T27E9.7	abcf-2	35	34
D2	secondrep	38	1	6	25	214.64	141.695	72.945	891.146	T27E9.7	abcf-2	35	34
D2	secondrep	38	1	6	26	193.326	136.507	56.819	971.458	T27E9.7	abcf-2	35	34
D2	secondrep	38	1	6	27	143.954	139.179	4.774	503.999	T27E9.7	abcf-2	35	34
D2	secondrep	38	1	6	28	206.384	132.283	74.101	848.351	T27E9.7	abcf-2	35	34
D2	secondrep	38	1	6	29	217.108	138.65	78.459	746.44	T27E9.7	abcf-2	35	34
D2	secondrep	38	1	6	30	237.364	140.017	97.347	899.04	T27E9.7	abcf-2	35	34
D2	secondrep	38	1	6	31	220.632	138.886	81.746	893.803	T27E9.7	abcf-2	35	34
D2	secondrep	38	1	6	32	222.539	137.199	85.34	800.09	T27E9.7	abcf-2	35	34
D2	secondrep	38	1	6	33	133.21	128.51	4.699	675.875	T27E9.7	abcf-2	35	34
D2	secondrep	38	1	6	34	198.097	130.938	67.159	840.831	T27E9.7	abcf-2	35	34
D2	secondrep	38	1	6	35	258.535	133.239	125.296	742.581	T27E9.7	abcf-2	35	34
D2	secondrep	31	4	8	1	175.799	129.385	46.414	812.056	F42A10.1	abcf-3	30	25
D2	secondrep	31	4	8	2	177.873	129.39	48.483	813.321	F42A10.1	abcf-3	30	25
D2	secondrep	31	4	8	3	183.6	132.505	51.095	998.564	F42A10.1	abcf-3	30	25
D2	secondrep	31	4	8	4	170.538	133.352	37.186	840.375	F42A10.1	abcf-3	30	25
D2	secondrep	31	4	8	5	193.952	134.991	58.961	870.819	F42A10.1	abcf-3	30	25
D2	secondrep	31	4	8	6	165.908	134.851	31.057	890.371	F42A10.1	abcf-3	30	25
D2	secondrep	31	4	8	7	142.257	130.737	11.52	708.439	F42A10.1	abcf-3	30	25
D2	secondrep	31	4	8	8	163.025	134.751	28.274	574.764	F42A10.1	abcf-3	30	25
D2	secondrep	31	4	8	9	147.706	131.887	15.818	476.434	F42A10.1	abcf-3	30	25
D2	secondrep	31	4	8	10	207.569	135.548	72.021	841.807	F42A10.1	abcf-3	30	25
D2	secondrep	31	4	8	11	200.863	137.527	63.337	843.539	F42A10.1	abcf-3	30	25
D2	secondrep	31	4	8	12	179.588	137.566	42.022	695.217	F42A10.1	abcf-3	30	25
D2	secondrep	31	4	8	13	212.499	137.636	74.863	902.707	F42A10.1	abcf-3	30	25
D2	secondrep	31	4	8	14	180.464	138.471	41.994	727.559	F42A10.1	abcf-3	30	25
D2	secondrep	31	4	8	15	188.806	139.748	49.058	753.009	F42A10.1	abcf-3	30	25
D2	secondrep	31	4	8	16	197.322	140.866	56.456	886.939	F42A10.1	abcf-3	30	25
D2	secondrep	31	4	8	17	191.466	131.885	59.581	778.91	F42A10.1	abcf-3	30	25
D2	secondrep	31	4	8	18	221.67	136.098	85.572	896.268	F42A10.1	abcf-3	30	25
D2	secondrep	31	4	8	19	237.325	145.491	91.834	881.013	F42A10.1	abcf-3	30	25
D2	secondrep	31	4	8	20	224.827	150.584	74.243	763.852	F42A10.1	abcf-3	30	25
D2	secondrep	31	4	8	21	219.432	145.709	73.723	723.75	F42A10.1	abcf-3	30	25
D2	secondrep	31	4	8	22	217.713	156.048	61.665	883.124	F42A10.1	abcf-3	30	25
D2	secondrep	31	4	8	23	145.891	142.576	3.315	572.576	F42A10.1	abcf-3	30	25
D2	secondrep	31	4	8	24	144.683	139.246	5.437	614.84	F42A10.1	abcf-3	30	25
D2	secondrep	31	4	8	25	190.671	141.282	49.389	795.154	F42A10.1	abcf-3	30	25
D2	secondrep	31	4	8	26	243.518	140.121	103.397	851.782	F42A10.1	abcf-3	30	25
D2	secondrep	31	4	8	27	196.407	142.406	54.001	742.549	F42A10.1	abcf-3	30	25
D2	secondrep	31	4	8	28	207.079	141.664	65.415	770.708	F42A10.1	abcf-3	30	25
D2	secondrep	31	4	8	29	224.072	141.771	82.302	817.763	F42A10.1	abcf-3	30	25
D2	secondrep	31	4	8	30	198.82	130.642	68.178	644.604	F42A10.1	abcf-3	30	25
WT	firstrep	31	4	8	1	240.317	137.105	103.211	784.93	F42A10.1	abcf-3	31	28
WT	firstrep	31	4	8	2	267.143	139.936	127.208	1013.29	F42A10.1	abcf-3	31	28
WT	firstrep	31	4	8	3	274.015	143.457	130.558	632.862	F42A10.1	abcf-3	31	28
WT	firstrep	31	4	8	4	342.725	150.006	192.719	872.126	F42A10.1	abcf-3	31	28
WT	firstrep	31	4	8	5	308.214	146.95	161.264	809.433	F42A10.1	abcf-3	31	28
WT	firstrep	31	4	8	6	291.255	145.214	146.042	849.681	F42A10.1	abcf-3	31	28
WT	firstrep	31	4	8	7	158.757	136.565	22.192	373.292	F42A10.1	abcf-3	31	28
WT	firstrep	31	4	8	8	395.415	147.434	247.981	814.576	F42A10.1	abcf-3	31	28
WT	firstrep	31	4	8	9	442.427	151.321	291.106	915.119	F42A10.1	abcf-3	31	28
WT	firstrep	31	4	8	10	289.26	137.6	151.66	740.22	F42A10.1	abcf-3	31	28
WT	firstrep	31	4	8	11	306.634	146.391	160.243	772.941	F42A10.1	abcf-3	31	28
WT	firstrep	31	4	8	12	277.467	143.025	134.441	692.605	F42A10.1	abcf-3	31	28
WT	firstrep	31	4	8	13	336.176	138.575	197.601	788.393	F42A10.1	abcf-3	31	28
WT	firstrep	31	4	8	14	326.579	141.583	184.995	802.439	F42A10.1	abcf-3	31	28
WT	firstrep	31	4	8	15	275.904	151.349	124.555	729.907	F42A10.1	abcf-3	31	28
WT	firstrep	31	4	8	16	277.107	137.166	139.94	789.237	F42A10.1	abcf-3	31	28
WT	firstrep	31	4	8	17	448.57	148.981	299.59	890.63	F42A10.1	abcf-3	31	28
WT	firstrep	31	4	8	18	232.411	138.405	94.006	1129.91	F42A10.1	abcf-3	31	28
WT	firstrep	31	4	8	19	332.028	149.24	182.788	914.26	F42A10.1	abcf-3	31	28
WT	firstrep	31	4	8	20	339.527	139.188	200.339	565.548	F42A10.1	abcf-3	31	28
WT	firstrep	31	4	8	21	389.837	149.246	240.592	694.347	F42A10.1	abcf-3	31	28
WT	firstrep	31	4	8	22	354.213	148.91	205.303	823.641	F42A10.1	abcf-3	31	28
WT	firstrep	31	4	8	23	330.304	148.302	182.002	813.808	F42A10.1	abcf-3	31	28
WT	firstrep	31	4	8	24	317.852	141.751	176.101	668.37	F42A10.1	abcf-3	31	28
WT	firstrep	31	4	8	25	289.167	143.073	146.095	700.561	F42A10.1	abcf-3	31	28
WT	firstrep	31	4	8	26	341.148	141.684	199.464	756.647	F42A10.1	abcf-3	31	28
WT	firstrep	31	4	8	27	452.146	146.192	305.954	787.62	F42A10.1	abcf-3	31	28
WT	firstrep	31	4	8	28	321.617	140.991	180.626	745.136	F42A10.1	abcf-3	31	28
WT	firstrep	31	4	8	29	351.62	141.399	210.221	911.195	F42A10.1	abcf-3	31	28
WT	firstrep	31	4	8	30	283.654	139.915	143.739	712.77	F42A10.1	abcf-3	31	28
WT	firstrep	31	4	8	31	290.445	140.77	149.675	707.333	F42A10.1	abcf-3	31	28
WT	secondrep	31	4	8	1	365.393	136.53	228.864	917.76	F42A10.1	abcf-3	30	29
WT	secondrep	31	4	8	2	321.096	209.712	111.384	917.959	F42A10.1	abcf-3	30	29
WT	secondrep	31	4	8	3	400.86	146.081	254.778	910.466	F42A10.1	abcf-3	30	29
WT	secondrep	31	4	8	4	354.466	153.321	201.145	1015.7	F42A10.1	abcf-3	30	29
WT	secondrep	31	4	8	5	271.661	133.258	138.402	1085.31	F42A10.1	abcf-3	30	29
WT	secondrep	31	4	8	6	386.061	142.452	243.61	892.089	F42A10.1	abcf-3	30	29
WT	secondrep	31	4	8	7	419.019	144.06	274.959	911.679	F42A10.1	abcf-3	30	29
WT	secondrep	31	4	8	8	316.017	142.399	173.618	974.143	F42A10.1	abcf-3	30	29
WT	secondrep	31	4	8	9	330.221	146.383	183.838	970.146	F42A10.1	abcf-3	30	29
WT	secondrep	31	4	8	10	287.066	132.228	154.838	920.501	F42A10.1	abcf-3	30	29
WT	secondrep	31	4	8	11	374.981	136.579	238.402	795.566	F42A10.1	abcf-3	30	29
WT	secondrep	31	4	8	12	379.128	148.187	230.941	1021.98	F42A10.1	abcf-3	30	29
WT	secondrep	31	4	8	13	373.325	137.999	235.325	822.446	F42A10.1	abcf-3	30	29
WT	secondrep	31	4	8	14	202.095	132.453	69.641	825.972	F42A10.1	abcf-3	30	29
WT	secondrep	31	4	8	15	423.8	145.478	278.322	892.492	F42A10.1	abcf-3	30	29
WT	secondrep	31	4	8	16	307.451	139.007	168.444	1004.29	F42A10.1	abcf-3	30	29
WT	secondrep	31	4	8	17	460.185	193.763	266.422	921.652	F42A10.1	abcf-3	30	29
WT	secondrep	31	4	8	18	418.398	145.944	272.455	885.718	F42A10.1	abcf-3	30	29
WT	secondrep	31	4	8	19	312.991	135.575	177.416	1030.94	F42A10.1	abcf-3	30	29
WT	secondrep	31	4	8	20	433.138	149.258	283.88	1063.57	F42A10.1	abcf-3	30	29
WT	secondrep	31	4	8	21	306.251	134.892	171.359	895.205	F42A10.1	abcf-3	30	29
WT	secondrep	31	4	8	22	383.603	144.708	238.895	969.469	F42A10.1	abcf-3	30	29
WT	secondrep	31	4	8	23	322.145	134.283	187.862	985.835	F42A10.1	abcf-3	30	29
WT	secondrep	31	4	8	24	420.372	137.967	282.405	777.35	F42A10.1	abcf-3	30	29
WT	secondrep	31	4	8	25	142.187	137.636	4.551	697.064	F42A10.1	abcf-3	30	29
WT	secondrep	31	4	8	26	333.367	137.642	195.725	971.216	F42A10.1	abcf-3	30	29
WT	secondrep	31	4	8	27	405.155	143.245	261.91	974.375	F42A10.1	abcf-3	30	29
WT	secondrep	31	4	8	28	411.007	142.634	268.374	885.998	F42A10.1	abcf-3	30	29
WT	secondrep	31	4	8	29	386.259	140.118	246.141	857.104	F42A10.1	abcf-3	30	29
WT	secondrep	31	4	8	30	172.438	130.829	41.609	632.799	F42A10.1	abcf-3	30	29
D2	firstrep	31	4	8	1	254.671	134.729	119.942	886.852	F42A10.1	abcf-3	53	53
D2	firstrep	31	4	8	2	222.904	143.83	79.075	912.59	F42A10.1	abcf-3	53	53
D2	firstrep	31	4	8	3	247.131	135.898	111.233	823.627	F42A10.1	abcf-3	53	53
D2	firstrep	31	4	8	4	319.112	140.145	178.967	964.224	F42A10.1	abcf-3	53	53
D2	firstrep	31	4	8	5	256.964	136.404	120.56	864.554	F42A10.1	abcf-3	53	53
D2	firstrep	31	4	8	6	250.163	134.911	115.251	861.877	F42A10.1	abcf-3	53	53
D2	firstrep	31	4	8	7	233.835	143.076	90.759	837.341	F42A10.1	abcf-3	53	53
D2	firstrep	31	4	8	8	232.464	138.011	94.453	878.419	F42A10.1	abcf-3	53	53
D2	firstrep	31	4	8	9	242.358	143.272	99.086	817.941	F42A10.1	abcf-3	53	53
D2	firstrep	31	4	8	10	236.866	144.912	91.954	857.055	F42A10.1	abcf-3	53	53
D2	firstrep	31	4	8	11	293.978	146.349	147.629	841.585	F42A10.1	abcf-3	53	53
D2	firstrep	31	4	8	12	243.11	136.743	106.368	864.239	F42A10.1	abcf-3	53	53
D2	firstrep	31	4	8	13	259.606	144.466	115.14	912.693	F42A10.1	abcf-3	53	53
D2	firstrep	31	4	8	14	295.202	140.018	155.183	870.9	F42A10.1	abcf-3	53	53
D2	firstrep	31	4	8	15	278.167	146.346	131.821	878.636	F42A10.1	abcf-3	53	53
D2	firstrep	31	4	8	16	254.484	147.033	107.451	975.321	F42A10.1	abcf-3	53	53
D2	firstrep	31	4	8	17	229.999	136.652	93.347	870.935	F42A10.1	abcf-3	53	53
D2	firstrep	31	4	8	18	218.392	133.428	84.964	788.834	F42A10.1	abcf-3	53	53
D2	firstrep	31	4	8	19	278.787	149.098	129.689	823.885	F42A10.1	abcf-3	53	53
D2	firstrep	31	4	8	20	314.072	151.427	162.645	892.319	F42A10.1	abcf-3	53	53
D2	firstrep	31	4	8	21	232.535	140.877	91.657	807.708	F42A10.1	abcf-3	53	53
D2	firstrep	31	4	8	22	322.782	146.5	176.282	896.583	F42A10.1	abcf-3	53	53
D2	firstrep	31	4	8	23	278.659	146.219	132.44	834.159	F42A10.1	abcf-3	53	53
D2	firstrep	31	4	8	24	217.398	140.831	76.567	794.031	F42A10.1	abcf-3	53	53
D2	firstrep	31	4	8	25	263.086	139.913	123.172	830.498	F42A10.1	abcf-3	53	53
D2	firstrep	31	4	8	26	275.036	135.811	139.226	704.881	F42A10.1	abcf-3	53	53
D2	firstrep	31	4	8	27	325.545	149.133	176.412	911.676	F42A10.1	abcf-3	53	53
D2	firstrep	31	4	8	28	261.6	140.22	121.381	798.751	F42A10.1	abcf-3	53	53
D2	firstrep	31	4	8	29	259.74	152.535	107.205	910.153	F42A10.1	abcf-3	53	53
D2	firstrep	31	4	8	30	339.417	147.139	192.278	980.124	F42A10.1	abcf-3	53	53
D2	firstrep	31	4	8	31	244.794	149.191	95.602	768.509	F42A10.1	abcf-3	53	53
[truncated: 771,824+ more rows]

## Sheet: Removed genes
worms.GeneName	worms.plate	worms.row	worms.column	WT_firstrep	WT_secondrep	D2_firstrep	D2_secondrep
4R79.2	49	7	3	kept	kept	kept	kept
6R55.1	72	8	4	kept	kept	kept	kept
aagr-2	17	3	8	kept	kept	kept	kept
aagr-4	63	1	11	kept	removed	kept	kept
aak-1	34	4	5	kept	kept	kept	kept
aak-2	72	5	7	kept	kept	kept	kept
aakb-1	71	1	6	kept	kept	kept	kept
aakb-2	36	7	10	kept	kept	kept	kept
aakg-1	37	4	9	removed	kept	removed	kept
aars-1	24	3	4	kept	kept	kept	kept
aars-2	2	3	8	removed	kept	removed	removed
aat-1	44	5	9	kept	kept	kept	kept
aat-2	55	6	9	kept	removed	kept	removed
aat-3	64	2	5	kept	kept	kept	kept
abce-1	37	7	2	removed	kept	removed	kept
abcf-1	59	1	2	kept	kept	kept	kept
abcf-2	38	1	6	kept	kept	kept	kept
abcf-3	31	4	8	kept	kept	kept	kept
abch-1	19	1	4	kept	kept	kept	kept
abhd-11.1	10	5	11	removed	kept	kept	kept
abhd-12	63	1	5	kept	kept	kept	kept
abhd-14	50	3	10	kept	kept	kept	kept
abhd-3.2	63	4	10	kept	kept	kept	kept
abhd-5.1	52	6	1	kept	kept	kept	kept
abhd-5.2	52	6	2	kept	kept	kept	kept
abi-1	30	8	4	kept	kept	removed	kept
abl-1	69	2	11	kept	kept	removed	kept
abt-2	1	5	2	kept	kept	kept	kept
abt-4	50	8	1	removed	kept	kept	kept
abt-5	10	8	3	kept	kept	removed	kept
abt-6	4	7	2	kept	kept	kept	kept
abtm-1	13	5	5	removed	kept	removed	kept
abts-1	7	3	8	kept	kept	removed	kept
abts-2	69	7	11	kept	kept	removed	kept
abts-4	66	8	7	kept	kept	kept	kept
AC3.5	56	7	1	kept	kept	kept	kept
AC8.1	41	2	2	kept	kept	kept	kept
acbp-1	3	1	2	kept	kept	kept	kept
acbp-3	69	4	4	kept	kept	kept	kept
acbp-4	32	8	1	kept	kept	kept	kept
acbp-6	24	8	1	kept	kept	kept	kept
acd-1	2	4	2	empty	kept	kept	kept
acd-2	2	4	3	kept	kept	kept	kept
acd-4	55	3	11	kept	removed	kept	kept
acd-5	1	8	6	kept	kept	removed	kept
acdh-1	5	2	10	removed	kept	kept	kept
acdh-10	72	6	6	kept	kept	kept	kept
acdh-12	19	7	10	kept	kept	kept	kept
acdh-3	5	2	5	kept	kept	kept	kept
acdh-4	5	3	5	kept	kept	removed	kept
acdh-7	72	6	8	kept	kept	kept	kept
acdh-8	18	3	8	kept	kept	kept	kept
acdh-9	15	4	5	kept	kept	removed	kept
acdh-9	15	4	7	kept	kept	removed	kept
ace-1	72	4	2	kept	kept	kept	kept
ace-3	26	1	3	kept	kept	removed	kept
ace-4	26	1	2	kept	kept	kept	kept
acin-1	2	5	6	kept	kept	removed	kept
acl-1	72	2	6	kept	kept	kept	kept
acl-12	67	3	7	removed	kept	kept	kept
acl-13	47	6	9	kept	kept	kept	kept
acl-14	55	7	8	kept	kept	kept	kept
acl-2	56	3	10	kept	kept	kept	kept
acl-3	47	1	5	kept	kept	kept	kept
acl-6	52	8	4	kept	kept	kept	kept
acl-7	27	1	3	kept	kept	kept	kept
acl-8	53	6	4	kept	kept	kept	kept
acl-9	53	6	11	kept	kept	kept	kept
acly-1	63	6	9	kept	kept	kept	kept
acly-2	59	3	4	kept	kept	kept	kept
acn-1	65	6	10	removed	kept	removed	removed
aco-2	33	5	5	kept	kept	kept	kept
acox-1	11	6	10	kept	removed	kept	kept
acox-2	11	6	11	kept	empty	kept	kept
acox-3	11	7	1	kept	kept	kept	kept
acox-5	35	2	11	kept	kept	kept	kept
acp-1	64	6	2	kept	kept	kept	kept
acp-2	21	2	5	kept	kept	kept	kept
acp-3	21	2	4	kept	kept	kept	kept
acp-5	66	2	10	kept	kept	kept	kept
acr-10	64	8	6	kept	kept	kept	kept
acr-11	5	4	5	kept	kept	removed	kept
acr-14	20	7	8	kept	kept	kept	kept
acr-15	55	3	1	kept	kept	kept	kept
acr-16	55	2	11	kept	kept	kept	kept
acr-17	51	6	10	kept	kept	kept	kept
acr-18	60	8	8	kept	kept	kept	kept
acr-19	8	2	10	removed	kept	kept	kept
acr-2	66	7	11	removed	kept	kept	kept
acr-20	26	2	6	kept	kept	kept	kept
acr-23	52	2	6	kept	kept	kept	removed
acr-3	66	8	5	kept	kept	kept	kept
acr-5	32	1	3	kept	kept	kept	kept
acr-7	20	4	5	kept	kept	kept	kept
acr-9	71	1	1	kept	kept	removed	kept
acs-1	53	7	6	kept	removed	removed	removed
acs-11	17	2	2	kept	kept	kept	kept
acs-12	62	7	1	kept	kept	removed	kept
acs-13	14	3	10	kept	kept	removed	kept
acs-14	55	8	4	kept	kept	kept	kept
acs-15	15	5	5	kept	kept	kept	kept
acs-16	1	4	8	kept	kept	removed	kept
acs-17	66	3	6	kept	kept	kept	kept
acs-18	45	5	7	kept	kept	kept	kept
acs-19	28	4	11	kept	kept	kept	kept
acs-2	60	8	9	kept	kept	kept	kept
acs-20	47	6	6	kept	kept	kept	kept
acs-21	51	8	11	kept	kept	kept	kept
acs-22	68	2	7	kept	kept	kept	kept
acs-4	32	6	3	kept	kept	kept	kept
acs-5	38	1	9	kept	kept	kept	kept
acs-7	22	2	7	kept	kept	kept	kept
acsd-1	27	6	11	removed	kept	kept	kept
acsd-1	27	7	2	kept	kept	kept	kept
act-1	57	4	2	kept	removed	removed	removed
act-2	57	4	1	kept	kept	kept	kept
act-3	57	3	11	kept	removed	removed	removed
act-4	65	5	10	kept	kept	removed	removed
act-5	38	2	2	removed	removed	removed	removed
acy-1	29	5	9	kept	kept	kept	kept
acy-2	53	4	3	kept	kept	kept	kept
acy-3	28	4	1	kept	kept	kept	kept
ada-2	19	8	3	kept	kept	kept	kept
add-1	65	5	2	kept	kept	removed	kept
add-2	58	2	9	kept	kept	kept	kept
adm-2	71	1	4	kept	kept	kept	kept
adm-4	67	5	10	removed	kept	removed	kept
adr-2	32	7	3	kept	kept	kept	kept
adsl-1	6	2	7	kept	kept	kept	kept
adss-1	52	6	4	kept	kept	kept	kept
aex-3	63	2	11	kept	kept	removed	kept
aex-6	12	3	1	kept	kept	kept	kept
afd-1	1	5	3	removed	kept	removed	kept
age-1	24	4	3	kept	kept	kept	kept
agef-1	12	3	8	kept	kept	kept	kept
agl-1	26	2	5	kept	kept	kept	kept
agmo-1	37	5	6	removed	kept	kept	kept
agr-1	19	3	3	kept	kept	kept	kept
ags-3	65	8	1	kept	kept	kept	kept
agxt-1	21	7	2	kept	kept	kept	kept
aha-1	9	6	8	kept	kept	removed	kept
ahcy-1	5	6	3	kept	kept	removed	kept
aho-3	7	1	9	kept	kept	removed	kept
ahr-1	8	7	11	kept	kept	kept	kept
aip-1	59	8	11	kept	kept	kept	kept
aipl-1	60	6	9	kept	kept	kept	kept
air-1	54	8	2	kept	kept	kept	kept
ajm-1	68	3	7	removed	kept	kept	kept
aka-1	20	1	10	kept	kept	kept	kept
akap-1	31	6	2	kept	kept	kept	kept
akt-1	56	5	6	kept	kept	kept	kept
aldo-1	38	1	11	kept	kept	kept	kept
aldo-2	31	2	3	kept	kept	kept	kept
alfa-1	20	3	2	kept	kept	kept	kept
alg-1	71	1	11	kept	kept	removed	kept
alg-2	15	5	1	kept	kept	removed	kept
algn-1	31	8	7	kept	kept	kept	kept
algn-11	32	7	10	kept	kept	kept	kept
algn-13	59	8	9	kept	kept	kept	kept
algn-14	40	4	1	kept	kept	kept	kept
algn-2	17	7	2	kept	kept	removed	kept
alh-1	30	2	3	kept	kept	removed	kept
alh-10	67	2	3	removed	kept	removed	kept
alh-11	27	4	10	kept	kept	kept	kept
alh-12	32	8	11	kept	kept	kept	kept
alh-12	33	1	1	kept	removed	kept	kept
alh-13	70	4	10	removed	kept	kept	kept
alh-2	51	3	5	kept	kept	kept	kept
alh-3	46	2	6	kept	kept	kept	kept
alh-4	53	6	9	kept	removed	kept	kept
alh-5	51	4	2	kept	kept	kept	kept
alh-6	15	6	7	kept	kept	removed	kept
alh-6	15	6	8	kept	removed	kept	kept
alh-7	25	4	10	kept	kept	removed	kept
alh-8	24	6	3	kept	kept	kept	kept
alh-9	31	1	9	kept	kept	kept	kept
alkb-8	28	3	7	kept	kept	kept	kept
alp-1	43	7	9	kept	kept	kept	kept
alx-1	35	6	6	kept	kept	kept	kept
aly-1	44	1	7	kept	kept	kept	kept
aly-2	44	2	2	kept	kept	kept	removed
aly-3	47	4	6	kept	kept	kept	kept
ama-1	40	5	7	removed	removed	removed	removed
aman-1	65	4	7	kept	kept	removed	kept
aman-3	3	6	8	kept	kept	kept	kept
ampd-1	17	6	3	kept	kept	removed	kept
amph-1	44	6	2	kept	kept	kept	removed
amx-1	28	4	4	kept	kept	kept	kept
amx-3	62	6	10	kept	kept	kept	kept
anc-1	2	6	6	kept	kept	kept	kept
anc-1	2	6	7	kept	kept	kept	kept
anc-1	2	6	11	kept	kept	kept	kept
anc-1	2	7	1	kept	kept	removed	kept
anc-1	2	7	2	kept	kept	removed	kept
anc-1	2	7	3	kept	kept	kept	kept
anc-1	2	7	4	kept	kept	removed	kept
ani-1	37	4	5	removed	kept	kept	kept
ani-2	18	8	4	kept	kept	kept	kept
ani-3	62	3	9	kept	removed	kept	kept
anmt-2	31	4	10	kept	kept	kept	kept
anmt-3	56	3	3	kept	kept	kept	kept
ant-1.1	38	1	1	kept	kept	kept	kept
ant-1.2	5	5	5	kept	kept	kept	kept
ant-1.3	44	6	8	kept	kept	kept	kept
ant-1.4	43	4	9	kept	kept	kept	kept
apa-2	68	4	8	removed	kept	kept	kept
apb-1	38	8	4	kept	removed	removed	removed
apb-3	6	8	3	kept	kept	kept	kept
apc-10	56	7	4	kept	kept	kept	kept
apc-2	33	6	8	kept	kept	kept	kept
apd-3	16	5	7	kept	kept	kept	kept
ape-1	57	7	8	kept	kept	kept	kept
apg-1	12	7	7	kept	kept	removed	kept
aph-1	8	4	6	kept	kept	kept	kept
aph-2	9	7	6	kept	kept	kept	kept
apl-1	65	6	11	removed	kept	removed	removed
apm-1	3	7	1	removed	kept	removed	kept
apm-3	63	4	4	kept	kept	removed	kept
app-1	3	3	6	kept	kept	kept	kept
apr-1	7	2	1	removed	kept	kept	kept
aps-1	53	4	7	kept	removed	kept	removed
aps-2	65	2	9	kept	kept	kept	kept
aps-3	14	1	5	kept	kept	removed	kept
aptf-1	18	8	9	kept	kept	kept	kept
apy-1	67	4	8	removed	kept	removed	kept
aqp-1	19	8	6	kept	kept	kept	kept
aqp-10	22	5	11	kept	kept	kept	kept
aqp-3	46	1	8	kept	kept	kept	kept
aqp-4	56	2	4	kept	kept	kept	kept
aqp-5	56	7	11	kept	kept	kept	kept
aqp-6	56	8	11	kept	kept	kept	kept
aqp-8	65	4	5	kept	kept	kept	kept
arch-1	10	2	8	kept	kept	removed	kept
ard-1	46	3	7	kept	kept	kept	kept
arf-1.2	30	7	11	kept	kept	kept	removed
arf-3	43	1	1	kept	kept	kept	removed
arf-6	49	3	8	kept	kept	kept	kept
ari-1	4	6	5	kept	kept	kept	kept
arid-1	50	7	6	kept	kept	kept	kept
arl-1	21	4	2	kept	kept	kept	kept
arl-3	26	3	10	kept	kept	removed	kept
arl-5	35	5	7	kept	kept	kept	kept
arl-6	29	6	7	kept	kept	kept	kept
arp-1	26	5	11	kept	kept	kept	kept
arp-11	42	8	6	kept	kept	kept	removed
arp-6	20	6	1	kept	kept	removed	kept
arr-1	63	4	5	kept	kept	kept	kept
arrd-11	25	6	5	kept	kept	kept	kept
arrd-13	25	6	6	kept	kept	kept	kept
arrd-16	37	4	8	removed	kept	kept	kept
arrd-18	52	1	6	kept	kept	kept	kept
arrd-20	52	1	8	kept	kept	kept	kept
arrd-21	52	1	9	kept	kept	kept	kept
arrd-22	52	1	10	kept	kept	kept	kept
arrd-24	71	2	1	kept	removed	kept	kept
arrd-5	22	6	9	kept	kept	kept	kept
arrd-6	23	8	7	kept	kept	kept	kept
arrd-7	24	8	4	kept	kept	kept	kept
arrd-8	24	8	5	kept	kept	kept	kept
art-1	19	4	8	kept	kept	kept	kept
arx-2	56	6	8	kept	kept	kept	removed
arx-3	37	3	5	removed	kept	kept	kept
arx-5	37	5	7	removed	kept	kept	kept
arx-6	29	6	10	removed	kept	removed	removed
arx-7	1	6	8	kept	kept	kept	kept
asah-1	11	3	10	kept	kept	removed	kept
asb-1	29	4	5	kept	kept	kept	kept
asb-2	65	2	7	kept	kept	removed	removed
asc-1	26	5	9	kept	kept	kept	kept
asd-1	28	8	3	kept	kept	kept	kept
asd-2	5	6	8	kept	kept	kept	kept
asfl-1	9	1	7	kept	kept	removed	kept
asg-1	7	7	6	removed	kept	kept	kept
asg-2	67	1	2	kept	kept	removed	removed
asic-1	2	1	4	kept	kept	kept	kept
asic-2	6	4	9	kept	kept	kept	kept
asm-3	39	4	6	kept	kept	kept	kept
asns-1	55	3	3	kept	empty	kept	removed
asns-2	68	1	9	removed	kept	kept	kept
asp-1	62	2	2	kept	removed	kept	kept
asp-10	58	8	10	kept	kept	kept	kept
asp-11	54	8	7	kept	kept	kept	kept
asp-12	54	8	9	kept	kept	kept	kept
asp-13	55	4	1	kept	kept	kept	kept
asp-14	66	6	8	kept	kept	kept	kept
asp-15	62	2	4	kept	kept	kept	kept
asp-17	62	2	5	kept	kept	kept	kept
asp-18	62	1	2	kept	kept	kept	kept
asp-2	55	6	5	kept	removed	kept	kept
asp-3	66	8	9	kept	kept	kept	kept
asp-4	70	6	9	kept	kept	kept	kept
asp-5	54	8	8	kept	kept	kept	kept
asp-6	54	8	10	kept	kept	kept	kept
asp-7	51	8	8	kept	kept	kept	kept
asp-8	51	8	9	kept	kept	kept	kept
asp-9	41	6	4	kept	removed	kept	kept
aspm-1	8	4	4	kept	kept	removed	kept
atad-3	23	2	3	kept	kept	removed	kept
atat-2	66	3	2	kept	kept	kept	kept
atf-2	21	6	6	kept	kept	kept	kept
atf-6	70	3	11	removed	kept	kept	kept
atg-10	21	5	1	kept	kept	kept	kept
atg-13	33	7	5	kept	kept	kept	kept
atg-16.1	65	2	10	kept	kept	kept	kept
atg-16.2	18	8	10	kept	kept	kept	kept
atg-18	55	3	10	kept	removed	kept	kept
atg-3	50	3	4	kept	kept	kept	kept
atg-7	46	2	10	kept	kept	kept	kept
atg-9	50	8	3	kept	kept	kept	kept
atgl-1	31	7	10	kept	kept	kept	kept
atgp-1	49	5	5	kept	kept	kept	kept
ath-1	7	1	10	kept	kept	kept	kept
athp-2	16	7	8	kept	kept	removed	kept
atic-1	42	8	5	kept	kept	kept	removed
atl-1	56	1	5	kept	kept	kept	kept
atm-1	1	1	1	kept	removed	kept	kept
atm-1	13	8	4	kept	kept	kept	kept
atn-1	58	7	3	kept	kept	kept	kept
atp-2	30	4	3	kept	kept	removed	kept
atp-3	3	7	9	removed	kept	removed	removed
atp-5	57	4	7	kept	kept	removed	removed
attf-6	11	5	10	kept	kept	removed	kept
atx-2	36	2	2	kept	kept	kept	kept
avr-14	4	5	7	kept	kept	kept	kept
avr-15	59	5	7	kept	kept	kept	removed
B0001.4	47	4	8	kept	kept	kept	kept
B0024.10	56	6	3	kept	kept	kept	kept
B0024.11	56	6	4	kept	kept	kept	kept
B0024.13	56	6	6	kept	kept	kept	kept
B0024.3	56	5	11	kept	kept	kept	kept
B0035.1	46	5	5	kept	kept	kept	kept
B0035.3	46	5	7	kept	kept	kept	kept
B0041.5	3	1	5	kept	kept	kept	kept
B0205.4	10	3	11	kept	kept	removed	kept
B0207.6	4	5	6	kept	kept	kept	kept
B0218.5	43	1	11	kept	kept	kept	kept
B0228.7	20	3	9	kept	kept	kept	kept
B0238.9	52	7	11	kept	kept	kept	kept
B0261.1	3	5	11	removed	kept	kept	kept
B0272.3	68	5	3	removed	kept	kept	kept
B0272.4	68	5	4	removed	kept	kept	kept
B0280.9	32	5	4	kept	kept	kept	kept
B0281.3	15	8	8	kept	kept	kept	kept
B0281.4	15	8	9	kept	kept	kept	kept
B0281.5	15	8	10	kept	kept	kept	kept
B0281.6	15	8	11	kept	kept	kept	kept
B0281.8	16	1	1	kept	kept	kept	kept
B0285.4	29	1	8	kept	kept	kept	kept
B0285.6	29	1	10	kept	kept	kept	kept
B0303.11	34	3	8	kept	kept	kept	kept
B0334.3	24	3	11	kept	kept	kept	kept
B0334.4	24	4	1	kept	kept	kept	kept
B0334.5	24	4	2	kept	kept	removed	kept
B0336.3	30	8	1	kept	kept	kept	kept
B0336.5	30	8	3	kept	kept	kept	kept
B0361.2	32	7	6	kept	kept	kept	kept
B0361.6	32	7	8	kept	kept	kept	kept
B0393.5	29	6	3	kept	kept	kept	kept
B0395.3	72	3	3	kept	kept	kept	kept
B0416.5	68	4	5	removed	kept	kept	kept
B0432.9	15	1	5	kept	kept	removed	kept
B0454.6	16	3	3	kept	kept	kept	kept
B0464.6	35	1	9	kept	kept	kept	kept
B0464.7	35	1	10	kept	kept	kept	kept
B0491.1	24	2	5	kept	kept	removed	kept
B0491.7	24	2	8	kept	kept	kept	kept
B0495.2	20	3	3	kept	kept	kept	kept
B0495.5	20	3	5	kept	kept	kept	kept
B0495.7	20	3	6	kept	kept	kept	kept
B0495.8	20	3	7	kept	kept	kept	kept
B0507.2	55	4	4	kept	kept	kept	removed
B0511.12	10	3	4	kept	kept	removed	kept
B0511.6	10	3	1	kept	kept	kept	kept
B0511.7	10	3	2	kept	kept	kept	kept
B0513.2	48	6	3	kept	kept	kept	kept
B0513.5	48	6	5	kept	kept	kept	kept
B0524.2	27	7	3	kept	kept	kept	kept
B0546.4	40	2	5	kept	kept	kept	kept
B0554.5	50	8	7	kept	kept	kept	kept
B0554.7	50	8	9	kept	removed	kept	kept
B0564.2	48	2	8	kept	kept	kept	kept
bag-1	5	4	2	kept	kept	kept	kept
bar-1	67	2	5	removed	kept	kept	kept
bath-43	35	7	1	kept	kept	kept	kept
bath-44	44	2	5	kept	kept	kept	kept
baz-2	33	2	10	kept	kept	kept	kept
bbs-2	42	8	10	kept	kept	kept	kept
bbs-5	35	8	7	kept	kept	kept	kept
bbs-8	54	1	2	kept	kept	kept	kept
bbs-9	5	6	11	kept	kept	kept	kept
bcat-1	70	5	4	kept	kept	kept	kept
bcc-1	46	2	9	kept	kept	kept	kept
bcc-1	46	2	11	kept	kept	kept	kept
bcl-11	53	6	3	kept	kept	kept	kept
bcmo-1	26	8	5	kept	kept	kept	kept
bcmo-2	16	6	1	empty	kept	removed	kept
bcs-1	21	3	10	kept	kept	kept	kept
bec-1	41	4	4	kept	removed	kept	kept
ben-1	28	2	6	kept	kept	kept	kept
best-1	48	2	9	kept	kept	kept	kept
best-10	12	6	5	kept	kept	kept	kept
best-11	12	6	6	kept	kept	removed	kept
best-12	61	2	2	kept	kept	kept	kept
best-13	44	8	3	kept	kept	kept	kept
best-15	45	8	7	kept	kept	kept	kept
best-17	27	3	6	kept	kept	kept	kept
best-18	35	8	1	kept	kept	kept	kept
best-2	48	2	10	kept	kept	kept	kept
best-20	49	7	10	kept	kept	kept	kept
best-21	49	1	10	kept	kept	kept	kept
best-22	47	6	1	kept	kept	kept	kept
best-23	20	5	4	kept	kept	removed	kept
best-24	33	4	6	kept	kept	kept	kept
best-26	12	6	4	kept	kept	kept	kept
best-3	14	7	1	kept	kept	kept	kept
best-4	14	7	3	kept	kept	kept	kept
best-5	35	3	11	kept	kept	kept	kept
best-7	46	4	11	kept	kept	kept	kept
best-8	12	6	2	kept	kept	kept	kept
bgal-1	57	4	11	kept	removed	kept	kept
bgal-2	66	8	10	removed	kept	kept	kept
bgnt-1.2	51	5	2	kept	kept	kept	kept
bgnt-1.3	61	2	11	kept	kept	kept	kept
bgnt-1.6	11	1	3	kept	kept	kept	kept
bgnt-1.8	11	2	11	kept	kept	removed	kept
bicd-1	41	7	4	kept	removed	kept	kept
bir-1	57	7	9	kept	kept	kept	kept
bir-2	59	6	2	kept	kept	kept	kept
bli-1	23	5	1	kept	kept	kept	kept
bli-2	18	2	4	kept	kept	kept	kept
bli-3	1	1	2	removed	removed	removed	removed
bli-4	5	1	5	kept	kept	kept	kept
blmp-1	9	8	2	kept	kept	kept	kept
bmk-1	60	2	5	kept	kept	kept	kept
bra-1	70	8	11	kept	kept	kept	kept
bra-2	27	6	4	kept	kept	kept	kept
brd-1	32	3	3	kept	kept	kept	kept
bre-1	44	1	1	kept	kept	kept	removed
brf-1	19	8	11	removed	kept	kept	kept
bris-1	40	4	2	kept	kept	kept	kept
btbd-10	17	3	4	kept	kept	kept	kept
btf-1	25	4	2	kept	kept	kept	kept
bub-1	6	2	10	kept	kept	kept	kept
bub-3	25	6	4	kept	kept	kept	kept
bus-18	57	8	7	kept	kept	kept	kept
bus-4	40	7	10	kept	kept	kept	kept
bus-8	66	1	3	kept	kept	kept	kept
byn-1	32	3	8	kept	kept	kept	kept
C01A2.4	12	1	8	kept	kept	kept	kept
C01B10.3	41	7	11	kept	removed	kept	kept
C01B10.8	41	8	1	kept	kept	kept	kept
C01B10.9	41	8	2	kept	kept	kept	kept
C01B4.6	51	6	6	kept	kept	kept	kept
C01C4.3	64	7	7	kept	kept	kept	kept
C01F1.1	16	7	1	kept	kept	removed	kept
C01F1.3	16	7	3	kept	kept	kept	kept
C01F1.6	16	7	4	kept	kept	kept	kept
C01F6.9	44	1	10	kept	kept	kept	kept
C01G10.10	60	6	4	kept	kept	kept	kept
C01G10.7	60	6	1	kept	kept	kept	kept
C01G10.8	60	6	2	kept	kept	kept	kept
C01G10.9	60	6	3	kept	kept	kept	kept
C01G12.5	26	3	8	kept	kept	kept	kept
C01G5.5	41	7	1	kept	kept	kept	kept
C01G6.4	22	2	5	kept	removed	kept	kept
C01H6.4	6	2	1	kept	kept	kept	kept
C02B10.5	41	1	11	kept	removed	kept	kept
C02C2.6	33	4	5	kept	kept	kept	kept
C02D5.2	34	2	9	kept	kept	kept	kept
C02F5.3	33	7	11	kept	kept	kept	kept
C02G6.1	53	3	9	kept	kept	kept	kept
C02G6.2	53	3	10	kept	kept	kept	kept
C02H6.1	54	4	10	kept	kept	kept	kept
C03A3.2	69	5	11	kept	kept	kept	kept
C03A3.3	69	6	1	kept	removed	kept	kept
C03F11.2	65	8	10	removed	kept	removed	kept
C03H12.1	72	2	2	kept	kept	kept	kept
C03H5.4	15	2	2	kept	kept	kept	kept
C04F12.8	9	1	11	kept	removed	kept	kept
C04G6.4	45	2	6	kept	kept	kept	kept
C04G6.7	45	2	7	kept	kept	kept	kept
C04H5.1	45	2	8	kept	kept	kept	kept
C05C10.3	22	7	7	kept	kept	kept	kept
C05C8.1	54	3	11	kept	kept	kept	kept
C05C8.2	54	4	1	kept	kept	kept	kept
C05C8.5	54	4	3	kept	kept	kept	kept
C05C8.7	54	4	5	removed	removed	removed	removed
C05D10.2	31	4	1	kept	kept	kept	kept
C05D11.5	31	7	8	kept	kept	kept	kept
C05D11.8	31	7	11	kept	removed	kept	kept
C05D11.9	31	8	1	kept	kept	kept	kept
C05D12.1	24	2	11	kept	kept	kept	kept
C05D2.6	30	7	5	kept	kept	kept	kept
C05D9.3	63	5	9	kept	kept	removed	kept
C05G5.1	71	5	5	removed	removed	kept	kept
C05G5.5	71	5	7	kept	removed	removed	kept
C05G5.6	71	5	8	removed	kept	removed	kept
C06A1.6	23	3	9	kept	kept	removed	kept
C06A12.3	49	6	9	kept	kept	kept	kept
C06A5.3	4	5	9	kept	kept	kept	kept
C06A6.4	42	7	10	kept	kept	kept	removed
C06A6.5	42	7	11	kept	kept	kept	removed
C06A8.6	20	4	1	kept	kept	kept	kept
C06E4.3	42	3	1	kept	kept	kept	kept
C06E4.6	42	3	2	kept	kept	kept	kept
C06G1.5	72	5	2	kept	kept	kept	kept
C06G3.5	42	1	8	kept	kept	kept	kept
C06G3.8	42	1	9	kept	kept	kept	kept
C06G8.3	45	8	6	kept	kept	kept	kept
C06H2.2	57	4	8	kept	kept	kept	empty
C07A12.7	65	3	5	kept	kept	kept	kept
C07A4.3	68	8	8	removed	kept	kept	kept
C07A9.2	35	3	8	kept	kept	kept	kept
C07B5.4	68	5	7	removed	kept	kept	kept
C07D8.5	67	3	4	removed	kept	kept	kept
C07D8.6	67	3	5	removed	kept	kept	kept
C07E3.9	23	2	8	kept	kept	removed	kept
C07H6.2	33	1	7	kept	kept	kept	kept
C07H6.4	33	1	9	kept	kept	kept	kept
C08B11.8	20	6	3	kept	kept	kept	kept
C08B11.9	20	6	4	kept	kept	kept	kept
C08B6.8	56	4	6	kept	kept	kept	kept
C08D8.1	55	1	1	kept	removed	kept	kept
C08E8.2	61	8	3	kept	kept	kept	kept
C08F8.2	46	4	1	kept	kept	kept	kept
C08F8.6	46	4	3	kept	kept	kept	kept
C08H9.1	22	6	11	kept	kept	kept	kept
C08H9.3	22	7	2	kept	kept	kept	kept
C09B8.4	66	4	1	kept	kept	kept	kept
C09B9.3	41	1	8	kept	removed	kept	kept
C09D4.1	3	8	2	kept	kept	removed	kept
C09D4.4	3	8	3	kept	kept	kept	kept
C09E9.1	39	6	1	kept	kept	removed	kept
C09F5.3	27	4	2	kept	kept	kept	kept
C10A4.1	67	3	6	removed	kept	removed	kept
C10C5.3	44	4	1	kept	kept	kept	kept
C10C5.4	44	4	2	kept	kept	kept	kept
C10C5.5	44	4	3	kept	kept	kept	kept
C10E2.2	72	5	4	kept	kept	kept	kept
C10H11.8	3	2	2	kept	kept	kept	kept
C11D2.4	41	6	5	kept	removed	removed	kept
C11E4.6	68	6	1	removed	kept	kept	kept
C11H1.2	71	3	5	kept	kept	kept	kept
C11H1.3	71	3	6	kept	removed	kept	kept
C11H1.7	71	3	8	removed	removed	removed	kept
C12D8.1	56	5	4	kept	kept	kept	kept
C13B4.1	26	2	11	kept	kept	kept	kept
C13B9.2	32	1	11	kept	kept	kept	kept
C13F10.5	54	3	9	kept	kept	kept	kept
C13F10.7	54	3	10	kept	kept	kept	kept
C14A4.3	23	3	11	kept	kept	kept	kept
C14B9.2	33	6	10	kept	kept	kept	kept
C14B9.8	33	7	3	kept	kept	kept	kept
C14C10.1	58	7	10	kept	kept	kept	kept
C14C10.5	58	8	1	kept	kept	kept	kept
C14H10.1	69	1	1	kept	kept	kept	kept
C14H10.3	69	1	2	kept	kept	kept	kept
C15A7.2	70	1	8	kept	kept	kept	kept
C15B12.1	66	6	11	kept	kept	kept	kept
C15C6.3	10	8	8	kept	kept	removed	kept
C15C6.4	10	8	9	kept	kept	kept	kept
C15C7.1	64	5	2	kept	kept	kept	kept
C15C8.4	58	8	11	kept	kept	kept	kept
C15H9.4	66	4	9	kept	kept	kept	kept
C15H9.5	66	4	10	removed	kept	kept	kept
C16A11.2	16	6	11	kept	kept	kept	kept
C16A3.10	31	7	4	kept	kept	kept	kept
C16A3.2	31	6	7	kept	kept	kept	kept
C16A3.4	31	6	9	empty	kept	kept	kept
C16A3.5	31	6	10	kept	kept	kept	kept
C16A3.6	31	6	11	kept	kept	kept	kept
C16C10.1	28	7	1	kept	kept	kept	kept
C16C10.2	28	7	2	kept	kept	kept	kept
C16C10.4	28	7	3	kept	kept	removed	kept
C16C10.8	28	7	7	kept	kept	kept	kept
C16C2.4	9	2	6	removed	kept	kept	kept
C16C8.18	16	5	2	removed	kept	removed	kept
C16D9.6	54	8	6	kept	kept	kept	kept
C16E9.1	67	1	6	kept	kept	kept	kept
C16E9.2	67	1	7	kept	kept	removed	kept
C17A2.3	16	5	11	kept	kept	removed	kept
C17C3.1	18	1	4	kept	kept	kept	kept
C17C3.3	18	1	5	kept	kept	kept	kept
C17E4.6	8	6	5	kept	kept	kept	kept
C17G10.1	18	1	6	removed	kept	kept	kept
C17G10.2	18	1	7	kept	kept	kept	kept
C17G10.8	18	1	9	kept	kept	kept	kept
C17H11.6	67	7	8	removed	kept	kept	kept
C17H12.2	41	8	5	kept	removed	kept	kept
C18A3.1	18	2	11	kept	kept	kept	kept
C18A3.3	18	3	1	kept	kept	kept	kept
C18B12.4	71	7	4	kept	removed	kept	kept
C18B12.6	71	7	5	removed	kept	removed	kept
C18E3.5	2	5	4	kept	kept	removed	kept
C18E9.2	21	8	1	kept	kept	kept	kept
C18E9.4	21	8	2	kept	kept	kept	kept
C18F10.7	31	5	11	kept	kept	kept	kept
C18H7.1	39	4	9	kept	kept	kept	kept
C18H7.4	39	4	10	kept	kept	removed	kept
C18H9.3	19	2	6	kept	kept	removed	kept
C23G10.2	31	5	1	kept	kept	kept	kept
C23G10.6	31	5	4	kept	kept	kept	kept
C23G10.7	31	5	5	kept	kept	kept	kept
C23H3.3	14	7	8	kept	kept	kept	kept
C23H3.9	14	7	11	kept	kept	kept	kept
C23H4.6	70	2	10	kept	kept	kept	kept
C24A1.3	27	4	6	kept	kept	kept	kept
C24A11.9	3	7	5	removed	kept	removed	kept
C24A3.1	68	3	2	removed	kept	kept	kept
C24A3.4	68	3	3	removed	kept	kept	kept
C24B5.4	55	6	4	kept	kept	kept	removed
C24D10.6	41	2	3	kept	removed	kept	kept
C24F3.2	45	4	5	kept	kept	kept	kept
C24G6.8	53	1	2	kept	kept	kept	kept
C24H11.5	37	1	6	kept	kept	kept	kept
C24H12.4	15	2	3	kept	kept	kept	kept
C24H12.5	15	2	4	kept	kept	removed	kept
C25A1.1	9	5	11	kept	kept	removed	kept
C25A1.4	9	6	2	kept	kept	kept	kept
C25A1.5	9	6	3	kept	kept	kept	kept
C25E10.4	55	5	2	kept	removed	kept	removed
C25E10.5	55	5	3	kept	kept	kept	removed
C25G4.2	47	6	11	kept	kept	kept	kept
C25H3.3	18	2	6	kept	kept	kept	kept
C25H3.4	18	2	7	kept	kept	kept	kept
C25H3.7	18	2	8	kept	kept	kept	kept
C25H3.8	18	2	9	kept	kept	kept	kept
C25H3.9	18	2	10	kept	kept	kept	kept
C26B9.5	65	8	3	kept	kept	kept	kept
C26B9.6	65	8	4	kept	kept	kept	kept
C26C6.6	6	5	2	kept	kept	removed	kept
C26D10.3	21	1	6	kept	kept	kept	kept
C26D10.4	21	1	7	kept	kept	kept	kept
C27A12.6	4	6	3	kept	kept	kept	kept
C27A12.7	4	6	4	kept	kept	kept	kept
C27A12.9	4	6	6	kept	kept	kept	kept
C27A2.4	17	5	7	kept	kept	removed	kept
C27A2.5	17	5	8	kept	kept	removed	kept
C27A7.1	58	3	11	kept	kept	kept	kept
C27A7.3	58	4	1	kept	kept	kept	kept
C27A7.5	58	4	3	kept	kept	kept	kept
C27B7.2	43	8	1	kept	kept	kept	kept
C27B7.7	43	8	3	kept	kept	kept	kept
C27C12.4	71	6	2	removed	kept	kept	kept
C27D6.1	17	5	11	kept	kept	kept	kept
C27F2.1	29	8	9	kept	kept	kept	kept
C27F2.4	29	8	11	kept	kept	kept	kept
C27F2.7	30	1	2	kept	kept	kept	kept
C27F2.8	30	1	3	kept	kept	kept	kept
C27H2.2	48	6	8	kept	kept	kept	kept
C27H5.4	19	7	5	kept	kept	kept	kept
C28F5.4	20	2	1	kept	kept	kept	kept
C28H8.3	31	2	5	kept	kept	kept	kept
C28H8.4	31	2	6	kept	kept	kept	kept
C28H8.5	31	2	7	kept	kept	kept	kept
C29E4.3	33	5	1	kept	kept	kept	removed
C29E6.6	47	2	9	kept	kept	kept	kept
C29F7.3	70	7	11	removed	kept	kept	kept
C29H12.2	18	6	1	kept	kept	kept	kept
C30A5.3	33	7	9	kept	kept	kept	kept
C30B5.2	18	6	4	kept	kept	kept	kept
C30B5.4	18	6	6	kept	kept	kept	kept
C30B5.6	18	6	7	removed	kept	kept	kept
C30F12.1	5	7	4	kept	kept	removed	kept
C30F12.2	5	7	5	kept	kept	kept	kept
C30H6.7	49	6	5	kept	kept	kept	kept
C30H6.8	49	6	6	kept	kept	kept	kept
C30H7.2	3	7	6	removed	kept	kept	kept
C31A11.2	61	3	2	kept	kept	kept	kept
C31C9.2	25	6	1	kept	kept	removed	kept
C31E10.5	71	2	2	kept	kept	kept	kept
C31E10.6	71	2	3	kept	removed	kept	kept
C31H1.3	41	4	7	kept	removed	kept	kept
C31H2.4	65	7	2	kept	kept	kept	kept
C32B5.13	15	5	8	removed	kept	removed	kept
C32B5.7	15	5	7	removed	kept	kept	kept
C32C4.1	56	8	10	kept	kept	kept	kept
C32D5.3	18	7	6	kept	kept	kept	kept
C32D5.6	18	7	8	kept	kept	kept	kept
C32D5.8	18	7	9	kept	kept	kept	kept
C32E12.1	3	5	9	kept	kept	kept	kept
C32E8.5	2	1	7	kept	kept	kept	kept
C32E8.9	2	1	10	kept	kept	kept	kept
C32F10.8	4	4	6	kept	kept	kept	kept
C33A11.2	71	8	5	removed	kept	kept	kept
C33A12.1	44	4	11	kept	kept	kept	removed
C33A12.3	44	5	1	kept	kept	kept	removed
C33E10.10	72	6	11	kept	kept	kept	kept
C33E10.6	72	6	10	kept	kept	kept	kept
C33F10.12	17	2	8	kept	kept	removed	kept
C33F10.3	17	2	6	kept	kept	removed	kept
C33G3.4	71	2	6	removed	removed	removed	kept
C33H5.8	42	7	2	kept	kept	kept	kept
C34B2.10	10	3	9	kept	kept	kept	kept
C34B2.4	10	3	5	kept	kept	removed	kept
C34B2.6	10	3	6	kept	kept	kept	kept
C34B2.8	10	3	8	kept	kept	kept	kept
C34B7.2	7	4	1	kept	kept	kept	kept
C34C12.4	28	1	9	kept	kept	kept	kept
C34C12.8	28	1	10	kept	kept	kept	kept
C34C6.2	21	5	6	removed	kept	removed	kept
C34C6.4	21	5	7	removed	kept	kept	kept
C34D10.1	67	6	11	removed	kept	kept	kept
C34D10.2	67	7	1	removed	kept	kept	kept
C34D4.1	42	2	2	kept	kept	kept	kept
C34D4.4	42	2	3	kept	kept	kept	kept
C34F6.10	69	5	10	kept	kept	kept	kept
C35B8.3	68	4	1	removed	kept	kept	kept
C35C5.3	69	7	8	kept	kept	kept	kept
C35D10.10	29	7	4	kept	kept	kept	kept
C35D10.12	29	7	5	kept	kept	kept	kept
C35D10.5	29	7	2	kept	kept	kept	kept
C35D10.6	29	7	3	kept	kept	kept	kept
C36A4.4	28	4	8	kept	kept	kept	kept
C36B7.6	67	1	11	kept	kept	removed	kept
C36E8.1	28	5	7	kept	kept	kept	kept
C36E8.4	28	5	9	kept	kept	kept	kept
C37A2.6	5	5	10	kept	kept	kept	kept
C37A2.7	5	5	11	kept	kept	kept	kept
C37C3.2	54	6	5	kept	kept	removed	kept
C37C3.7	54	6	8	kept	kept	kept	kept
C37H5.13	52	6	6	kept	kept	kept	kept
C37H5.5	52	6	3	kept	kept	kept	kept
C38D4.9	29	6	8	kept	kept	kept	kept
C38H2.2	36	1	6	kept	kept	kept	kept
C39E9.11	48	2	4	kept	kept	kept	removed
C39F7.5	51	2	4	kept	kept	kept	kept
C40A11.2	15	7	10	kept	kept	kept	kept
C40A11.4	15	7	11	kept	kept	removed	kept
C40A11.6	15	8	1	kept	kept	kept	kept
C40A11.7	15	8	2	kept	kept	kept	kept
C41A3.1	66	1	1	kept	kept	kept	kept
C41D11.3	2	7	9	kept	kept	removed	kept
C42C1.11	47	5	9	kept	kept	kept	kept
C42C1.2	47	5	2	kept	kept	kept	kept
C42C1.4	47	5	4	kept	kept	kept	kept
C42C1.8	47	5	6	kept	kept	kept	kept
C43E11.9	2	6	1	kept	kept	kept	kept
C43H6.3	64	1	6	kept	kept	kept	kept
C44B11.1	27	8	6	kept	kept	kept	kept
C44B12.3	39	5	9	kept	kept	kept	kept
C44B7.10	19	4	3	kept	kept	kept	kept
C44B7.11	19	4	4	kept	kept	kept	kept
C44B7.7	19	4	1	kept	kept	removed	kept
C44C8.5	39	5	7	kept	kept	removed	kept
C44E4.4	2	8	11	kept	kept	kept	kept
C44E4.5	3	1	1	kept	kept	kept	kept
C44H4.4	71	4	7	removed	removed	kept	kept
C45B11.2	57	3	9	kept	kept	kept	kept
C45B2.6	66	4	6	kept	kept	kept	kept
C45G3.3	8	4	5	kept	kept	kept	kept
C45G9.2	30	1	10	kept	kept	kept	kept
C45G9.7	30	1	11	kept	kept	kept	kept
C46A5.1	42	6	7	kept	kept	kept	kept
C46C11.2	65	3	9	kept	kept	removed	kept
C46F11.4	28	3	2	kept	kept	kept	kept
C46G7.1	41	5	7	kept	removed	kept	kept
C46H11.2	3	3	10	kept	kept	removed	kept
C46H11.3	3	3	11	removed	kept	kept	kept
C46H3.3	63	6	2	kept	kept	kept	kept
C47A4.1	48	5	7	kept	kept	kept	kept
C47B2.2	11	7	4	kept	kept	kept	kept
C47D12.2	24	5	7	kept	kept	kept	kept
C47E12.2	44	8	8	kept	kept	kept	kept
C47E12.3	44	8	9	kept	kept	kept	kept
C47E12.7	45	1	1	kept	kept	kept	kept
C47E8.4	60	4	3	kept	kept	kept	kept
C47F8.3	11	1	5	kept	kept	removed	kept
C47F8.5	11	1	7	kept	kept	kept	kept
C47F8.6	11	1	8	kept	kept	kept	kept
C47G2.4	24	1	10	kept	kept	kept	kept
C48B6.2	5	6	9	kept	kept	kept	kept
C48E7.6	4	8	7	kept	kept	kept	kept
C49C8.5	43	5	9	kept	kept	kept	removed
C49H3.3	42	8	2	kept	kept	kept	kept
C49H3.6	42	8	4	kept	kept	kept	kept
C50B6.7	59	4	3	kept	kept	kept	kept
C50B6.9	59	4	4	kept	kept	kept	kept
C50B8.1	59	6	1	kept	kept	kept	kept
C50C3.5	33	7	6	kept	kept	kept	kept
C50D2.2	14	8	1	kept	kept	kept	kept
C50D2.5	14	8	3	kept	kept	kept	kept
C50D2.7	14	8	4	kept	kept	kept	kept
C50D2.8	14	8	5	kept	kept	kept	kept
C50F2.3	2	2	11	removed	kept	removed	removed
C50F4.12	55	8	9	kept	kept	kept	kept
C50F7.6	42	6	5	kept	kept	kept	kept
C51E3.6	56	4	7	kept	kept	kept	kept
C52B9.4	65	1	9	kept	kept	removed	kept
C52B9.8	65	2	1	kept	kept	kept	kept
C52G5.2	70	5	1	removed	kept	kept	kept
C53A3.2	53	3	2	kept	kept	kept	kept
C53A5.13	60	3	5	kept	kept	kept	kept
C53A5.2	60	3	1	kept	kept	kept	kept
C53B4.3	43	8	8	kept	kept	kept	kept
C53B4.4	43	8	9	kept	kept	kept	removed
C53D5.b	1	1	11	kept	kept	kept	kept
C53D6.7	44	1	3	kept	kept	kept	removed
C53H9.2	1	5	1	kept	kept	kept	kept
C54C8.3	11	3	1	removed	kept	kept	kept
C54D10.10	58	6	10	kept	kept	kept	kept
C54G4.4	7	1	4	kept	kept	removed	kept
C54G7.1	66	1	4	kept	kept	kept	kept
C55A6.1	57	6	9	kept	kept	kept	kept
C55B6.1	67	2	6	kept	kept	kept	kept
C55C3.1	41	4	5	removed	removed	kept	kept
C56A3.6	59	5	10	kept	kept	kept	kept
C56A3.8	59	5	11	kept	kept	kept	kept
C56C10.10	19	2	2	kept	kept	kept	kept
C56C10.7	19	1	10	kept	kept	kept	kept
C56C10.9	19	2	1	kept	removed	kept	kept
C56G2.15	31	6	5	kept	kept	kept	kept
cab-1	70	2	9	kept	kept	kept	kept
cacn-1	25	8	7	kept	kept	kept	kept
cah-1	30	2	4	kept	kept	removed	kept
cah-2	20	1	11	kept	kept	kept	kept
cah-3	72	4	9	kept	kept	kept	kept
cah-4	70	8	8	kept	kept	kept	kept
cal-8	17	8	10	kept	kept	kept	kept
calm-1	8	7	1	removed	kept	kept	kept
calu-1	65	6	1	kept	kept	kept	kept
cam-1	22	2	8	kept	kept	kept	kept
camt-1	16	8	10	kept	kept	kept	kept
cand-1	61	5	1	kept	kept	kept	kept
cap-1	42	2	11	kept	kept	kept	removed
cap-2	23	6	4	kept	kept	kept	kept
capg-2	58	5	4	kept	kept	kept	kept
car-1	11	6	7	removed	removed	kept	kept
cars-1	1	6	1	kept	kept	removed	removed
cas-1	72	5	11	kept	kept	kept	kept
cas-2	2	5	5	kept	kept	kept	kept
casy-1	18	5	3	kept	kept	removed	kept
cat-1	66	2	3	kept	kept	kept	kept
cat-2	15	1	4	kept	kept	kept	kept
cat-4	56	8	5	kept	kept	kept	kept
catp-2	52	7	5	kept	kept	kept	kept
catp-3	54	7	5	kept	kept	kept	kept
catp-4	26	3	9	kept	kept	kept	kept
catp-5	67	7	4	removed	kept	removed	kept
catp-6	44	7	5	kept	kept	kept	kept
catp-8	46	7	8	kept	kept	kept	kept
cav-1	44	7	2	kept	kept	kept	kept
cbl-1	8	5	5	kept	kept	removed	removed
cbp-1	35	4	7	kept	kept	kept	kept
cbs-2	26	6	9	kept	kept	kept	kept
cbs-2	26	6	10	kept	kept	kept	kept
CC8.a	40	3	7	kept	kept	kept	kept
CC8.c	40	3	8	kept	removed	kept	kept
cca-1	67	6	4	removed	kept	kept	kept
ccar-1	48	6	9	kept	kept	kept	kept
ccb-1	1	8	4	kept	kept	kept	kept
ccb-2	1	6	6	kept	kept	kept	kept
ccch-1	57	7	1	kept	kept	kept	kept
cccp-1	37	4	7	removed	kept	kept	kept
ccdc-149	69	7	6	kept	kept	removed	kept
ccdc-55	28	7	5	kept	kept	kept	kept
ccf-1	37	2	8	kept	kept	kept	kept
cchl-1	24	1	5	kept	kept	removed	kept
ccm-3	23	4	3	kept	kept	kept	kept
ccnk-1	60	3	10	kept	kept	kept	kept
cco-1	9	3	1	kept	kept	kept	kept
cco-2	37	6	2	removed	kept	kept	kept
ccpp-1	4	3	6	kept	kept	removed	kept
ccpp-6	17	7	11	kept	kept	kept	kept
ccr-4	47	6	3	kept	kept	kept	kept
cct-1	20	8	1	kept	kept	empty	kept
cct-2	21	7	11	kept	kept	kept	kept
cct-3	26	6	11	kept	kept	kept	kept
cct-4	21	1	2	kept	kept	kept	kept
cct-5	29	3	4	kept	kept	kept	kept
cct-6	31	1	11	kept	kept	kept	kept
cct-7	51	3	10	kept	kept	kept	kept
cct-8	50	4	4	kept	kept	kept	kept
cct-8	50	4	5	kept	kept	kept	kept
CD4.3	53	1	6	kept	kept	kept	kept
CD4.5	53	1	8	kept	kept	kept	kept
CD4.9	53	1	11	kept	kept	kept	kept
cdc-14	18	1	8	kept	kept	kept	kept
cdc-25.1	5	2	6	kept	kept	kept	kept
cdc-25.2	51	3	3	kept	kept	kept	kept
cdc-25.3	34	5	6	kept	kept	kept	kept
cdc-25.4	23	1	7	kept	kept	removed	kept
cdc-37	15	3	2	kept	kept	removed	kept
cdc-42	20	2	7	kept	kept	kept	kept
cdc-48.1	23	3	7	kept	kept	removed	kept
cdc-5L	7	5	3	kept	kept	removed	removed
cdc-6	2	6	2	kept	kept	kept	kept
cdc-7	4	5	4	kept	kept	kept	kept
cdd-2	42	5	4	kept	kept	kept	kept
cdf-1	66	7	1	kept	kept	kept	kept
cdf-2	70	3	9	kept	kept	kept	kept
cdgs-1	42	7	8	kept	kept	kept	kept
cdh-1	27	8	1	kept	kept	kept	kept
cdh-12	38	3	4	kept	kept	kept	kept
cdh-12	38	3	5	kept	kept	kept	kept
cdh-12	38	4	1	kept	kept	kept	kept
cdh-4	29	3	5	kept	kept	kept	kept
cdh-5	43	5	11	kept	removed	kept	kept
cdh-7	26	5	1	kept	kept	removed	kept
cdh-8	39	2	10	kept	kept	kept	kept
cdk-1	35	4	2	kept	kept	kept	kept
cdk-12	29	1	7	kept	kept	kept	kept
cdk-2	1	8	1	kept	kept	kept	kept
cdk-4	70	8	7	removed	kept	kept	kept
cdk-5	38	1	3	kept	kept	kept	kept
cdk-8	7	7	10	kept	kept	removed	kept
cdk-9	10	5	6	kept	kept	removed	kept
cdka-1	29	4	9	kept	kept	kept	kept
cdl-1	23	5	5	kept	kept	removed	kept
cdr-1	61	1	5	kept	kept	kept	kept
cdr-2	58	6	8	kept	kept	kept	kept
cdr-3	58	6	9	kept	kept	kept	kept
cdr-4	58	6	4	kept	kept	kept	kept
cdr-6	58	6	5	kept	kept	kept	kept
cdr-7	58	6	6	kept	kept	kept	kept
cdt-1	14	1	11	kept	kept	kept	kept
cdt-2	60	5	5	kept	kept	kept	kept
cebp-1	63	6	11	kept	kept	kept	kept
cec-1	34	1	10	kept	kept	kept	kept
cec-3	20	4	8	kept	kept	kept	kept
cec-8	38	6	11	kept	kept	kept	kept
ced-1	10	7	1	kept	kept	kept	kept
ced-10	40	2	10	kept	kept	kept	kept
ced-2	50	1	9	kept	kept	kept	kept
ced-2	50	1	10	removed	kept	kept	kept
ced-5	45	7	1	kept	kept	kept	kept
ced-6	30	7	3	kept	kept	removed	kept
ced-8	67	8	8	removed	kept	removed	kept
cee-1	29	7	7	kept	kept	kept	kept
ceeh-1	27	5	10	kept	kept	kept	kept
ceeh-2	56	6	10	kept	kept	kept	kept
ceh-10	30	8	10	kept	kept	removed	kept
ceh-13	33	2	4	kept	kept	kept	kept
ceh-14	67	4	3	removed	kept	kept	kept
ceh-16	34	3	2	kept	kept	kept	kept
ceh-17	2	8	3	kept	kept	kept	kept
ceh-18	64	8	1	kept	kept	kept	kept
ceh-2	4	6	2	kept	kept	kept	kept
ceh-20	32	3	11	kept	kept	kept	kept
ceh-22	57	1	5	kept	kept	kept	kept
ceh-23	33	3	11	kept	kept	kept	kept
ceh-24	59	7	9	kept	kept	kept	kept
ceh-28	70	6	2	kept	kept	kept	kept
ceh-31	64	3	11	kept	kept	kept	kept
ceh-32	57	7	11	kept	kept	kept	kept
ceh-33	52	8	3	kept	kept	kept	kept
ceh-36	71	2	11	kept	kept	kept	kept
ceh-37	71	3	1	kept	removed	kept	kept
ceh-40	70	3	2	removed	kept	kept	kept
ceh-43	29	2	11	kept	kept	kept	kept
ceh-45	1	3	10	kept	kept	kept	kept
ceh-45	1	3	11	kept	kept	kept	kept
ceh-48	41	8	6	kept	removed	kept	kept
ceh-5	9	2	3	kept	kept	kept	kept
ceh-51	62	1	5	kept	kept	kept	kept
ceh-53	40	2	9	kept	kept	removed	kept
ceh-54	66	5	7	kept	kept	kept	kept
ceh-6	7	5	4	kept	kept	removed	kept
ceh-60	66	7	3	kept	kept	kept	kept
ceh-7	21	5	10	removed	kept	kept	kept
ceh-8	7	3	1	removed	kept	kept	kept
ceh-82	15	7	5	kept	kept	kept	kept
cel-1	9	1	5	kept	kept	kept	kept
cept-1	70	4	9	removed	kept	kept	kept
cept-2	60	1	7	kept	kept	kept	kept
ces-1	7	6	11	kept	kept	kept	kept
ces-2	13	2	11	kept	kept	kept	kept
cey-1	23	7	8	kept	kept	kept	kept
cey-2	4	1	7	kept	kept	kept	kept
cey-3	4	1	3	kept	kept	kept	kept
cey-4	36	5	7	kept	kept	kept	kept
cfi-1	9	5	1	kept	kept	removed	kept
cfim-1	7	6	7	kept	kept	kept	kept
cfim-2	43	8	5	kept	kept	kept	kept
cfp-1	48	7	6	kept	kept	kept	kept
cft-1	53	1	3	kept	kept	kept	kept
cfz-2	52	2	2	kept	kept	kept	kept
cgef-1	64	3	2	kept	kept	empty	kept
cgh-1	33	1	10	kept	kept	kept	kept
cgp-1	50	7	3	kept	kept	kept	kept
cgr-1	64	7	2	kept	kept	kept	kept
cgt-1	61	1	3	kept	kept	kept	kept
cgt-2	72	8	3	kept	kept	kept	kept
cgt-3	18	4	7	kept	kept	kept	kept
chaf-2	14	6	7	kept	kept	kept	kept
chat-1	40	6	3	kept	kept	kept	kept
chc-1	35	7	10	removed	removed	kept	removed
chd-1	5	7	9	kept	kept	kept	kept
chd-3	70	5	2	kept	kept	kept	kept
che-1	5	3	3	removed	kept	kept	kept
che-10	17	1	5	kept	kept	kept	kept
che-11	58	4	2	kept	kept	kept	kept
che-12	56	6	1	kept	kept	kept	kept
che-13	10	1	4	removed	kept	kept	kept
che-14	4	3	4	kept	kept	kept	kept
che-2	63	2	1	kept	kept	kept	kept
che-3	7	2	2	kept	kept	kept	kept
che-6	40	1	2	kept	kept	kept	kept
chhy-1	21	4	8	removed	kept	kept	kept
chil-10	63	4	7	kept	kept	kept	kept
chil-14	51	2	10	kept	kept	kept	kept
chk-1	62	7	9	kept	removed	kept	kept
chk-1	62	7	11	kept	kept	kept	kept
chl-1	36	1	8	kept	kept	kept	kept
chn-1	4	7	7	kept	kept	removed	kept
cho-1	48	3	4	kept	kept	kept	kept
chp-1	3	4	7	kept	kept	kept	kept
chpf-1	56	4	11	kept	kept	kept	kept
chpf-2	51	8	10	kept	kept	removed	kept
cht-1	64	6	3	kept	kept	kept	kept
chtl-1	65	8	8	kept	kept	removed	kept
chup-1	68	1	10	removed	kept	kept	kept
chw-1	56	7	7	kept	kept	kept	kept
cic-1	27	7	7	kept	kept	kept	kept
cid-1	30	3	3	kept	kept	kept	kept
cids-1	33	8	1	kept	kept	kept	kept
cin-4	19	5	5	removed	kept	removed	kept
cir-1	4	2	6	kept	kept	kept	kept
cit-1.2	33	5	9	kept	kept	kept	kept
cka-1	44	6	9	kept	kept	kept	kept
cka-2	65	1	6	kept	kept	kept	kept
ckb-1	29	1	11	kept	kept	kept	kept
ckb-2	29	2	1	kept	kept	kept	kept
ckb-3	29	2	2	kept	kept	kept	kept
ckb-4	51	5	1	kept	kept	kept	kept
ckc-1	64	7	1	kept	kept	kept	kept
cki-2	20	4	3	kept	kept	kept	kept
ckk-1	30	7	6	kept	kept	kept	kept
ckr-1	5	4	11	kept	kept	kept	kept
ckr-2	27	7	6	kept	kept	kept	kept
cks-1	43	5	3	kept	kept	kept	removed
cku-70	36	7	5	kept	kept	kept	kept
cku-80	29	2	7	kept	kept	kept	kept
cle-1	7	8	1	kept	kept	removed	kept
clec-10	15	1	11	kept	kept	removed	kept
clec-11	11	3	3	kept	kept	kept	kept
clec-12	11	3	6	removed	kept	kept	kept
clec-13	11	4	9	kept	kept	kept	removed
clec-148	27	2	9	kept	kept	kept	kept
clec-149	27	5	9	kept	kept	kept	kept
clec-15	11	4	8	kept	kept	kept	removed
clec-161	35	3	3	kept	kept	kept	kept
clec-17	11	2	8	kept	kept	removed	kept
clec-18	11	1	4	kept	kept	kept	kept
clec-186	47	8	10	kept	kept	kept	kept
clec-187	47	8	9	kept	kept	kept	kept
clec-19	15	7	6	kept	kept	kept	kept
clec-196	49	5	7	kept	kept	kept	kept
clec-199	49	6	2	kept	kept	kept	kept
clec-2	16	3	4	removed	kept	removed	kept
clec-21	15	7	2	kept	kept	kept	kept
clec-210	52	1	2	kept	kept	kept	kept
clec-22	61	5	10	kept	kept	kept	kept
clec-223	57	5	6	kept	kept	kept	kept
clec-227	60	2	8	kept	kept	kept	kept
clec-24	61	5	11	kept	kept	kept	kept
clec-26	61	5	4	kept	kept	kept	kept
clec-266	66	7	7	kept	kept	kept	kept
clec-27	61	5	6	kept	kept	kept	kept
clec-28	61	6	1	kept	kept	kept	kept
clec-29	61	4	7	kept	kept	kept	kept
clec-3	16	3	2	kept	kept	removed	kept
clec-31	61	5	9	kept	kept	kept	kept
clec-33	61	6	2	kept	removed	kept	kept
clec-34	61	4	6	kept	kept	kept	kept
clec-35	61	5	7	kept	kept	kept	kept
clec-38	61	4	8	kept	kept	kept	kept
clec-39	61	4	5	kept	kept	kept	kept
clec-4	25	2	5	kept	kept	removed	kept
clec-40	61	5	5	kept	kept	kept	kept
clec-41	59	3	6	kept	kept	kept	kept
clec-42	61	7	11	kept	kept	kept	kept
clec-43	15	5	3	kept	kept	removed	kept
clec-44	15	5	6	kept	kept	removed	kept
clec-48	61	7	10	kept	kept	kept	kept
clec-49	62	4	1	kept	kept	kept	kept
clec-51	43	2	1	kept	kept	kept	kept
clec-52	43	2	2	kept	kept	kept	kept
clec-53	2	2	9	kept	kept	removed	kept
clec-54	60	2	11	kept	kept	kept	kept
clec-55	60	3	2	kept	kept	kept	kept
clec-56	60	2	10	kept	kept	kept	kept
clec-57	60	2	9	kept	kept	kept	kept
clec-6	29	7	6	kept	kept	kept	kept
clec-7	54	4	6	kept	kept	kept	kept
clec-78	40	4	5	kept	kept	kept	kept
clec-8	25	2	4	kept	kept	kept	kept
clec-86	67	2	2	removed	kept	removed	kept
clec-88	18	8	2	kept	kept	kept	kept
clec-9	61	4	2	kept	kept	kept	kept
clh-1	24	7	2	kept	kept	kept	kept
clh-2	24	2	9	kept	kept	removed	kept
clh-3	19	8	2	kept	kept	kept	kept
clh-4	64	8	9	kept	kept	kept	kept
clh-5	22	1	1	kept	kept	kept	kept
clhm-1	19	3	11	kept	kept	kept	kept
clic-1	54	5	9	kept	kept	kept	kept
clk-1	30	4	6	kept	kept	removed	kept
cln-3.2	3	6	2	kept	kept	removed	kept
cln-3.3	55	4	2	kept	removed	kept	kept
clp-1	33	5	7	kept	kept	kept	kept
clp-2	29	5	8	kept	kept	kept	kept
clp-3	10	8	6	kept	kept	removed	kept
clp-4	38	4	9	kept	kept	kept	kept
clp-6	39	7	5	kept	kept	removed	kept
clp-7	39	7	4	kept	kept	kept	kept
clpf-1	28	1	5	kept	kept	removed	kept
clr-1	17	8	8	kept	kept	kept	kept
cls-1	33	1	8	kept	kept	kept	kept
cls-2	34	6	10	kept	kept	kept	kept
cls-3	34	8	1	kept	kept	kept	kept
clsp-1	8	4	2	kept	kept	kept	kept
clu-1	35	2	3	kept	kept	kept	kept
clx-1	42	6	3	kept	kept	kept	kept
cmd-1	51	2	1	kept	removed	removed	removed
cmk-1	39	8	5	kept	kept	kept	removed
cmt-1	2	7	10	kept	kept	kept	kept
cnd-1	30	4	4	kept	kept	removed	kept
cnep-1	19	8	10	kept	kept	kept	kept
cnep-1	20	1	2	kept	kept	kept	kept
cng-1	60	5	9	kept	kept	kept	kept
cng-2	50	6	5	kept	kept	kept	kept
cng-2	50	6	6	kept	kept	kept	kept
cng-3	44	4	10	kept	kept	kept	kept
cni-1	59	3	7	kept	kept	kept	kept
cnk-1	35	8	9	removed	kept	kept	kept
cnnm-1	49	4	7	kept	kept	kept	kept
cnnm-3	64	3	10	removed	kept	kept	kept
cnnm-3	64	4	1	kept	kept	kept	kept
cnnm-4	6	2	3	kept	removed	kept	kept
cnt-1	24	8	6	kept	kept	kept	kept
cnt-2	36	3	8	kept	kept	kept	kept
cnx-1	35	5	5	kept	kept	kept	kept
coel-1	65	1	8	kept	kept	kept	kept
cof-2	4	8	6	kept	kept	kept	kept
cogc-1	14	1	9	kept	kept	kept	kept
cogc-1	14	1	10	kept	kept	removed	kept
cogc-2	42	1	11	kept	kept	kept	removed
cogc-3	14	4	10	kept	kept	kept	kept
cogc-4	27	1	6	kept	kept	kept	kept
cogc-4	27	1	7	kept	kept	kept	kept
cogc-4	27	1	9	kept	kept	kept	kept
cogc-4	27	1	10	kept	kept	kept	kept
cogc-5	2	6	3	kept	kept	removed	kept
cogc-6	54	8	4	kept	kept	kept	kept
cogc-8	39	1	8	kept	kept	kept	kept
coh-1	67	3	10	removed	kept	kept	kept
col-10	55	5	11	kept	kept	kept	kept
col-101	39	2	7	kept	kept	kept	kept
col-104	39	6	5	kept	kept	removed	kept
col-106	39	6	11	kept	kept	kept	kept
col-106	39	7	3	kept	kept	removed	kept
col-107	39	7	8	kept	kept	removed	kept
col-108	50	2	6	kept	kept	kept	kept
col-111	40	7	8	kept	kept	kept	kept
col-113	42	2	6	kept	kept	kept	removed
col-118	43	7	8	kept	kept	kept	kept
col-119	43	8	10	kept	kept	kept	removed
col-12	56	7	3	kept	kept	kept	kept
col-120	44	2	10	kept	kept	kept	removed
col-122	44	5	8	kept	kept	kept	kept
col-127	46	5	2	kept	kept	kept	kept
col-130	47	6	10	kept	kept	kept	kept
col-131	48	1	9	kept	kept	kept	kept
col-132	48	2	2	kept	kept	kept	kept
col-133	48	7	8	kept	kept	kept	kept
col-137	49	2	6	kept	kept	kept	kept
col-138	49	4	8	kept	kept	kept	kept
col-14	42	6	8	kept	kept	kept	kept
col-140	53	3	7	kept	kept	kept	removed
col-142	54	1	9	kept	kept	kept	removed
col-143	54	1	8	kept	kept	kept	kept
col-144	55	5	9	kept	kept	kept	kept
col-145	55	5	10	kept	removed	kept	kept
col-146	56	1	7	kept	kept	kept	kept
col-148	56	5	5	kept	kept	kept	kept
col-149	56	5	9	kept	kept	kept	kept
col-150	56	5	10	kept	kept	kept	kept
col-153	57	3	1	kept	kept	kept	kept
col-154	57	5	10	kept	kept	kept	kept
col-155	57	5	11	kept	kept	kept	kept
col-156	57	6	5	kept	kept	kept	kept
col-157	57	6	7	kept	empty	kept	kept
col-158	58	1	3	kept	kept	kept	kept
col-159	59	3	8	kept	kept	kept	kept
col-160	59	3	9	kept	kept	kept	kept
col-161	59	4	2	kept	kept	kept	kept
col-162	59	5	1	kept	kept	kept	kept
col-164	63	7	11	kept	kept	kept	kept
col-165	65	2	3	kept	kept	kept	kept
col-166	66	6	3	kept	kept	kept	kept
col-17	17	3	2	kept	kept	removed	kept
col-172	66	7	9	removed	kept	kept	removed
col-173	67	1	4	kept	kept	removed	kept
col-174	67	4	2	removed	kept	kept	kept
col-175	68	3	10	removed	kept	kept	kept
col-176	68	8	2	removed	kept	kept	kept
col-178	69	5	6	kept	kept	kept	kept
col-179	69	5	7	kept	kept	kept	kept
col-181	70	1	9	removed	kept	kept	kept
col-184	70	8	3	kept	kept	kept	kept
col-186	72	2	11	kept	kept	kept	kept
col-19	63	1	10	kept	removed	removed	kept
col-3	43	7	6	kept	kept	kept	kept
col-34	40	5	8	kept	removed	removed	kept
col-35	6	4	5	kept	kept	removed	kept
col-38	21	3	8	kept	kept	kept	kept
col-39	23	4	10	kept	kept	kept	kept
col-40	15	5	11	removed	kept	removed	kept
col-41	71	7	8	kept	removed	removed	kept
col-43	54	7	4	kept	kept	kept	kept
col-45	1	1	8	kept	kept	kept	kept
col-48	14	2	3	kept	kept	kept	kept
col-48	14	2	4	kept	kept	kept	kept
col-49	1	7	1	kept	kept	kept	kept
col-50	1	8	5	kept	kept	kept	kept
col-54	4	4	8	removed	kept	kept	kept
col-58	5	1	1	removed	kept	kept	kept
col-60	5	8	10	kept	kept	kept	kept
col-61	6	1	11	kept	kept	kept	kept
col-62	6	4	7	kept	kept	kept	kept
col-64	9	4	2	kept	kept	removed	kept
col-68	14	8	2	kept	kept	kept	kept
col-69	15	1	8	kept	kept	kept	kept
col-7	6	4	6	kept	kept	removed	kept
col-71	16	5	4	kept	kept	kept	kept
col-75	18	8	8	kept	kept	kept	kept
col-77	21	1	8	kept	kept	kept	kept
col-78	22	1	7	kept	kept	kept	kept
col-79	23	4	9	kept	kept	removed	kept
col-8	32	4	7	kept	kept	kept	kept
col-80	23	4	11	kept	kept	removed	kept
col-81	23	7	5	kept	kept	kept	kept
col-84	24	7	5	kept	kept	kept	kept
col-85	25	2	2	kept	kept	kept	kept
col-86	25	3	5	kept	kept	kept	kept
col-89	29	5	10	kept	kept	kept	kept
col-90	33	4	10	kept	kept	kept	kept
col-92	36	6	6	kept	kept	kept	kept
col-93	36	6	5	kept	kept	kept	kept
col-94	36	6	3	kept	kept	kept	kept
col-99	39	1	6	kept	kept	kept	kept
comt-1	64	3	5	kept	kept	kept	kept
comt-2	61	3	9	kept	kept	kept	kept
comt-3	51	4	8	kept	kept	kept	kept
comt-4	51	4	7	kept	kept	kept	kept
comt-5	51	4	6	kept	kept	kept	kept
copa-1	14	4	9	kept	kept	removed	kept
copb-1	16	3	5	removed	removed	removed	removed
copb-2	44	4	9	removed	removed	removed	removed
copd-1	32	2	1	removed	removed	removed	removed
cope-1	37	8	10	removed	kept	removed	kept
copz-1	23	6	7	removed	removed	removed	removed
coq-1	3	7	4	kept	kept	kept	kept
coq-3	48	8	7	kept	kept	kept	kept
coq-4	2	2	6	kept	kept	removed	kept
coq-6	55	7	5	kept	kept	kept	kept
coq-8	29	7	1	kept	kept	kept	kept
cor-1	35	8	6	kept	kept	kept	kept
cox-10	26	8	3	kept	kept	kept	kept
cox-11	48	3	7	kept	kept	kept	kept
cox-15	24	1	4	kept	kept	kept	kept
cpb-1	34	8	7	kept	kept	kept	kept
cpb-2	18	6	5	kept	kept	kept	kept
cpb-3	4	3	11	kept	kept	kept	kept
cpd-1	3	8	5	kept	kept	kept	kept
cpd-2	72	3	4	kept	kept	kept	kept
cpf-1	21	4	4	kept	kept	kept	kept
cpf-2	37	7	5	removed	kept	removed	kept
cpi-1	41	5	11	kept	removed	kept	kept
cpi-2	53	4	10	kept	kept	kept	kept
cpin-1	44	4	8	kept	kept	kept	kept
cpl-1	61	3	11	kept	kept	kept	kept
cpn-1	7	6	9	removed	kept	removed	kept
cpn-2	15	1	9	kept	kept	kept	kept
cpn-4	10	4	7	kept	kept	removed	kept
cpr-1	58	2	1	kept	kept	removed	kept
cpr-3	60	7	8	kept	kept	kept	kept
cpr-6	66	7	6	kept	kept	kept	kept
cpr-8	51	1	9	kept	kept	kept	kept
cpsf-1	50	5	11	kept	kept	kept	kept
cpsf-1	50	6	1	kept	kept	kept	kept
cpsf-2	54	3	3	kept	kept	kept	kept
cpsf-4	47	3	10	kept	kept	kept	kept
cpt-2	46	4	7	kept	kept	kept	kept
cpz-1	1	6	2	kept	kept	kept	kept
cpz-2	59	4	8	kept	kept	kept	kept
cra-1	32	3	1	kept	kept	kept	kept
crb-1	72	7	6	kept	kept	kept	kept
crh-2	17	6	1	kept	kept	kept	kept
cri-1	8	8	5	kept	kept	kept	kept
cri-2	54	8	3	kept	removed	kept	removed
cri-3	28	1	4	kept	kept	kept	kept
crls-1	27	6	8	kept	kept	kept	kept
crm-1	56	6	7	kept	kept	kept	kept
crml-1	6	1	6	kept	removed	kept	kept
crn-1	13	7	7	kept	kept	kept	kept
crn-2	53	1	5	kept	kept	kept	kept
crn-3	23	4	1	kept	kept	kept	kept
crn-5	23	4	2	kept	kept	kept	kept
crn-6	34	8	10	kept	kept	kept	kept
crn-7	33	8	4	kept	kept	kept	removed
crp-1	56	7	10	kept	kept	kept	kept
crt-1	53	5	2	kept	kept	kept	kept
csn-2	4	6	1	kept	kept	kept	removed
csn-4	50	2	8	kept	kept	kept	kept
csn-5	41	4	2	kept	kept	kept	kept
csnk-1	9	6	11	kept	kept	removed	kept
csp-3	10	7	2	kept	kept	kept	kept
csq-1	71	5	2	kept	removed	kept	kept
ctbp-1	66	3	5	removed	kept	kept	kept
cTel7X.1	63	1	7	kept	removed	kept	kept
ctg-1	5	7	10	kept	kept	kept	kept
cth-1	61	2	4	kept	kept	kept	kept
cth-2	19	5	7	removed	kept	kept	kept
ctl-2	26	1	8	kept	kept	kept	kept
ctl-3	26	1	9	kept	kept	removed	kept
ctn-1	1	5	11	kept	kept	kept	kept
ctns-1	20	7	3	kept	kept	kept	kept
ctps-1	61	4	11	kept	kept	kept	kept
cts-1	35	7	11	kept	kept	kept	kept
ctsa-1	18	8	1	kept	kept	kept	kept
ctsa-2	32	1	10	kept	kept	kept	kept
cua-1	37	8	11	removed	kept	kept	removed
cuc-1	33	3	9	kept	kept	kept	kept
cul-1	36	2	4	kept	kept	kept	kept
cul-4	20	1	1	kept	kept	kept	kept
cul-5	56	4	9	kept	kept	kept	kept
cul-6	47	7	10	kept	kept	kept	kept
cup-2	9	7	11	kept	kept	kept	kept
cup-5	33	2	2	kept	kept	kept	kept
cutc-1	34	1	7	kept	kept	kept	kept
cux-7	33	1	11	kept	kept	kept	kept
cwn-2	45	1	8	kept	kept	kept	kept
cya-1	34	7	4	kept	kept	kept	kept
cyb-1	45	7	11	kept	kept	kept	kept
cyb-2.1	46	1	9	kept	kept	kept	kept
cyb-3	60	8	3	kept	kept	kept	kept
cyc-1	7	1	7	kept	kept	kept	kept
cyc-2.1	40	8	6	kept	kept	kept	kept
cyc-2.2	58	8	2	kept	kept	kept	kept
cyd-1	25	2	8	kept	kept	removed	kept
cye-1	5	5	9	kept	kept	kept	kept
cyh-1	16	5	6	kept	kept	kept	kept
cyk-1	32	4	8	kept	kept	kept	kept
cyk-3	31	3	7	kept	kept	kept	kept
cyk-4	38	3	3	kept	kept	kept	kept
cyl-1	58	2	6	kept	kept	kept	removed
cyld-1	35	6	2	kept	kept	kept	kept
cyn-11	21	6	1	kept	kept	kept	kept
cyn-12	42	2	4	kept	kept	kept	kept
cyn-15	12	3	3	kept	kept	kept	kept
cyn-2	38	2	8	kept	kept	kept	kept
cyn-3	60	7	1	kept	kept	kept	kept
cyn-4	23	6	6	kept	kept	kept	kept
cyn-6	27	4	8	kept	kept	kept	kept
cyn-7	60	6	11	kept	kept	kept	kept
cyn-8	68	2	8	kept	kept	kept	kept
cyn-9	28	3	3	kept	kept	kept	kept
cyp-13A1	22	6	7	kept	kept	kept	kept
cyp-13A11	37	6	11	removed	kept	kept	kept
cyp-13A12	37	7	1	kept	kept	kept	kept
cyp-13A2	22	6	6	kept	kept	removed	removed
cyp-13A3	22	6	5	kept	removed	kept	kept
cyp-13A4	22	6	1	kept	kept	kept	kept
cyp-13A5	22	6	2	kept	kept	kept	kept
cyp-13A6	22	6	3	kept	kept	kept	kept
cyp-13A8	22	6	4	kept	kept	kept	kept
cyp-13B1	70	7	9	kept	kept	kept	kept
cyp-13B2	71	3	2	kept	removed	removed	kept
cyp-14A1	70	7	1	removed	kept	kept	kept
cyp-14A2	70	7	2	kept	kept	kept	kept
cyp-14A3	70	7	3	removed	kept	kept	kept
cyp-14A4	70	7	4	kept	kept	kept	kept
cyp-14A5	52	8	6	kept	kept	kept	kept
cyp-23A1	17	1	1	kept	kept	kept	kept
cyp-25A1	28	4	5	kept	kept	kept	kept
cyp-25A2	28	4	6	kept	kept	kept	kept
cyp-25A3	28	4	7	kept	kept	kept	kept
cyp-25A4	28	4	10	kept	kept	kept	kept
cyp-25A5	40	1	10	kept	kept	kept	kept
cyp-25A6	40	4	11	kept	kept	kept	kept
cyp-29A2	57	4	10	kept	kept	kept	kept
cyp-29A3	50	6	11	kept	kept	kept	kept
cyp-29A4	56	1	8	kept	kept	kept	kept
cyp-31A2	46	7	1	kept	kept	kept	kept
cyp-31A3	40	8	9	kept	kept	kept	kept
cyp-32A1	54	5	10	kept	kept	kept	kept
cyp-33A1	54	5	8	kept	kept	kept	kept
cyp-33B1	55	4	11	kept	kept	kept	kept
cyp-33C1	51	5	4	kept	kept	kept	kept
cyp-33C12	51	5	6	kept	kept	kept	kept
cyp-33C2	51	5	5	kept	kept	kept	kept
cyp-33C3	51	5	10	kept	kept	kept	kept
cyp-33C4	51	5	7	kept	kept	kept	kept
cyp-33C5	51	5	9	kept	kept	kept	kept
cyp-33C6	51	5	11	kept	kept	kept	kept
cyp-33C7	51	5	8	kept	kept	removed	kept
cyp-33C8	52	2	10	kept	kept	kept	kept
cyp-33C9	52	1	1	kept	kept	kept	removed
cyp-33D1	61	2	7	kept	kept	kept	kept
cyp-33E1	43	5	8	kept	kept	kept	kept
cyp-33E2	43	5	7	kept	kept	kept	kept
cyp-34A1	60	7	6	kept	kept	kept	kept
cyp-34A2	60	7	7	kept	kept	kept	kept
cyp-34A3	60	7	2	kept	kept	kept	kept
cyp-34A4	52	3	8	kept	kept	kept	kept
cyp-34A6	52	3	9	kept	kept	kept	kept
cyp-34A7	52	3	10	kept	kept	kept	kept
cyp-34A9	52	3	11	kept	kept	kept	kept
cyp-35A1	54	4	7	kept	removed	kept	kept
cyp-35A2	54	4	8	kept	kept	kept	removed
cyp-35A3	52	4	1	kept	kept	kept	kept
cyp-35A4	52	4	2	kept	kept	kept	kept
cyp-35A5	52	3	6	kept	kept	kept	kept
cyp-35B1	52	3	5	kept	kept	kept	kept
cyp-35B2	52	3	4	kept	kept	kept	kept
cyp-35B3	52	3	3	kept	kept	kept	kept
cyp-35C1	59	8	5	kept	kept	kept	kept
cyp-35D1	61	2	3	kept	kept	kept	kept
cyp-36A1	7	4	2	kept	kept	kept	kept
cyp-37A1	25	7	10	kept	kept	kept	kept
cyp-42A1	62	1	6	kept	kept	removed	kept
cyp-42A1	62	1	7	kept	removed	kept	kept
cyp-43A1	66	2	4	kept	kept	kept	kept
cyp-44A1	18	1	1	kept	kept	kept	kept
cysl-1	68	7	6	removed	kept	kept	kept
cysl-2	26	3	2	kept	kept	removed	kept
cysl-3	52	2	8	kept	kept	kept	kept
cysl-4	51	4	5	kept	kept	kept	kept
cytb-5.1	71	2	4	removed	kept	kept	kept
cyy-1	34	1	5	kept	kept	kept	kept
czw-1	42	8	11	kept	kept	kept	kept
D1005.2	63	6	10	kept	kept	kept	kept
D1007.15	2	8	8	kept	kept	removed	kept
D1007.5	2	8	4	kept	kept	kept	kept
D1037.1	1	8	7	kept	kept	kept	kept
D1043.1	24	4	8	kept	kept	kept	kept
D1054.1	57	2	2	kept	kept	kept	kept
D1054.3	57	2	4	kept	kept	kept	kept
D1054.8	57	2	5	kept	kept	kept	kept
D1069.3	72	8	6	kept	kept	kept	kept
D2005.3	6	7	9	kept	kept	kept	kept
D2013.6	22	3	1	kept	kept	kept	kept
D2023.1	57	8	9	kept	kept	kept	kept
D2023.3	57	8	11	kept	kept	kept	kept
D2023.6	58	1	2	kept	kept	kept	kept
D2030.2	6	5	7	kept	kept	kept	kept
D2030.4	6	5	8	removed	kept	kept	kept
D2030.8	6	5	11	kept	kept	removed	kept
D2045.2	36	2	3	kept	kept	kept	kept
D2045.7	36	2	5	kept	kept	kept	kept
D2045.8	36	2	6	kept	kept	kept	kept
D2045.9	36	2	7	kept	kept	kept	kept
D2085.3	21	5	2	kept	kept	kept	kept
D2085.4	21	5	3	kept	kept	removed	kept
D2092.4	5	4	6	kept	kept	removed	kept
D2096.1	43	3	11	kept	removed	kept	kept
daam-1	50	7	1	kept	kept	kept	kept
daao-1	50	5	6	kept	kept	kept	kept
dab-1	20	8	5	kept	kept	kept	kept
dac-1	27	5	3	kept	kept	kept	kept
dad-1	5	4	1	kept	kept	kept	kept
daf-1	39	1	3	kept	kept	kept	kept
daf-10	44	2	1	kept	kept	kept	kept
daf-12	69	3	1	kept	kept	kept	kept
daf-14	45	5	1	kept	kept	kept	kept
daf-15	44	4	4	kept	kept	kept	kept
daf-16	10	4	1	kept	kept	kept	kept
daf-18	39	3	6	kept	kept	kept	kept
daf-19	23	1	4	kept	kept	removed	kept
daf-2	38	7	2	kept	kept	kept	kept
daf-22	25	1	11	kept	kept	kept	kept
daf-3	63	3	6	kept	kept	kept	kept
daf-4	30	7	4	kept	kept	kept	kept
daf-6	71	6	5	removed	kept	kept	kept
daf-7	27	5	4	kept	kept	removed	kept
daf-8	7	5	11	removed	kept	removed	kept
daf-9	66	5	6	kept	kept	kept	kept
dagl-2	27	4	11	kept	kept	kept	kept
dao-3	67	7	2	removed	kept	kept	kept
dao-5	9	6	7	kept	kept	kept	kept
dapk-1	1	4	3	kept	kept	removed	kept
dars-1	35	1	8	removed	kept	kept	removed
dars-2	58	3	2	kept	kept	kept	kept
dat-1	34	8	5	kept	kept	kept	kept
daz-1	17	8	9	kept	kept	kept	kept
dbl-1	54	1	1	kept	removed	kept	kept
dbn-1	38	3	1	kept	kept	kept	kept
dbr-1	5	3	1	kept	removed	kept	kept
DC2.5	50	7	7	kept	kept	kept	kept
dcaf-1	44	6	6	kept	kept	kept	kept
dcap-1	50	3	9	kept	kept	kept	kept
dcap-1	50	3	11	kept	kept	kept	kept
dcap-2	48	4	11	kept	kept	kept	kept
dcap-2	48	5	4	kept	kept	kept	kept
dcn-1	29	1	5	kept	kept	kept	kept
dcp-66	6	5	1	kept	kept	kept	kept
dcr-1	33	6	5	kept	kept	kept	kept
dcs-1	62	4	3	kept	kept	kept	kept
dct-1	67	6	5	removed	kept	kept	kept
ddb-1	47	4	4	kept	kept	kept	kept
ddl-1	18	2	2	kept	kept	kept	kept
ddl-2	25	5	1	kept	kept	removed	kept
ddl-3	26	1	11	kept	kept	kept	kept
ddo-1	61	7	1	kept	kept	kept	kept
ddo-2	54	5	1	kept	kept	kept	kept
ddo-3	32	1	5	removed	kept	kept	kept
ddo-3	32	1	8	kept	kept	kept	kept
ddp-1	38	4	7	kept	kept	kept	kept
ddr-1	66	1	2	kept	kept	kept	kept
ddr-2	64	5	9	kept	kept	kept	kept
ddx-15	30	7	2	kept	kept	kept	kept
ddx-19	21	7	6	kept	kept	kept	kept
ddx-23	31	1	10	kept	kept	kept	kept
ddx-27	14	6	6	kept	kept	kept	kept
ddx-27	14	6	9	kept	kept	kept	kept
decr-1.2	21	3	5	kept	kept	kept	kept
decr-1.3	20	7	9	kept	kept	kept	kept
deg-1	67	5	9	kept	kept	kept	kept
deg-3	57	6	2	kept	kept	kept	kept
del-1	71	3	3	kept	removed	kept	kept
del-4	7	2	8	kept	kept	removed	kept
del-9	64	7	3	kept	kept	kept	kept
delm-1	44	1	11	kept	kept	kept	kept
delm-2	2	4	1	empty	kept	kept	kept
denn-4	39	8	9	kept	kept	kept	kept
dep-1	21	8	7	kept	kept	kept	kept
des-2	57	6	3	kept	removed	kept	kept
dgat-2	61	6	8	kept	kept	kept	kept
dgk-2	65	3	2	kept	kept	removed	kept
dgk-3	34	7	7	kept	kept	kept	kept
dgk-4	43	5	5	kept	kept	kept	kept
dgk-5	18	8	11	kept	kept	kept	kept
dgn-1	69	4	5	kept	kept	kept	kept
dgtr-1	53	7	2	kept	kept	kept	kept
dhc-1	2	7	6	kept	kept	removed	removed
dhcr-7	62	4	8	kept	removed	kept	kept
dhfr-1	7	8	5	kept	kept	removed	kept
dhhc-1	71	7	6	kept	removed	kept	kept
dhhc-10	65	4	1	kept	kept	kept	kept
dhhc-11	4	3	8	kept	kept	kept	kept
dhhc-12	10	1	1	kept	kept	kept	kept
dhhc-13	41	5	1	kept	kept	kept	kept
dhhc-14	68	1	6	removed	kept	kept	kept
dhhc-6	47	4	7	kept	kept	kept	kept
dhhc-9	64	1	7	kept	kept	kept	kept
dhod-1	5	5	1	kept	kept	kept	kept
dhp-1	6	2	6	kept	kept	removed	kept
dhp-2	45	1	2	kept	kept	kept	kept
dhrs-4	59	2	4	kept	kept	kept	kept
dhs-1	3	6	3	kept	kept	kept	kept
dhs-14	51	7	11	kept	kept	kept	kept
dhs-15	51	7	9	kept	kept	kept	kept
dhs-15	51	8	2	kept	kept	kept	kept
dhs-16	53	4	2	kept	kept	kept	kept
dhs-17	53	4	9	kept	kept	kept	kept
dhs-18	57	3	10	kept	kept	kept	kept
dhs-19	57	6	8	kept	kept	kept	kept
dhs-2	3	6	11	kept	kept	kept	kept
dhs-20	57	7	3	kept	kept	kept	kept
dhs-21	58	8	9	kept	kept	kept	kept
dhs-23	60	8	1	kept	kept	kept	kept
dhs-25	63	7	1	kept	kept	kept	kept
dhs-26	64	5	10	removed	kept	kept	removed
dhs-28	67	1	1	kept	kept	kept	kept
dhs-3	7	2	10	kept	kept	kept	kept
dhs-30	72	6	9	kept	kept	kept	kept
dhs-31	45	1	7	kept	kept	kept	kept
dhs-4	9	1	3	removed	kept	kept	removed
dhs-7	19	7	11	kept	kept	kept	kept
dhs-8	26	3	3	kept	kept	kept	kept
dhs-9	30	5	6	kept	kept	kept	kept
dhs-9	30	5	8	kept	kept	kept	kept
dic-1	43	5	10	kept	kept	kept	removed
did-2	1	5	6	kept	kept	removed	kept
dif-1	42	5	5	kept	kept	kept	kept
din-1	24	5	1	kept	kept	kept	kept
dip-2	3	3	3	kept	kept	kept	kept
dis-3	45	2	1	kept	kept	kept	kept
disl-2	30	6	2	kept	kept	removed	kept
div-1	35	8	5	kept	kept	kept	kept
djr-1.1	15	1	2	kept	kept	kept	kept
dkf-2	61	4	3	kept	kept	kept	kept
dlat-1	60	2	2	kept	kept	kept	kept
dlc-1	32	1	1	kept	kept	kept	kept
dlc-2	47	4	2	kept	kept	kept	kept
dld-1	48	8	2	kept	removed	kept	kept
dli-1	48	2	6	kept	kept	kept	kept
dlk-1	11	4	5	kept	kept	removed	kept
dlst-1	53	8	11	kept	kept	kept	kept
dmd-4	71	6	3	kept	kept	kept	kept
dmd-5	18	3	7	kept	kept	removed	kept
dna-2	24	6	8	kept	kept	kept	kept
dnc-1	46	1	3	kept	kept	kept	kept
dnj-1	46	6	2	kept	kept	kept	kept
dnj-11	41	7	8	kept	removed	kept	kept
dnj-12	13	1	10	kept	kept	removed	kept
dnj-13	24	4	4	kept	kept	kept	kept
dnj-14	65	4	6	kept	kept	kept	kept
dnj-15	40	4	8	kept	kept	kept	kept
dnj-16	28	8	2	kept	kept	kept	kept
dnj-17	37	8	5	removed	kept	kept	kept
dnj-18	29	5	3	kept	kept	kept	kept
dnj-19	52	8	10	kept	kept	kept	kept
dnj-2	46	5	6	kept	kept	kept	kept
dnj-20	22	4	9	kept	kept	kept	kept
dnj-21	4	3	1	removed	kept	removed	removed
dnj-22	55	1	11	kept	kept	kept	kept
dnj-23	22	1	3	kept	kept	kept	kept
dnj-24	30	5	10	kept	kept	kept	kept
dnj-25	62	5	7	kept	empty	removed	kept
dnj-28	14	2	6	kept	kept	kept	kept
dnj-30	14	5	7	kept	kept	kept	kept
dnj-4	3	6	4	kept	kept	kept	kept
dnj-5	19	3	9	kept	kept	kept	kept
dnj-7	67	2	7	kept	kept	kept	kept
dnj-8	19	2	3	kept	removed	kept	kept
dnpp-1	31	2	1	kept	kept	kept	kept
dod-18	7	1	5	kept	kept	removed	kept
dod-18	7	1	6	kept	kept	removed	kept
dog-1	13	3	3	kept	kept	kept	kept
dohh-1	23	3	10	kept	kept	removed	kept
dom-3	3	3	8	kept	kept	kept	kept
dop-1	65	2	6	kept	kept	kept	kept
dop-2	56	1	3	kept	kept	kept	kept
dop-4	63	6	5	kept	kept	kept	kept
dop-5	57	5	9	kept	kept	kept	kept
dop-6	65	2	2	kept	kept	kept	kept
dot-1.1	13	5	4	removed	kept	removed	kept
dot-1.2	70	1	2	kept	kept	kept	kept
dot-1.3	70	3	1	kept	kept	kept	kept
dot-1.5	63	7	8	kept	kept	kept	kept
dpf-1	60	8	4	kept	kept	kept	kept
dpf-2	71	6	4	removed	removed	kept	kept
dpf-3	5	6	2	kept	kept	kept	kept
dpf-4	31	1	8	kept	kept	kept	kept
dpf-5	41	1	1	kept	kept	kept	kept
dpf-6	33	5	8	kept	kept	kept	kept
dpff-1	31	2	9	kept	kept	kept	kept
dph-1	28	3	6	kept	kept	kept	kept
dph-3	44	6	7	kept	kept	kept	kept
dpl-1	22	1	8	kept	kept	kept	kept
dpm-3	47	6	8	kept	kept	kept	kept
dpt-1	7	4	10	kept	kept	kept	kept
dpy-11	53	7	9	kept	kept	kept	kept
dpy-13	40	5	3	kept	kept	kept	kept
dpy-17	30	2	1	kept	kept	kept	kept
dpy-18	36	8	9	kept	kept	kept	kept
dpy-19	34	3	5	kept	kept	kept	kept
dpy-2	19	2	11	kept	kept	kept	kept
dpy-22	68	6	6	removed	kept	kept	kept
dpy-23	65	2	4	kept	kept	kept	kept
dpy-27	28	4	3	kept	kept	removed	kept
dpy-28	36	5	2	kept	kept	kept	kept
dpy-3	63	8	5	kept	kept	removed	kept
dpy-30	58	4	5	kept	kept	kept	kept
dpy-4	49	1	2	kept	kept	kept	kept
dpy-6	68	1	1	removed	kept	removed	removed
dpy-7	67	4	4	kept	kept	removed	kept
drag-1	14	6	5	kept	kept	kept	kept
drd-1	21	2	1	kept	kept	kept	kept
drd-5	67	8	4	removed	kept	kept	removed
drh-1	41	7	10	kept	removed	kept	kept
drh-3	6	7	10	kept	kept	kept	kept
drn-1	17	6	8	kept	removed	kept	kept
dro-1	37	8	1	kept	kept	kept	kept
drp-1	41	3	10	kept	removed	kept	kept
drr-2	38	2	4	kept	kept	kept	kept
drsh-1	9	3	2	kept	kept	kept	kept
dsc-1	71	7	3	removed	kept	kept	kept
dsh-1	17	6	2	kept	kept	kept	kept
dsh-1	17	6	4	kept	kept	removed	kept
dsh-2	17	5	9	kept	kept	kept	kept
duox-2	1	1	6	removed	removed	removed	removed
duxl-1	15	7	3	kept	kept	kept	kept
dvc-1	57	5	1	kept	kept	kept	kept
dxbp-1	10	4	11	kept	kept	kept	kept
dyb-1	1	4	7	kept	kept	kept	kept
dyci-1	41	8	4	kept	removed	kept	kept
dyf-1	3	3	9	removed	kept	kept	kept
dyf-13	19	7	6	kept	kept	kept	kept
dyf-18	47	2	1	kept	kept	kept	kept
dyf-19	62	3	6	kept	kept	kept	kept
dyf-2	38	2	7	kept	kept	kept	kept
dyf-3	40	2	8	kept	kept	kept	kept
dyf-5	8	5	10	kept	kept	kept	kept
dyf-6	69	2	1	kept	kept	kept	kept
dylt-1	6	3	6	kept	kept	removed	kept
dylt-2	68	2	10	removed	kept	kept	kept
dylt-3	20	7	10	kept	kept	kept	kept
dyn-1	72	1	2	kept	kept	kept	removed
dyrb-1	22	1	5	kept	removed	kept	kept
dys-1	10	6	1	kept	kept	kept	kept
E01A2.h	2	4	7	kept	kept	removed	kept
E01A2.i	2	4	8	kept	kept	removed	kept
E02D9.1	5	6	1	kept	kept	kept	kept
E02H1.1	22	4	4	kept	kept	kept	kept
E02H1.2	22	4	5	kept	kept	kept	kept
E02H1.5	22	4	7	kept	kept	kept	kept
E02H1.6	22	4	8	kept	kept	kept	kept
E03A3.5	28	6	6	kept	kept	kept	kept
E03H4.11	11	2	9	kept	kept	kept	kept
E03H4.3	11	2	6	removed	kept	kept	kept
E03H4.8	11	2	7	kept	removed	removed	removed
E04A4.5	40	8	4	kept	kept	removed	removed
E04D5.1	23	2	11	kept	kept	removed	kept
E04F6.2	19	7	8	kept	kept	kept	kept
E04F6.8	19	8	1	kept	kept	kept	kept
eak-7	47	7	8	kept	kept	kept	kept
ears-2	39	3	3	kept	kept	kept	kept
eat-16	9	2	4	kept	kept	removed	kept
eat-17	72	4	5	kept	kept	kept	kept
eat-2	25	8	11	kept	kept	removed	kept
eat-3	22	2	11	kept	kept	removed	kept
eat-4	34	7	6	kept	kept	kept	kept
eat-6	59	3	5	kept	kept	kept	kept
ebax-1	45	5	9	kept	kept	kept	kept
ech-1.1	60	7	10	kept	kept	kept	kept
ech-1.2	4	7	11	kept	kept	kept	kept
ech-1.2	4	8	1	kept	kept	removed	kept
ech-2	47	2	5	kept	kept	kept	kept
ech-4	23	5	10	kept	kept	kept	kept
ech-6	35	4	3	kept	kept	kept	kept
ech-8	45	4	9	kept	kept	kept	kept
ech-9	45	4	10	kept	kept	kept	kept
ect-2	23	5	4	kept	kept	kept	kept
eea-1	59	5	5	kept	kept	kept	kept
EEED8.12	17	8	4	kept	kept	kept	kept
EEED8.4	17	7	9	kept	kept	kept	kept
eef-1A.1	32	4	4	kept	kept	kept	kept
eef-1A.2	67	5	11	removed	kept	removed	kept
eef-1B.1	33	5	6	kept	kept	kept	kept
eef-1B.2	49	1	6	kept	kept	kept	kept
eef-1G	57	3	4	kept	kept	kept	kept
eef-2	8	4	1	kept	kept	removed	removed
eel-1	50	4	11	removed	kept	kept	kept
eel-1	50	5	1	kept	kept	kept	kept
efa-6	47	8	2	kept	kept	kept	kept
efhd-1	26	1	1	kept	kept	kept	kept
efk-1	31	4	11	kept	kept	kept	kept
efl-1	61	6	3	kept	kept	kept	kept
efl-3	21	1	11	kept	kept	kept	kept
efsc-1	11	7	9	kept	kept	kept	kept
eftu-2	31	3	8	kept	kept	kept	removed
egal-1	41	4	8	kept	removed	kept	kept
egas-1	61	8	9	kept	kept	kept	kept
egas-2	61	8	10	kept	kept	kept	kept
egas-3	61	8	7	kept	kept	kept	kept
egas-4	42	4	6	kept	kept	kept	kept
egg-4	2	3	5	kept	kept	removed	kept
egg-5	2	4	11	kept	kept	kept	kept
egl-10	58	7	1	kept	kept	kept	kept
egl-13	66	2	1	kept	kept	kept	kept
egl-15	69	5	2	kept	kept	kept	kept
egl-18	39	8	6	kept	kept	kept	kept
egl-19	42	3	7	kept	kept	kept	kept
egl-2	51	2	5	kept	kept	kept	kept
egl-20	44	7	3	kept	kept	kept	kept
egl-23	48	7	2	kept	kept	kept	kept
egl-27	19	3	8	kept	kept	kept	kept
egl-3	56	4	8	kept	kept	kept	kept
egl-30	1	4	11	removed	kept	kept	kept
egl-36	69	3	6	kept	kept	kept	kept
egl-38	45	2	2	kept	kept	kept	removed
egl-43	22	7	11	kept	kept	kept	kept
egl-44	18	5	1	kept	kept	kept	kept
egl-45	33	3	7	removed	kept	removed	removed
egl-46	53	8	9	kept	kept	kept	kept
egl-8	50	6	9	removed	kept	kept	kept
egl-9	56	7	8	kept	kept	kept	kept
ego-1	6	6	5	kept	kept	kept	kept
egrh-1	71	6	1	kept	kept	kept	kept
egrh-2	50	2	9	kept	kept	kept	kept
ehbp-1	56	1	1	removed	kept	kept	kept
eif-1	17	4	8	kept	kept	removed	kept
eif-1.A	41	1	2	kept	kept	kept	kept
eif-3.B	26	4	7	removed	kept	removed	removed
eif-3.D	34	5	11	kept	kept	kept	kept
eif-3.E	10	3	3	kept	kept	kept	kept
eif-3.F	22	3	2	kept	kept	removed	removed
eif-3.G	21	2	7	kept	kept	removed	removed
eif-3.H	2	7	8	kept	kept	removed	kept
eif-3.I	13	5	6	removed	kept	removed	kept
eif-3.J	12	1	10	kept	kept	kept	kept
eif-3.K	59	2	6	kept	kept	kept	kept
eif-6	11	7	7	kept	kept	removed	kept
eipr-1	12	3	6	removed	kept	removed	kept
ekl-4	12	7	1	kept	kept	kept	kept
ekl-6	35	6	9	kept	kept	kept	kept
elb-1	37	1	2	kept	kept	kept	kept
elc-1	38	3	8	removed	kept	kept	removed
elc-2	63	7	5	kept	kept	kept	kept
elks-1	40	2	2	kept	kept	kept	kept
elo-1	44	5	6	kept	kept	kept	kept
elo-2	49	7	1	kept	kept	kept	kept
elo-3	42	2	10	kept	kept	kept	removed
elo-4	34	8	8	kept	kept	kept	kept
elo-7	44	5	5	kept	kept	kept	kept
elo-8	36	7	9	kept	kept	kept	kept
elo-9	26	5	2	kept	kept	kept	kept
elp-1	62	5	9	kept	kept	kept	kept
elpc-1	3	4	5	kept	kept	kept	kept
elpc-3	58	4	4	kept	kept	kept	kept
elpc-4	43	1	5	kept	kept	kept	kept
elt-1	44	5	11	kept	kept	kept	kept
elt-6	39	8	10	removed	kept	kept	kept
emb-27	20	7	7	kept	kept	kept	kept
emb-30	35	1	4	kept	kept	kept	kept
emb-5	29	5	7	kept	kept	kept	kept
emb-8	30	3	4	kept	kept	kept	kept
emb-9	34	8	9	kept	kept	kept	kept
emc-1	15	7	1	kept	kept	kept	kept
eng-1	31	2	2	kept	kept	kept	kept
enol-1	21	7	9	kept	kept	kept	kept
enpl-1	46	3	2	kept	kept	kept	kept
ensa-1	9	3	6	kept	kept	kept	kept
ensh-1	68	2	9	kept	kept	kept	kept
ent-1	47	1	6	kept	kept	kept	kept
ent-2	72	1	6	kept	kept	kept	kept
ent-3	60	1	3	kept	kept	kept	kept
ent-5	65	3	11	kept	kept	removed	kept
ent-6	8	4	8	kept	kept	kept	kept
ent-7	45	1	5	kept	kept	kept	removed
epac-1	35	8	2	kept	kept	kept	kept
epc-1	37	4	10	kept	kept	kept	removed
epg-3	37	6	5	removed	kept	removed	kept
epg-4	32	5	11	kept	kept	kept	kept
epg-5	19	2	4	kept	kept	kept	kept
epg-7	67	3	2	removed	kept	kept	kept
ephx-1	16	6	5	kept	kept	kept	kept
epi-1	45	7	7	kept	kept	kept	kept
epn-1	71	5	11	removed	kept	removed	kept
eps-8	49	1	1	kept	kept	kept	kept
ercc-1	9	5	6	kept	kept	kept	kept
erd-2	68	8	6	removed	kept	kept	kept
erfa-1	53	6	8	removed	removed	removed	removed
erfa-3	57	4	4	kept	kept	kept	kept
eri-1	39	3	4	kept	kept	kept	kept
eri-1	39	3	5	kept	kept	kept	kept
eri-7	2	7	11	kept	kept	kept	kept
erl-1	47	5	7	kept	kept	kept	kept
erm-1	3	6	5	kept	kept	kept	kept
erp-1	64	7	11	kept	kept	kept	kept
erv-46	72	1	10	kept	kept	kept	kept
ess-2	34	2	6	kept	kept	kept	kept
esyt-2	31	5	9	kept	kept	kept	kept
ethe-1	44	5	3	kept	kept	kept	kept
etr-1	14	8	10	kept	kept	kept	kept
ets-4	66	7	2	kept	kept	kept	kept
ets-5	65	6	9	kept	kept	kept	kept
ets-7	54	5	6	kept	kept	kept	kept
ets-9	65	1	7	kept	kept	kept	kept
eva-1	13	2	5	kept	kept	kept	kept
evl-14	29	1	4	kept	kept	kept	kept
evl-20	21	2	6	kept	kept	kept	kept
exc-5	43	7	5	kept	kept	kept	kept
exc-6	27	6	10	kept	kept	kept	kept
exc-7	22	4	1	kept	kept	kept	kept
exl-1	26	2	8	kept	kept	kept	kept
exo-1	37	8	9	removed	kept	kept	kept
exo-3	10	7	4	kept	kept	kept	kept
exoc-7	2	5	11	kept	kept	kept	kept
exoc-8	12	6	10	kept	kept	kept	kept
exoc-8	12	6	11	kept	kept	removed	kept
exos-1	36	6	8	kept	kept	kept	kept
exos-3	10	1	2	kept	kept	removed	kept
exos-4.1	48	2	7	kept	kept	kept	kept
exos-7	62	6	5	kept	kept	kept	kept
exos-9	32	6	6	kept	kept	kept	kept
exp-2	53	5	5	kept	kept	kept	kept
eyg-1	22	6	8	kept	kept	kept	kept
F01D4.3	45	6	11	kept	kept	kept	kept
F01F1.2	31	1	6	kept	kept	kept	kept
F01G10.10	45	5	2	kept	kept	kept	kept
F01G12.1	72	4	3	kept	kept	kept	kept
F01G4.5	46	3	9	kept	kept	kept	kept
F01G4.6	46	3	10	kept	kept	kept	kept
F02A9.4	34	7	2	kept	kept	kept	kept
F02D8.4	60	5	4	kept	kept	kept	kept
F02E9.7	7	4	9	kept	kept	removed	kept
F07A11.4	24	4	10	kept	kept	kept	kept
F07A11.5	24	4	11	kept	kept	kept	kept
F07C6.4	47	8	7	kept	kept	kept	kept
F07E5.5	15	7	8	kept	kept	kept	kept
F07F6.4	17	8	5	kept	kept	kept	kept
F08A8.4	11	7	2	kept	kept	kept	removed
F08B4.7	43	6	3	kept	kept	kept	removed
F08F3.4	52	8	5	kept	kept	kept	kept
F08G12.1	69	6	4	kept	kept	kept	kept
F08H9.3	60	2	6	kept	kept	kept	kept
F08H9.4	60	2	7	kept	kept	kept	kept
F09A5.4	70	6	8	kept	kept	kept	kept
F09B12.3	71	7	7	kept	removed	kept	kept
F09E5.3	17	7	3	kept	kept	kept	kept
F09E5.7	17	7	6	kept	kept	kept	kept
F09E5.8	17	7	7	kept	kept	kept	kept
F09F7.4	30	6	9	kept	kept	removed	kept
F09F7.7	30	6	10	kept	kept	kept	kept
F09G2.2	54	3	1	kept	kept	kept	kept
F09G2.8	54	3	6	kept	kept	kept	kept
F09G8.5	33	8	7	kept	kept	kept	kept
F10C2.4	58	2	11	kept	kept	kept	kept
F10C2.5	58	3	1	kept	kept	kept	kept
F10D11.6	7	5	1	kept	kept	kept	kept
F10D7.2	72	7	2	kept	kept	kept	kept
F10D7.5	72	7	3	kept	kept	kept	kept
F10E7.11	19	7	1	kept	kept	kept	kept
F10E7.3	19	6	6	kept	kept	kept	kept
F10E7.5	19	6	8	kept	kept	kept	kept
F10E7.9	19	6	11	kept	kept	kept	kept
F10E9.5	33	8	8	kept	kept	kept	kept
F10F2.2	29	4	7	kept	kept	kept	kept
F10G7.10	17	2	1	kept	kept	kept	kept
F10G7.5	17	1	10	removed	kept	kept	kept
F10G8.9	9	5	7	kept	kept	kept	kept
F11A10.5	47	4	1	kept	kept	kept	removed
F11A3.2	55	8	5	kept	kept	removed	kept
F11C1.1	70	5	7	kept	kept	kept	kept
F11C1.4	70	5	9	kept	kept	kept	kept
F11C1.5	70	5	10	kept	kept	kept	kept
F11E6.3	49	6	11	kept	kept	kept	kept
F11E6.8	49	7	2	kept	kept	kept	kept
F11G11.13	17	3	3	kept	kept	kept	kept
F12E12.c	16	5	9	kept	kept	removed	kept
F12E12.i	16	5	10	kept	kept	kept	kept
F12F6.7	46	8	8	kept	kept	kept	kept
F13B12.1	45	6	8	kept	kept	kept	kept
F13B9.1	67	7	11	removed	kept	kept	kept
F13D11.3	66	3	1	kept	kept	kept	kept
F13D12.6	24	6	4	kept	kept	removed	kept
F13E6.1	69	3	2	kept	kept	removed	kept
F13E6.2	69	3	3	kept	kept	kept	kept
F13E9.1	45	8	11	kept	kept	kept	kept
F13G3.10	6	3	11	kept	kept	removed	kept
F13G3.6	6	3	8	removed	kept	kept	kept
F13G3.7	6	3	9	kept	kept	kept	kept
F13H10.3	46	1	11	kept	kept	kept	kept
F13H10.5	46	2	2	kept	kept	kept	kept
F13H8.2	18	7	1	kept	kept	kept	kept
F13H8.5	18	7	2	kept	kept	kept	kept
F13H8.9	18	7	4	kept	kept	kept	kept
F14B4.1	8	4	9	kept	kept	removed	kept
F14B6.4	10	8	10	removed	kept	removed	kept
F14B6.6	10	8	11	kept	kept	kept	kept
F14D7.6	60	1	5	kept	kept	kept	kept
F14E5.2	21	2	3	kept	kept	kept	kept
F14H8.7	60	5	10	kept	kept	kept	kept
F15D3.6	10	6	2	removed	kept	removed	removed
F15D4.4	25	4	4	kept	kept	kept	kept
F15E6.6	40	5	10	kept	kept	kept	kept
F16A11.1	8	6	1	kept	kept	kept	removed
F16B4.6	51	3	2	kept	kept	kept	kept
F16F9.1	67	8	11	kept	kept	removed	kept
F16H11.1	65	3	10	kept	kept	kept	kept
F17A9.2	53	5	4	kept	kept	kept	kept
F17B5.1	11	8	6	kept	kept	kept	kept
F17C11.10	57	3	5	kept	kept	kept	kept
F17C11.7	57	3	2	kept	kept	kept	kept
F17C8.6	29	5	11	kept	kept	kept	kept
F17E5.2	70	3	8	kept	kept	kept	kept
F17H10.1	70	6	5	kept	kept	kept	kept
F18A11.5	25	3	1	kept	kept	kept	kept
F18A11.6	25	3	2	kept	kept	kept	kept
F18C12.3	7	2	4	kept	kept	kept	kept
F18F11.1	39	2	9	kept	kept	kept	kept
F19C7.2	40	6	11	kept	kept	kept	kept
F19C7.4	40	7	1	kept	kept	kept	kept
F19C7.6	40	7	2	kept	kept	kept	kept
F19F10.1	54	5	5	kept	kept	kept	kept
F19F10.9	54	5	7	kept	kept	kept	kept
F20C5.4	43	7	4	kept	kept	kept	kept
F20D1.1	71	6	6	kept	removed	kept	kept
F20D1.9	71	7	1	removed	kept	kept	kept
F20D12.2	42	8	9	kept	kept	kept	kept
F20D6.11	54	7	11	kept	kept	kept	kept
F20D6.9	54	7	10	kept	kept	kept	kept
F21A3.2	60	8	6	kept	kept	kept	kept
F21D5.1	43	6	6	kept	kept	kept	kept
F21D5.4	43	6	8	kept	kept	kept	kept
F21D5.5	43	6	9	kept	kept	kept	kept
F21D5.6	43	6	10	kept	kept	kept	kept
F21D5.7	43	6	11	kept	kept	kept	removed
F21D5.8	43	7	1	kept	kept	kept	kept
F21G4.1	68	7	3	removed	kept	kept	kept
F21H11.4	30	2	7	kept	kept	removed	kept
F22B5.10	21	2	10	kept	kept	kept	kept
F22B8.7	61	2	5	kept	kept	kept	kept
F22D3.6	19	4	6	kept	kept	kept	kept
F22D6.2	5	8	6	removed	kept	kept	removed
F22E12.1	56	7	6	kept	kept	kept	kept
F22E5.12	16	2	2	kept	kept	removed	kept
F22E5.13	16	2	3	empty	kept	kept	kept
F22E5.6	16	1	11	kept	kept	kept	kept
F22E5.8	16	2	1	kept	kept	kept	kept
F22F7.2	51	4	11	kept	kept	kept	kept
F22F7.7	51	5	3	kept	kept	kept	kept
F22G12.4	11	8	4	removed	kept	removed	kept
F22G12.5	11	8	5	kept	kept	removed	removed
[truncated: 4,913 more rows]
