# Supplementary material for: Two conserved transcription factors and a histone deubiquitinase regulate the mitochondrial unfolded protein response and longevity interacting with insulin signalling.
Source: Research Square preprint supplement (doi:10.21203/rs.3.rs-3337719/v1), 2023-10-05
Supplement: Supplementary file 3 [file 3713b7f4d16f680dca27af3d.xlsx]

## Sheet: Increased UPRmt in phb-1(RNAi)
Columna1	GO.ID	Term	Annotated genes	Significant # genes	p value
1	GO:0008340	determination of adult lifespan	565	28	3.4e-07
2	GO:0007005	mitochondrion organization	57	7	6.6e-05
3	GO:0002119	nematode larval development	1477	45	0.00022
4	GO:0042775	mitochondrial ATP synthesis coupled elec...	21	4	0.00048
5	GO:0009792	embryo development ending in birth or eg...	1758	47	0.00077
6	GO:1990542	mitochondrial transmembrane transport	11	3	0.00086
7	GO:0051704	multi-organism process	499	18	0.00322
8	GO:0015986	ATP synthesis coupled proton transport	17	3	0.00328
9	GO:0043053	dauer entry	38	4	0.0047
10	GO:0031667	response to nutrient levels	46	4	0.00931
11	GO:1902578	single-organism localization	566	20	0.01389
12	GO:0044070	regulation of anion transport	11	2	0.01616
13	GO:0046467	membrane lipid biosynthetic process	31	3	0.01808
14	GO:0098542	defense response to other organism	56	4	0.01827
16	GO:0044743	protein transmembrane import into intrac...	12	2	0.01916
15	GO:0015914	phospholipid transport	12	2	0.01916
17	GO:0051707	response to other organism	57	4	0.01939
20	GO:0051050	positive regulation of transport	57	4	0.01939
19	GO:0043207	response to external biotic stimulus	57	4	0.01939
18	GO:0009607	response to biotic stimulus	57	4	0.01939
21	GO:1902600	hydrogen ion transmembrane transport	50	6	0.01973
22	GO:0044765	single-organism transport	545	19	0.02056
23	GO:0006897	endocytosis	649	19	0.02213
24	GO:0042594	response to starvation	34	3	0.02315
25	GO:0031669	cellular response to nutrient levels	14	2	0.0258
28	GO:0015748	organophosphate ester transport	14	2	0.0258
27	GO:0009267	cellular response to starvation	14	2	0.0258
26	GO:0008355	olfactory learning	14	2	0.0258
29	GO:0019953	sexual reproduction	439	14	0.02589
30	GO:0033036	macromolecule localization	708	20	0.02679
31	GO:0051241	negative regulation of multicellular org...	199	8	0.02733
32	GO:0033554	cellular response to stress	317	11	0.02757
33	GO:0044703	multi-organism reproductive process	445	14	0.0287
34	GO:0051093	negative regulation of developmental pro...	201	8	0.02879
35	GO:0071495	cellular response to endogenous stimulus	65	4	0.0298
37	GO:0022412	cellular process involved in reproductio...	281	10	0.03023
36	GO:0007281	germ cell development	281	10	0.03023
38	GO:0061064	negative regulation of nematode larval d...	167	7	0.03136
39	GO:0048581	negative regulation of post-embryonic de...	167	7	0.03136
40	GO:0007611	learning or memory	39	3	0.03315
43	GO:1905952	regulation of lipid localization	16	2	0.03324
45	GO:0071806	protein transmembrane transport	16	2	0.03324
44	GO:0071496	cellular response to external stimulus	16	2	0.03324
41	GO:0065002	intracellular protein transmembrane tran...	16	2	0.03324
42	GO:0031668	cellular response to extracellular stimu...	16	2	0.03324
46	GO:0006810	transport	1513	39	0.03336
47	GO:0044708	single-organism behavior	100	5	0.03462
48	GO:0071310	cellular response to organic substance	135	6	0.03535
50	GO:0099132	ATP hydrolysis coupled cation transmembr...	40	3	0.03538
49	GO:0099131	ATP hydrolysis coupled ion transmembrane...	40	3	0.03538
52	GO:0090662	ATP hydrolysis coupled transmembrane tra...	40	3	0.03538
51	GO:0010942	positive regulation of cell death	40	3	0.03538
53	GO:0032940	secretion by cell	136	6	0.03646
55	GO:0015992	proton transport	59	6	0.0371
54	GO:0006818	hydrogen transport	59	6	0.0371
56	GO:0007015	actin filament organization	41	3	0.03768
57	GO:0051445	regulation of meiotic cell cycle	104	5	0.03999
58	GO:0007635	chemosensory behavior	42	3	0.04006
59	GO:0016192	vesicle-mediated transport	786	21	0.04008
60	GO:0008306	associative learning	18	2	0.0414
61	GO:0034613	cellular protein localization	256	9	0.04172
62	GO:0050890	cognition	43	3	0.04251
63	GO:0006869	lipid transport	43	3	0.04251
64	GO:0040020	regulation of meiotic nuclear division	73	4	0.04298
65	GO:0070727	cellular macromolecule localization	258	9	0.0435
66	GO:0046903	secretion	143	6	0.04484
67	GO:0006898	receptor-mediated endocytosis	563	16	0.04496
68	GO:0007617	mating behavior	44	3	0.04504
69	GO:1905037	autophagosome organization	19	2	0.04574
70	GO:0000045	autophagosome assembly	19	2	0.04574
71	GO:0007167	enzyme linked receptor protein signaling...	75	4	0.04672
72	GO:0051603	proteolysis involved in cellular protein...	145	6	0.04744
73	GO:0010171	body morphogenesis	433	13	0.04785
74	GO:0009719	response to endogenous stimulus	76	4	0.04865

## Sheet: Increased UPRmt in phb-1;daf-2
Columna1	GO.ID	Term	Annotated genes	Significant # genes	p value
1	GO:0042775	mitochondrial ATP synthesis coupled elec...	21	7	3.1e-05
2	GO:0007413	axonal fasciculation	52	9	0.00061
3	GO:0015696	ammonium transport	19	5	0.00149
4	GO:0042787	protein ubiquitination involved in ubiqu...	39	7	0.00197
5	GO:0043171	peptide catabolic process	21	5	0.00242
6	GO:0032222	regulation of synaptic transmission, cho...	14	4	0.00329
7	GO:0009792	embryo development ending in birth or eg...	1758	102	0.00464
8	GO:0007005	mitochondrion organization	57	8	0.00478
9	GO:0006839	mitochondrial transport	17	4	0.007
10	GO:0006515	misfolded or incompletely synthesized pr...	10	3	0.00965
11	GO:0071218	cellular response to misfolded protein	10	3	0.00965
12	GO:0006890	retrograde vesicle-mediated transport, G...	11	3	0.01282
13	GO:1990542	mitochondrial transmembrane transport	11	3	0.01282
14	GO:0006486	protein glycosylation	55	7	0.01377
15	GO:0043413	macromolecule glycosylation	55	7	0.01377
16	GO:0016485	protein processing	32	5	0.01572
17	GO:0070085	glycosylation	57	7	0.01658
18	GO:0071407	cellular response to organic cyclic comp...	33	5	0.01784
19	GO:1901699	cellular response to nitrogen compound	34	5	0.02014
20	GO:0009101	glycoprotein biosynthetic process	73	8	0.02043
21	GO:1901374	acetate ester transport	13	3	0.02073
22	GO:0032224	positive regulation of synaptic transmis...	13	3	0.02073
23	GO:0015870	acetylcholine transport	13	3	0.02073
24	GO:0032543	mitochondrial translation	23	4	0.0209
25	GO:0051604	protein maturation	35	5	0.02262
26	GO:0007610	behavior	443	30	0.02509
27	GO:0016358	dendrite development	36	5	0.02529
28	GO:0042493	response to drug	14	3	0.02548
29	GO:0051231	spindle elongation	14	3	0.02548
30	GO:0043050	pharyngeal pumping	52	6	0.03392
31	GO:0010639	negative regulation of organelle organiz...	39	5	0.0345
32	GO:0045132	meiotic chromosome segregation	97	9	0.03779
33	GO:0009100	glycoprotein metabolic process	83	8	0.04027
34	GO:1901657	glycosyl compound metabolic process	41	5	0.04165
35	GO:0009887	animal organ morphogenesis	84	8	0.04278
36	GO:0015985	energy coupled proton transport, down el...	17	3	0.04293
37	GO:0015986	ATP synthesis coupled proton transport	17	3	0.04293
38	GO:0050806	positive regulation of synaptic transmis...	17	3	0.04293
39	GO:0010212	response to ionizing radiation	17	3	0.04293
40	GO:0098813	nuclear chromosome segregation	132	11	0.04542
41	GO:0014070	response to organic cyclic compound	42	5	0.04554
42	GO:0042755	eating behavior	56	6	0.04639
43	GO:1901137	carbohydrate derivative biosynthetic pro...	183	14	0.04828
44	GO:0071417	cellular response to organonitrogen comp...	18	3	0.04978

## Sheet: Decreased UPRmt in phb-1(RNAi)
Columna1	GO.ID	Term	Annotated genes	Significant # genes	p value
1	GO:0006412	translation	229	90	1.4e-26
2	GO:0006898	receptor-mediated endocytosis	563	89	1.1e-15
3	GO:0040011	locomotion	1180	155	4.8e-14
4	GO:0040035	hermaphrodite genitalia development	512	77	2.4e-12
5	GO:0008406	gonad development	673	112	3.2e-12
6	GO:0015991	ATP hydrolysis coupled proton transport	19	13	9.7e-12
7	GO:0006418	tRNA aminoacylation for protein translat...	28	15	3.7e-11
8	GO:0010171	body morphogenesis	433	65	2.1e-10
9	GO:0007281	germ cell development	281	49	1.9e-08
10	GO:0040018	positive regulation of multicellular org...	224	37	2.3e-07
11	GO:0002181	cytoplasmic translation	17	9	4.1e-07
12	GO:0040039	inductive cell migration	109	23	6.7e-07
13	GO:0000398	mRNA splicing, via spliceosome	94	21	7.7e-07
14	GO:0008340	determination of adult lifespan	565	68	8.1e-07
15	GO:0000028	ribosomal small subunit assembly	14	8	8.7e-07
16	GO:0006413	translational initiation	31	11	3e-06
17	GO:0000027	ribosomal large subunit assembly	15	7	2.5e-05
18	GO:0006458	'de novo' protein folding	11	6	3.2e-05
19	GO:0032940	secretion by cell	136	23	3.4e-05
20	GO:0051452	intracellular pH reduction	12	6	6.1e-05
21	GO:0000470	maturation of LSU-rRNA	19	7	0.00015
22	GO:0043652	engulfment of apoptotic cell	70	14	0.0002
23	GO:0006414	translational elongation	20	7	0.00022
24	GO:0016477	cell migration	254	44	0.00035
25	GO:0000910	cytokinesis	50	11	0.0004
26	GO:0045727	positive regulation of translation	11	5	0.00046
27	GO:0042254	ribosome biogenesis	150	42	0.0006
28	GO:0048477	oogenesis	156	22	0.00074
29	GO:0030490	maturation of SSU-rRNA	36	11	0.00111
30	GO:0010608	posttranscriptional regulation of gene e...	167	26	0.00151
31	GO:0071426	ribonucleoprotein complex export from nu...	21	6	0.00212
32	GO:0000462	maturation of SSU-rRNA from tricistronic...	28	7	0.00212
33	GO:0061077	chaperone-mediated protein folding	15	5	0.00238
34	GO:0040007	growth	419	60	0.0025
35	GO:0000122	negative regulation of transcription fro...	63	11	0.00301
36	GO:0030866	cortical actin cytoskeleton organization	10	4	0.00315
37	GO:0022613	ribonucleoprotein complex biogenesis	193	50	0.00397
38	GO:0006405	RNA export from nucleus	27	9	0.00511
39	GO:0051028	mRNA transport	18	5	0.00573
40	GO:0007276	gamete generation	353	63	0.00591
41	GO:0030728	ovulation	26	6	0.00673
42	GO:0071826	ribonucleoprotein complex subunit organi...	84	24	0.00842
43	GO:0034622	cellular macromolecular complex assembly	299	43	0.00889
44	GO:0035188	hatching	36	7	0.00938
45	GO:0040022	feminization of hermaphroditic germ-line	29	6	0.0117
46	GO:0031033	myosin filament organization	96	13	0.01219
47	GO:0042335	cuticle development	86	12	0.01254
48	GO:0022618	ribonucleoprotein complex assembly	78	23	0.01289
49	GO:1990778	protein localization to cell periphery	30	6	0.01381
50	GO:0035194	posttranscriptional gene silencing by RN...	110	14	0.01593
51	GO:0016441	posttranscriptional gene silencing	110	14	0.01593
52	GO:0034504	protein localization to nucleus	40	7	0.01659
53	GO:0090501	RNA phosphodiester bond hydrolysis	50	8	0.01808
54	GO:0031047	gene silencing by RNA	112	14	0.01843
55	GO:0043067	regulation of programmed cell death	70	10	0.01867
56	GO:0016071	mRNA metabolic process	178	32	0.01883
57	GO:0006997	nucleus organization	41	7	0.01888
58	GO:0061640	cytoskeleton-dependent cytokinesis	24	5	0.02033
59	GO:0040002	collagen and cuticulin-based cuticle dev...	82	11	0.02165
60	GO:0007052	mitotic spindle organization	43	7	0.02411
61	GO:1902850	microtubule cytoskeleton organization in...	43	7	0.02411
62	GO:0000478	endonucleolytic cleavage involved in rRN...	10	3	0.02598
63	GO:0006379	mRNA cleavage	10	3	0.02598
64	GO:0031034	myosin filament assembly	95	12	0.02599
65	GO:0071688	striated muscle myosin thick filament as...	95	12	0.02599
66	GO:0007163	establishment or maintenance of cell pol...	64	9	0.02745
67	GO:0015833	peptide transport	260	30	0.02823
68	GO:0035264	multicellular organism growth	252	42	0.02892
69	GO:0030010	establishment of cell polarity	45	7	0.03026
70	GO:0042273	ribosomal large subunit biogenesis	44	17	0.03094
71	GO:0031032	actomyosin structure organization	109	13	0.032
72	GO:0042886	amide transport	263	30	0.03215
73	GO:0006606	protein import into nucleus	36	6	0.03221
74	GO:1902593	single-organism nuclear import	36	6	0.03221
75	GO:0040021	hermaphrodite germ-line sex determinatio...	36	6	0.03221
76	GO:0044744	protein targeting to nucleus	36	6	0.03221
77	GO:0006888	ER to Golgi vesicle-mediated transport	27	5	0.03271
78	GO:0051146	striated muscle cell differentiation	110	13	0.03416
79	GO:0055001	muscle cell development	110	13	0.03416
80	GO:0006417	regulation of translation	68	13	0.03462
81	GO:0034248	regulation of cellular amide metabolic p...	68	13	0.03462
82	GO:0051254	positive regulation of RNA metabolic pro...	145	16	0.0355
83	GO:0042692	muscle cell differentiation	122	14	0.03563
84	GO:0006754	ATP biosynthetic process	19	4	0.03583
85	GO:0051170	nuclear import	37	6	0.03634
86	GO:0090502	RNA phosphodiester bond hydrolysis, endo...	28	5	0.03769
87	GO:0007275	multicellular organism development	2634	303	0.03841
88	GO:0016246	RNA interference	101	12	0.03947
89	GO:0044265	cellular macromolecule catabolic process	208	21	0.04171
90	GO:0000460	maturation of 5.8S rRNA	20	4	0.04247
91	GO:0071822	protein complex subunit organization	258	25	0.04281
92	GO:0000466	maturation of 5.8S rRNA from tricistroni...	12	3	0.04307
93	GO:0033206	meiotic cytokinesis	12	3	0.04307
94	GO:0000387	spliceosomal snRNP assembly	12	3	0.04307
95	GO:0016458	gene silencing	127	14	0.04763
96	GO:0007051	spindle organization	60	8	0.04807
97	GO:1902582	single-organism intracellular transport	116	13	0.04931
98	GO:0009145	purine nucleoside triphosphate biosynthe...	21	4	0.04976
99	GO:0009206	purine ribonucleoside triphosphate biosy...	21	4	0.04976
100	GO:0010629	negative regulation of gene expression	267	31	0.0499

## Sheet: Decreased UPRmt in phb-1;daf-2
Columna1	GO.ID	Term	Annotated genes	Significant # genes	p value
1	GO:0018996	molting cycle, collagen and cuticulin-ba...	195	67	4.9e-28
2	GO:0040035	hermaphrodite genitalia development	512	113	5.9e-28
3	GO:0000003	reproduction	1800	285	3.3e-22
4	GO:0040011	locomotion	1180	188	1.4e-21
5	GO:0006915	apoptotic process	362	74	6.4e-16
6	GO:0010171	body morphogenesis	433	78	1.5e-13
7	GO:0008406	gonad development	673	150	4.9e-13
8	GO:0007281	germ cell development	281	54	3.1e-10
9	GO:0015991	ATP hydrolysis coupled proton transport	19	12	1.2e-09
10	GO:0040039	inductive cell migration	109	28	7.3e-09
11	GO:0006418	tRNA aminoacylation for protein translat...	28	12	3.9e-07
12	GO:0006412	translation	229	55	5.9e-07
13	GO:0040018	positive regulation of multicellular org...	224	39	8.7e-07
14	GO:0016246	RNA interference	101	23	1.7e-06
15	GO:0043652	engulfment of apoptotic cell	70	17	1.6e-05
16	GO:0000470	maturation of LSU-rRNA	19	8	4.3e-05
17	GO:0022618	ribonucleoprotein complex assembly	78	22	5.4e-05
18	GO:0000027	ribosomal large subunit assembly	15	7	6e-05
19	GO:0061077	chaperone-mediated protein folding	15	7	6e-05
20	GO:0045727	positive regulation of translation	11	6	6.9e-05
21	GO:0006458	'de novo' protein folding	11	6	6.9e-05
22	GO:0007276	gamete generation	353	73	8.7e-05
23	GO:0030728	ovulation	26	9	8.8e-05
24	GO:0006998	nuclear envelope organization	16	7	9.9e-05
25	GO:0051452	intracellular pH reduction	12	6	0.00013
26	GO:0008340	determination of adult lifespan	565	67	0.00016
27	GO:0000398	mRNA splicing, via spliceosome	94	18	0.00025
28	GO:0006379	mRNA cleavage	10	5	0.0005
29	GO:0051301	cell division	183	32	0.00059
30	GO:0000462	maturation of SSU-rRNA from tricistronic...	28	8	0.00095
31	GO:0051302	regulation of cell division	28	8	0.00095
32	GO:0007067	mitotic nuclear division	134	21	0.00134
33	GO:0030104	water homeostasis	12	5	0.00137
34	GO:0030490	maturation of SSU-rRNA	36	12	0.00183
35	GO:0050793	regulation of developmental process	547	77	0.00185
36	GO:0016477	cell migration	254	49	0.00189
37	GO:0006397	mRNA processing	133	27	0.00197
38	GO:0006270	DNA replication initiation	13	5	0.00209
39	GO:0042254	ribosome biogenesis	150	46	0.00228
40	GO:0006357	regulation of transcription from RNA pol...	258	33	0.00257
41	GO:0035194	posttranscriptional gene silencing by RN...	110	27	0.00282
42	GO:0044786	cell cycle DNA replication	14	5	0.00304
43	GO:0048477	oogenesis	156	22	0.00409
44	GO:0071426	ribonucleoprotein complex export from nu...	21	6	0.00416
45	GO:0031167	rRNA methylation	10	4	0.00513
46	GO:0006352	DNA-templated transcription, initiation	29	7	0.00558
47	GO:0000132	establishment of mitotic spindle orienta...	29	7	0.00558
48	GO:0040022	feminization of hermaphroditic germ-line	29	7	0.00558
49	GO:0043628	ncRNA 3'-end processing	16	5	0.00583
50	GO:0007098	centrosome cycle	16	5	0.00583
51	GO:0033365	protein localization to organelle	123	18	0.00614
52	GO:0034622	cellular macromolecular complex assembly	299	49	0.00643
53	GO:0042127	regulation of cell proliferation	96	15	0.00652
54	GO:0045893	positive regulation of transcription, DN...	143	20	0.00666
55	GO:0042273	ribosomal large subunit biogenesis	44	18	0.0068
56	GO:0051445	regulation of meiotic cell cycle	104	19	0.0075
57	GO:0016073	snRNA metabolic process	11	4	0.00758
58	GO:0006364	rRNA processing	102	30	0.00787
59	GO:0006413	translational initiation	31	7	0.00822
60	GO:0040020	regulation of meiotic nuclear division	73	12	0.00962
61	GO:0040002	collagen and cuticulin-based cuticle dev...	82	13	0.00973
62	GO:0000278	mitotic cell cycle	232	37	0.01007
63	GO:0007097	nuclear migration	48	9	0.01026
64	GO:0040023	establishment of nucleus localization	48	9	0.01026
65	GO:0010942	positive regulation of cell death	40	8	0.01033
66	GO:0034504	protein localization to nucleus	40	8	0.01033
67	GO:0010564	regulation of cell cycle process	139	23	0.01035
68	GO:0016071	mRNA metabolic process	178	36	0.01052
69	GO:0035195	gene silencing by miRNA	12	4	0.01068
70	GO:0000387	spliceosomal snRNP assembly	12	4	0.01068
71	GO:0006401	RNA catabolic process	49	9	0.01174
72	GO:0051647	nucleus localization	50	9	0.01337
73	GO:0046903	secretion	143	19	0.01373
74	GO:0006402	mRNA catabolic process	42	8	0.01384
75	GO:0040007	growth	419	62	0.014
76	GO:0071822	protein complex subunit organization	258	30	0.01514
77	GO:0007051	spindle organization	60	10	0.01586
78	GO:0000460	maturation of 5.8S rRNA	20	5	0.016
79	GO:0006414	translational elongation	20	5	0.016
80	GO:0032940	secretion by cell	136	18	0.01683
81	GO:0045787	positive regulation of cell cycle	61	10	0.0177
82	GO:2000113	negative regulation of cellular macromol...	127	17	0.01792
83	GO:0048646	anatomical structure formation involved ...	147	19	0.01804
84	GO:0040025	vulval development	251	29	0.01819
85	GO:0090502	RNA phosphodiester bond hydrolysis, endo...	28	6	0.01823
86	GO:0035188	hatching	36	7	0.01867
87	GO:0071684	organism emergence from protective struc...	36	7	0.01867
88	GO:0044770	cell cycle phase transition	36	7	0.01867
89	GO:0000154	rRNA modification	18	7	0.01888
90	GO:0031124	mRNA 3'-end processing	14	4	0.01908
91	GO:0040014	regulation of multicellular organism gro...	239	43	0.01997
92	GO:0010558	negative regulation of macromolecule bio...	129	17	0.02064
93	GO:0006366	transcription from RNA polymerase II pro...	280	38	0.02074
94	GO:0048569	post-embryonic animal organ development	254	29	0.02108
95	GO:0000956	nuclear-transcribed mRNA catabolic proce...	37	7	0.02155
96	GO:0007338	single fertilization	54	9	0.02159
97	GO:0045184	establishment of protein localization	258	33	0.02292
98	GO:0009791	post-embryonic development	1497	278	0.02322
99	GO:0035046	pronuclear migration	46	8	0.02335
100	GO:0010501	RNA secondary structure unwinding	22	5	0.02392
101	GO:0070897	DNA-templated transcriptional preinitiat...	15	4	0.02447
102	GO:0045944	positive regulation of transcription fro...	132	17	0.0253
103	GO:0043623	cellular protein complex assembly	184	22	0.02625
104	GO:0006260	DNA replication	74	18	0.0264
105	GO:0015031	protein transport	251	32	0.02762
106	GO:0040028	regulation of vulval development	196	23	0.02842
107	GO:0048522	positive regulation of cellular process	423	54	0.02848
108	GO:0009201	ribonucleoside triphosphate biosynthetic...	23	5	0.02868
109	GO:0043068	positive regulation of programmed cell d...	31	6	0.02928
110	GO:0022411	cellular component disassembly	66	10	0.02937
111	GO:0031123	RNA 3'-end processing	32	9	0.02971
112	GO:0090501	RNA phosphodiester bond hydrolysis	50	12	0.03032
113	GO:0031034	myosin filament assembly	95	13	0.03056
114	GO:0071688	striated muscle myosin thick filament as...	95	13	0.03056
115	GO:0010941	regulation of cell death	86	12	0.03228
116	GO:0031327	negative regulation of cellular biosynth...	136	17	0.0327
117	GO:0009890	negative regulation of biosynthetic proc...	136	17	0.0327
118	GO:0031033	myosin filament organization	96	13	0.03296
119	GO:0008105	asymmetric protein localization	32	6	0.03377
120	GO:0045935	positive regulation of nucleobase-contai...	153	23	0.0346
121	GO:0040027	negative regulation of vulval developmen...	158	19	0.03538
122	GO:0000910	cytokinesis	50	8	0.03672
123	GO:0006275	regulation of DNA replication	10	3	0.03684
124	GO:0000478	endonucleolytic cleavage involved in rRN...	10	3	0.03684
125	GO:0006360	transcription from RNA polymerase I prom...	10	3	0.03684
126	GO:0010940	positive regulation of necrotic cell dea...	10	3	0.03684
127	GO:0031125	rRNA 3'-end processing	10	3	0.03684
128	GO:0065001	specification of axis polarity	10	3	0.03684
129	GO:0040032	post-embryonic body morphogenesis	10	3	0.03684
130	GO:0007049	cell cycle	456	64	0.0375
131	GO:0000469	cleavage involved in rRNA processing	17	4	0.03774
132	GO:0007040	lysosome organization	17	4	0.03774
133	GO:0002181	cytoplasmic translation	17	4	0.03774
134	GO:0000245	spliceosomal complex assembly	17	4	0.03774
135	GO:0080171	lytic vacuole organization	17	4	0.03774
136	GO:0070482	response to oxygen levels	17	4	0.03774
137	GO:0010629	negative regulation of gene expression	267	45	0.03912
138	GO:0009142	nucleoside triphosphate biosynthetic pro...	25	5	0.03989
139	GO:0009566	fertilization	60	9	0.03993
140	GO:0007346	regulation of mitotic cell cycle	89	12	0.0407
141	GO:0015833	peptide transport	260	32	0.04178
142	GO:0043067	regulation of programmed cell death	70	10	0.042
143	GO:0045892	negative regulation of transcription, DN...	90	12	0.04382
144	GO:0007052	mitotic spindle organization	43	7	0.04533
145	GO:1902850	microtubule cytoskeleton organization in...	43	7	0.04533
146	GO:0051028	mRNA transport	18	4	0.04565
147	GO:0006367	transcription initiation from RNA polyme...	18	4	0.04565
148	GO:0010453	regulation of cell fate commitment	18	4	0.04565
149	GO:0032508	DNA duplex unwinding	26	5	0.04637
150	GO:0051172	negative regulation of nitrogen compound...	142	17	0.04664
151	GO:0042886	amide transport	263	32	0.04752
152	GO:1903047	mitotic cell cycle process	201	32	0.04775
153	GO:0007506	gonadal mesoderm development	11	3	0.04782
154	GO:0030201	heparan sulfate proteoglycan metabolic p...	11	3	0.04782
155	GO:0010939	regulation of necrotic cell death	11	3	0.04782
156	GO:0006378	mRNA polyadenylation	11	3	0.04782
157	GO:0015012	heparan sulfate proteoglycan biosyntheti...	11	3	0.04782
158	GO:0045930	negative regulation of mitotic cell cycl...	53	8	0.04959
